# Supplementary material for: Quantum tunnelling effect in the cis–trans isomerization of uranyl tetrahydroxide
Source: Royal Society of Chemistry journal article supplement (doi:10.1039/d4dt02071e), 2024-01-01
Supplement: d4dt02071e1.pdf [file d4dt02071e1.pdf]

## Supplementary information

# Quantum Tunnelling Effect in the Cis-Trans Isomerization of Uranyl Tetra Hydroxide

Yeshayahu Ben-Eliyahu,<sup>a</sup> Sebastian Kozuch<sup>b</sup>

<sup>a</sup> Chemistry Department, Nuclear Research Centre-Negev, Beer-Sheva, 84190, Israel. E-mail: ybe614@gmail.com

<sup>b</sup> Department of Chemistry, Ben-Gurion University of the Negev, Beer-Sheva 841051, Israel. E-mail: kozuch@bgu.ac.il

### Table of contents

|                                                                                                 |    |
|-------------------------------------------------------------------------------------------------|----|
| 1. <i>Uranyl Tetra Hydroxide (UTH) conformers</i> .....                                         | 2  |
| 2. <i>Activation barriers and reaction energies of the isomerization reaction</i> .....         | 5  |
| 3. <i>Thermodynamic data</i> .....                                                              | 6  |
| 4. <i>Thermodynamic data of the most stable conformers of the three reaction pathways</i> ..... | 10 |
| 5. <i>Conformers' geometries</i> .....                                                          | 13 |
| 6. <i>Polyrate 17 input file example</i> .....                                                  | 33 |
| 7. <i>Reaction rate constants</i> .....                                                         | 36 |
| 8. <i>Reaction rate constants of deuterated complexes</i> .....                                 | 42 |

## Uranyl Tetra Hydroxide (UTH) conformers:

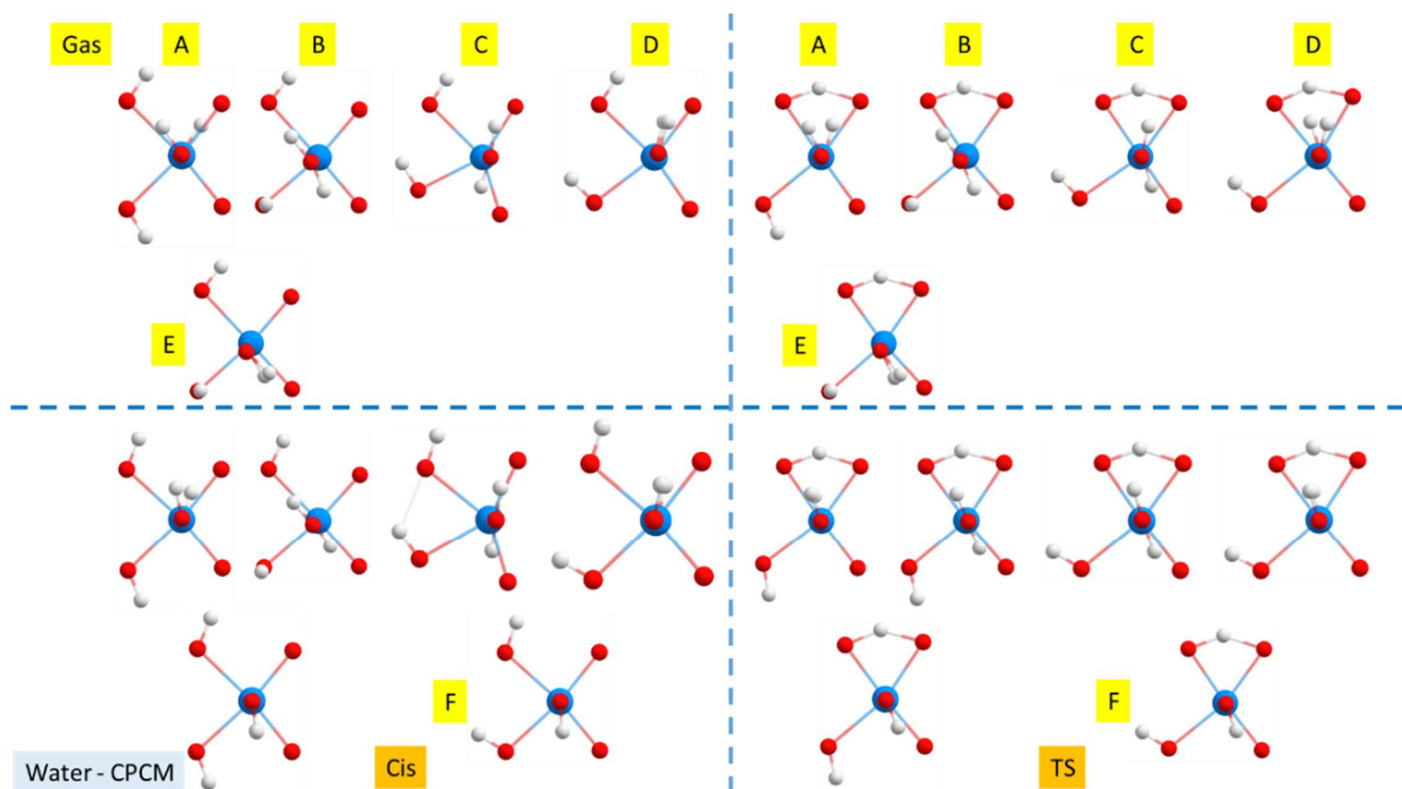

Figure S1: Cis and transition states conformations of the studied UTH:  $[\text{UO}_2(\text{OH})_4]^{2-}$  complexes, in gas phase (upper icons) and in water solution (lower icons).

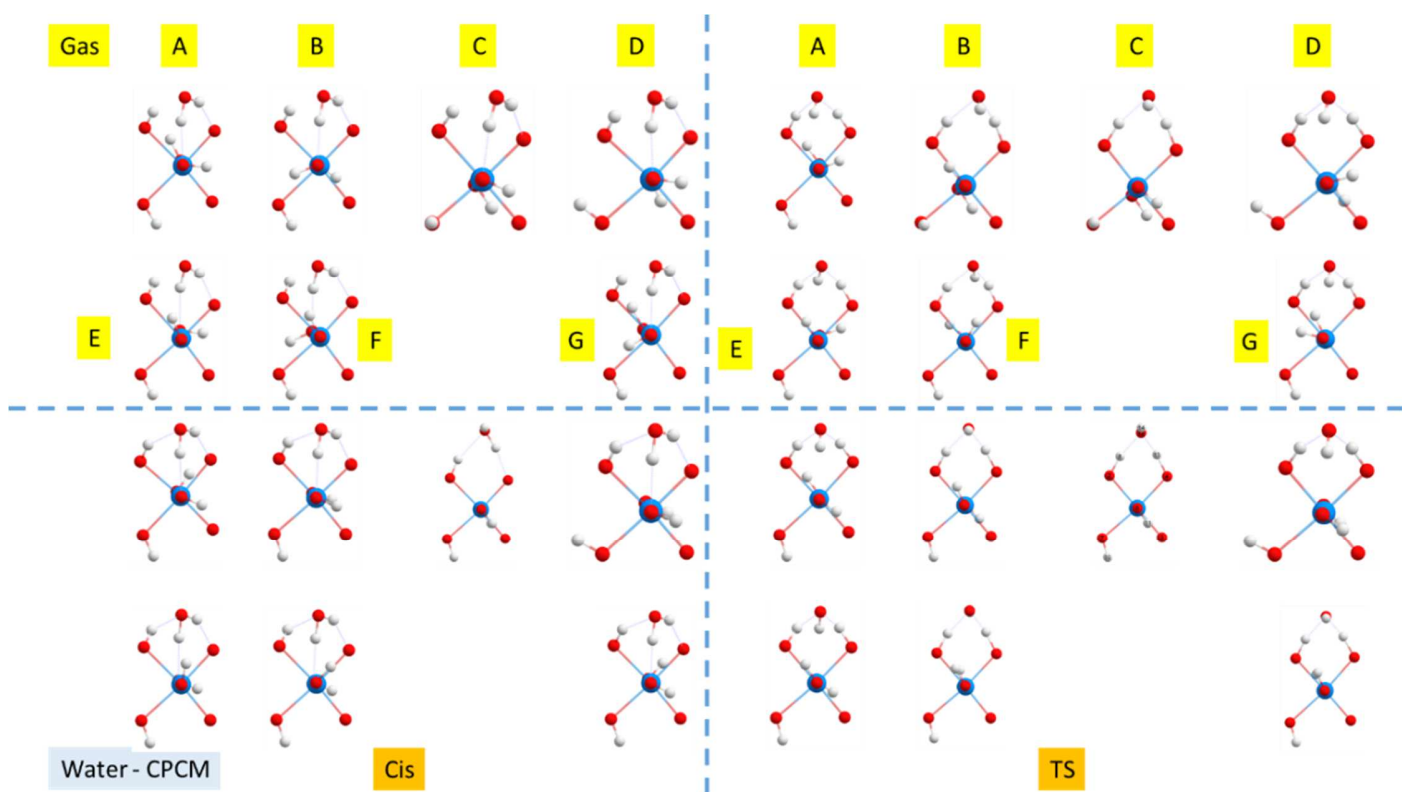

Figure S2: Cis and transition state conformations of the studied  $\text{UTH}\cdots\text{H}_2\text{O}$ :  $[\text{UO}_2(\text{OH})_4]^{2-}\cdots\text{H}_2\text{O}$  complexes in gas phase (upper icons) and in water solution (lower icons)

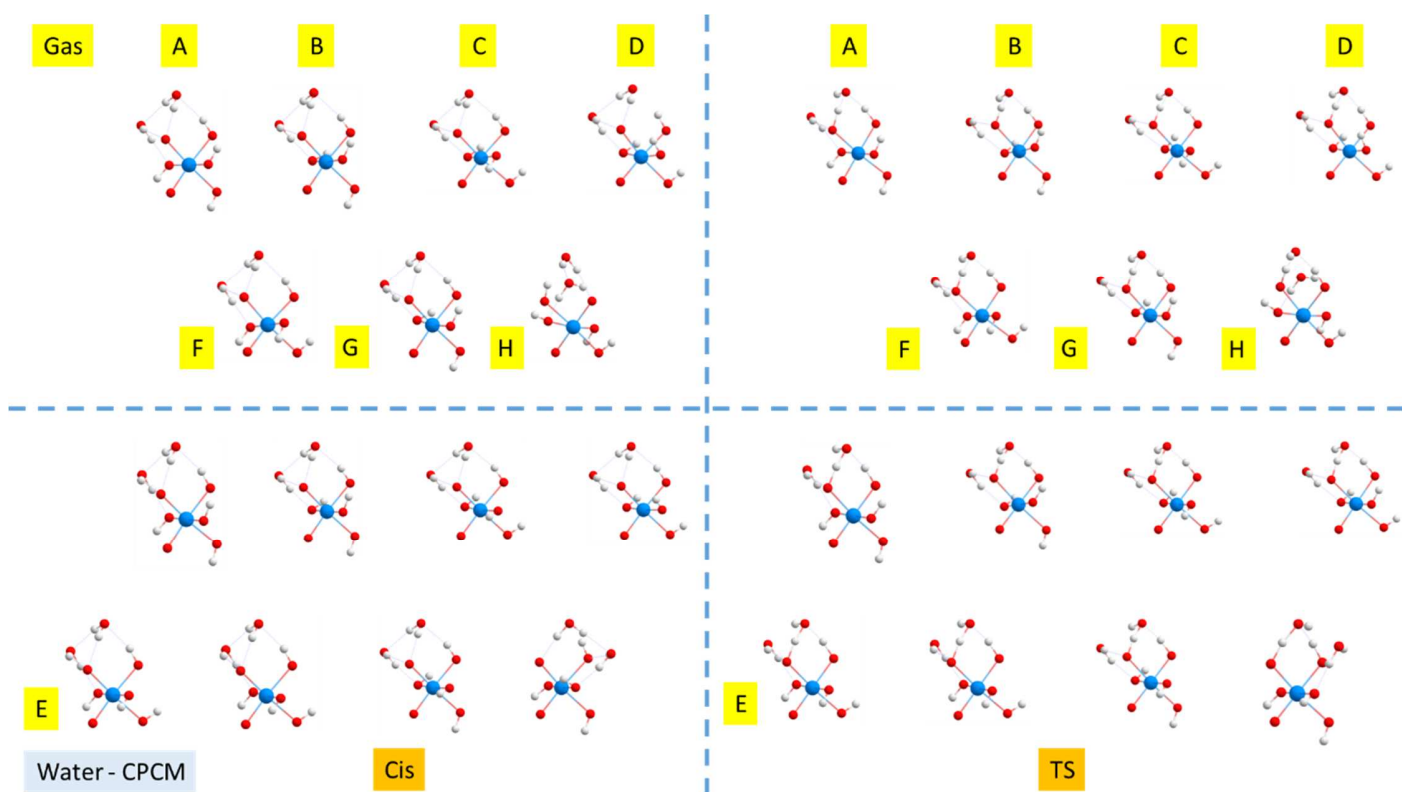

Figure S3: Cis and transition state conformations of the studied  $\text{UTH}\cdots(\text{H}_2\text{O})_2$ :  $[\text{UO}_2(\text{OH})_4]^{2-}\cdots(\text{H}_2\text{O})_2$  complexes in gas phase (upper icons) and in water solution (lower icons)

**Activation barrier and reaction energy of isomerization reaction of UTH conformers:**

| UTH       | Gas                                         |                |                                      |                | Water - CPCM                                |                |                                      |                |
|-----------|---------------------------------------------|----------------|--------------------------------------|----------------|---------------------------------------------|----------------|--------------------------------------|----------------|
|           | $\Delta E^\ddagger$ (kJ·mol <sup>-1</sup> ) |                | $\Delta E_r$ (kJ·mol <sup>-1</sup> ) |                | $\Delta E^\ddagger$ (kJ·mol <sup>-1</sup> ) |                | $\Delta E_r$ (kJ·mol <sup>-1</sup> ) |                |
| Conformer | DFT                                         | DLPNO-CCSD(T1) | DFT                                  | DLPNO-CCSD(T1) | DFT                                         | DLPNO-CCSD(T1) | DFT                                  | DLPNO-CCSD(T1) |
| A         | 64                                          | 79             | -102                                 | -92            | 74                                          | 88             | -101                                 | -92            |
| B         | 66                                          | 75             | -101                                 | -96            | 68                                          | 79             | -107                                 | -102           |
| C         | 69                                          | 73             | -100                                 | -100           | 75                                          | 64             | -104                                 | -121           |
| D         | 64                                          | 79             | -101                                 | -87            | 76                                          | 90             | -104                                 | -95            |
| E         | 68                                          | 77             | -98                                  | -92            | 74                                          | 89             | -101                                 | -93            |
| F         |                                             |                |                                      |                | 75                                          | 89             | -104                                 | -95            |

| UTH...H <sub>2</sub> O | Gas                                         |                |                                      |                | Water - CPCM                                |                |                                      |                |
|------------------------|---------------------------------------------|----------------|--------------------------------------|----------------|---------------------------------------------|----------------|--------------------------------------|----------------|
|                        | $\Delta E^\ddagger$ (kJ·mol <sup>-1</sup> ) |                | $\Delta E_r$ (kJ·mol <sup>-1</sup> ) |                | $\Delta E^\ddagger$ (kJ·mol <sup>-1</sup> ) |                | $\Delta E_r$ (kJ·mol <sup>-1</sup> ) |                |
| Conformer              | DFT                                         | DLPNO-CCSD(T1) | DFT                                  | DLPNO-CCSD(T1) | DFT                                         | DLPNO-CCSD(T1) | DFT                                  | DLPNO-CCSD(T1) |
| A                      | 51                                          | 51             | -90                                  | -88            | 51                                          | 54             | -88                                  | -86            |
| B                      | 58                                          | 56             | -86                                  | -83            | 50                                          | 38             | -81                                  | -81            |
| C                      | 51                                          | 44             | -89                                  | -98            | 26                                          | 34             | -111                                 | -88            |
| D                      | 54                                          | 54             | -91                                  | -89            | 50                                          | 52             | -90                                  | -90            |
| E                      | 51                                          | 51             | -90                                  | -88            | 51                                          | 54             | -88                                  | -86            |
| F                      | 57                                          | 55             | -82                                  | -80            | 51                                          | 38             | -82                                  | -82            |
| G                      | 57                                          | 59             | -84                                  | -81            | 51                                          | 40             | -82                                  | -80            |

| UTH...(H <sub>2</sub> O) <sub>2</sub> | Gas                                         |                |                                      |                | Water - CPCM                                |                |                                      |                |
|---------------------------------------|---------------------------------------------|----------------|--------------------------------------|----------------|---------------------------------------------|----------------|--------------------------------------|----------------|
|                                       | $\Delta E^\ddagger$ (kJ·mol <sup>-1</sup> ) |                | $\Delta E_r$ (kJ·mol <sup>-1</sup> ) |                | $\Delta E^\ddagger$ (kJ·mol <sup>-1</sup> ) |                | $\Delta E_r$ (kJ·mol <sup>-1</sup> ) |                |
| Conformer                             | DFT                                         | DLPNO-CCSD(T1) | DFT                                  | DLPNO-CCSD(T1) | DFT                                         | DLPNO-CCSD(T1) | DFT                                  | DLPNO-CCSD(T1) |
| A                                     | 36                                          | 40             | -108                                 | -102           | 36                                          | 41             | -100                                 | -94            |
| B                                     | 37                                          | 40             | -111                                 | -104           | 37                                          | 40             | -105                                 | -98            |
| C                                     | 38                                          | 40             | -115                                 | -108           | 37                                          | 39             | -107                                 | -102           |
| D                                     | 39                                          | 42             | -110                                 | -103           | 38                                          | 41             | -107                                 | -101           |
| E                                     | 36                                          | 40             | -108                                 | -102           | 36                                          | 40             | -103                                 | -97            |
| F                                     | 39                                          | 42             | -109                                 | -103           | 36                                          | 40             | -103                                 | -97            |
| G                                     | 37                                          | 40             | -111                                 | -104           | 37                                          | 39             | -104                                 | -99            |
| H                                     | 55                                          | 57             | -73                                  | -68            | 48                                          | 49             | -74                                  | -77            |

**Thermodynamic data:**

|       | Gas                                   |                             |              | CPCM - Water                       |                             |              |
|-------|---------------------------------------|-----------------------------|--------------|------------------------------------|-----------------------------|--------------|
|       | UTH                                   |                             |              |                                    |                             |              |
|       | Electronic Energy (DLPNO-CCSD(T1))    | Thermal Correction Enthalpy | Entropy      | Electronic Energy (DLPNO-CCSD(T1)) | Thermal Correction Enthalpy | Entropy      |
| Conf. | Ha                                    | Ha                          | J/mol-kelvin | Ha                                 | Ha                          | J/mol-kelvin |
| A     | -929.87519                            | 0.06781                     | 438.56311    | -930.200359                        | 0.06681                     | 450.26159    |
| B     | -929.87357                            | 0.06818                     | 436.53934    | -930.196728                        | 0.06676                     | 448.55207    |
| C     | -929.87211                            | 0.06876                     | 436.99605    | -930.18966                         | 0.06844                     | 428.56996    |
| D     | -929.87469                            | 0.06780                     | 451.40127    | -930.199288                        | 0.06689                     | 452.01301    |
| E     | -929.87366                            | 0.06808                     | 436.27956    | -930.200327                        | 0.06691                     | 451.49764    |
| F     |                                       |                             |              | -930.199301                        | 0.06593                     | 452.30212    |
|       | UTH...H <sub>2</sub> O                |                             |              |                                    |                             |              |
| A     | -1006.27558                           | 0.09697                     | 472.15434    | -1006.58315                        | 0.09565                     | 479.91841    |
| B     | -1006.27636                           | 0.09698                     | 472.09149    | -1006.58261                        | 0.09571                     | 473.66693    |
| C     | -1006.27249                           | 0.09671                     | 482.21872    | -1006.58232                        | 0.09484                     | 504.87405    |
| D     | -1006.27579                           | 0.09697                     | 476.20188    | -1006.58169                        | 0.09571                     | 478.26755    |
| E     | -1006.27558                           | 0.09697                     | 472.1711     | -1006.58313                        | 0.09567                     | 477.02312    |
| F     | -1006.27734                           | 0.09711                     | 469.24229    | -1006.58249                        | 0.09567                     | 476.97703    |
| G     | -1006.27735                           | 0.09710                     | 469.38056    | -1006.58314                        | 0.09567                     | 477.01893    |
|       | UTH...(H <sub>2</sub> O) <sub>2</sub> |                             |              |                                    |                             |              |
| A     | -1082.67057                           | 0.12545                     | 516.71499    | -1082.96505                        | 0.12402                     | 519.81140    |
| B     | -1082.67040                           | 0.12542                     | 519.72341    | -1082.96319                        | 0.12396                     | 522.69412    |
| C     | -1082.66879                           | 0.12540                     | 521.06840    | -1082.96170                        | 0.12401                     | 523.70391    |
| D     | -1082.66984                           | 0.12556                     | 513.80713    | -1082.96196                        | 0.12405                     | 525.49304    |
| E     |                                       |                             |              | -1082.96380                        | 0.12390                     | 525.08661    |
| F     | -1082.67077                           | 0.12544                     | 519.87844    | -1082.96376                        | 0.12391                     | 525.00700    |
| G     | -1082.67041                           | 0.12542                     | 519.60609    | -1082.96298                        | 0.12396                     | 521.87288    |
| H     | -1082.67452                           | 0.12574                     | 517.78763    | -1082.96687                        | 0.12428                     | 518.55859    |

| $\Delta G(T)$ (J/mole)                      |         |         |         |         |         |              |         |         |         |         |
|---------------------------------------------|---------|---------|---------|---------|---------|--------------|---------|---------|---------|---------|
| Gas                                         |         |         |         |         |         | CPCM - Water |         |         |         |         |
| Cis - UTH                                   |         |         |         |         |         |              |         |         |         |         |
| T(k)                                        | 20      | 77.36   | 194.7   | 273.15  | 298.15  | 20           | 77.36   | 194.7   | 273.15  | 298.15  |
| A                                           | 0.0E+00 | 0.0E+00 | 1.2E+03 | 2.2E+03 | 2.5E+03 | 0.0E+00      | 0.0E+00 | 0.0E+00 | 8.3E+01 | 1.3E+02 |
| B                                           | 5.3E+03 | 5.4E+03 | 6.8E+03 | 8.0E+03 | 8.3E+03 | 9.4E+03      | 9.5E+03 | 9.7E+03 | 1.0E+04 | 1.0E+04 |
| C                                           | 1.1E+04 | 1.1E+04 | 1.2E+04 | 1.3E+04 | 1.4E+04 | 3.3E+04      | 3.4E+04 | 3.7E+04 | 3.8E+04 | 3.9E+04 |
| D                                           | 1.0E+03 | 3.1E+02 | 0.0E+00 | 0.0E+00 | 0.0E+00 | 3.0E+03      | 2.9E+03 | 2.7E+03 | 2.6E+03 | 2.6E+03 |
| E                                           | 4.8E+03 | 4.9E+03 | 6.4E+03 | 7.5E+03 | 7.9E+03 | 3.2E+02      | 2.4E+02 | 9.9E+01 | 8.5E+01 | 1.1E+02 |
| F                                           |         |         |         |         |         | 4.3E+02      | 3.2E+02 | 7.7E+01 | 0.0E+00 | 0.0E+00 |
| Cis - UTH...H <sub>2</sub> O                |         |         |         |         |         |              |         |         |         |         |
| A                                           | 4.3E+03 | 4.1E+03 | 3.8E+03 | 3.6E+03 | 3.5E+03 | 4.7E+02      | 1.9E+03 | 4.8E+03 | 6.8E+03 | 7.4E+03 |
| B                                           | 2.2E+03 | 2.1E+03 | 1.8E+03 | 1.5E+03 | 1.5E+03 | 2.1E+03      | 3.9E+03 | 7.6E+03 | 1.0E+04 | 1.1E+04 |
| C                                           | 1.1E+04 | 1.1E+04 | 9.2E+03 | 8.2E+03 | 7.9E+03 | 0.0E+00      | 0.0E+00 | 0.0E+00 | 0.0E+00 | 0.0E+00 |
| D                                           | 3.6E+03 | 3.2E+03 | 2.4E+03 | 1.9E+03 | 1.7E+03 | 4.5E+03      | 6.0E+03 | 9.1E+03 | 1.1E+04 | 1.2E+04 |
| E                                           | 4.3E+03 | 4.1E+03 | 3.8E+03 | 3.5E+03 | 3.5E+03 | 6.2E+02      | 2.2E+03 | 5.5E+03 | 7.7E+03 | 8.4E+03 |
| F                                           | 5.2E+01 | 6.0E+01 | 7.6E+01 | 8.7E+01 | 9.0E+01 | 2.3E+03      | 3.9E+03 | 7.2E+03 | 9.3E+03 | 1.0E+04 |
| G                                           | 0.0E+00 | 0.0E+00 | 0.0E+00 | 0.0E+00 | 0.0E+00 | 5.7E+02      | 2.2E+03 | 5.4E+03 | 7.6E+03 | 8.3E+03 |
| Cis - UTH...(H <sub>2</sub> O) <sub>2</sub> |         |         |         |         |         |              |         |         |         |         |
| A                                           | 9.9E+03 | 1.0E+04 | 1.0E+04 | 1.0E+04 | 1.0E+04 | 3.7E+03      | 3.6E+03 | 3.5E+03 | 3.4E+03 | 3.3E+03 |
| B                                           | 9.4E+03 | 9.3E+03 | 9.0E+03 | 8.9E+03 | 8.8E+03 | 7.5E+03      | 7.3E+03 | 6.8E+03 | 6.5E+03 | 6.4E+03 |
| C                                           | 1.3E+04 | 1.3E+04 | 1.3E+04 | 1.2E+04 | 1.2E+04 | 1.1E+04      | 1.1E+04 | 1.0E+04 | 9.9E+03 | 9.8E+03 |
| D                                           | 1.3E+04 | 1.3E+04 | 1.4E+04 | 1.4E+04 | 1.4E+04 | 1.0E+04      | 9.7E+03 | 8.9E+03 | 8.3E+03 | 8.2E+03 |
| E                                           |         |         |         |         |         | 5.0E+03      | 4.6E+03 | 3.9E+03 | 3.3E+03 | 3.2E+03 |
| F                                           | 8.4E+03 | 8.3E+03 | 8.0E+03 | 7.9E+03 | 7.8E+03 | 5.1E+03      | 4.8E+03 | 4.0E+03 | 3.5E+03 | 3.3E+03 |
| G                                           | 9.4E+03 | 9.3E+03 | 9.1E+03 | 8.9E+03 | 8.9E+03 | 8.3E+03      | 8.1E+03 | 7.7E+03 | 7.5E+03 | 7.4E+03 |
| H                                           | 0.0E+00 | 0.0E+00 | 0.0E+00 | 0.0E+00 | 0.0E+00 | 0.0E+00      | 0.0E+00 | 0.0E+00 | 0.0E+00 | 0.0E+00 |

| K <sub>eq</sub>                             |         |         |         |         |         |              |         |         |         |         |
|---------------------------------------------|---------|---------|---------|---------|---------|--------------|---------|---------|---------|---------|
| Gas                                         |         |         |         |         |         | CPCM - Water |         |         |         |         |
| Cis - UTH                                   |         |         |         |         |         |              |         |         |         |         |
| T(k)                                        | 20      | 77.36   | 194.7   | 273.15  | 298.15  | 20           | 77.36   | 194.7   | 273.15  | 298.15  |
| A                                           | 1.0E+00 | 1.0E+00 | 4.8E-01 | 3.8E-01 | 3.6E-01 | 1.0E+00      | 1.0E+00 | 1.0E+00 | 9.6E-01 | 9.5E-01 |
| B                                           | 1.9E-14 | 2.4E-04 | 1.5E-02 | 3.0E-02 | 3.5E-02 | 2.3E-25      | 3.7E-07 | 2.4E-03 | 1.3E-02 | 1.7E-02 |
| C                                           | 2.0E-28 | 6.0E-08 | 5.8E-04 | 3.0E-03 | 4.2E-03 | 1.9E-86      | 1.0E-23 | 1.5E-10 | 4.6E-08 | 1.5E-07 |
| D                                           | 1.8E-03 | 6.2E-01 | 1.0E+00 | 1.0E+00 | 1.0E+00 | 1.5E-08      | 1.1E-02 | 1.9E-01 | 3.1E-01 | 3.4E-01 |
| E                                           | 3.6E-13 | 5.0E-04 | 2.0E-02 | 3.6E-02 | 4.1E-02 | 1.5E-01      | 6.8E-01 | 9.4E-01 | 9.6E-01 | 9.6E-01 |
| F                                           |         |         |         |         |         | 7.4E-02      | 6.1E-01 | 9.5E-01 | 1.0E+00 | 1.0E+00 |
| Cis - UTH...H <sub>2</sub> O                |         |         |         |         |         |              |         |         |         |         |
| A                                           | 7.3E-12 | 1.7E-03 | 9.7E-02 | 2.1E-01 | 2.4E-01 | 6.0E-02      | 5.2E-02 | 5.1E-02 | 5.0E-02 | 5.0E-02 |
| B                                           | 1.5E-06 | 3.9E-02 | 3.4E-01 | 5.1E-01 | 5.5E-01 | 2.4E-06      | 2.2E-03 | 9.1E-03 | 1.2E-02 | 1.3E-02 |
| C                                           | 9.8E-31 | 5.5E-08 | 3.3E-03 | 2.7E-02 | 4.1E-02 | 1.0E+00      | 1.0E+00 | 1.0E+00 | 1.0E+00 | 1.0E+00 |
| D                                           | 3.9E-10 | 6.8E-03 | 2.3E-01 | 4.4E-01 | 5.0E-01 | 1.8E-12      | 8.6E-05 | 3.5E-03 | 7.1E-03 | 8.2E-03 |
| E                                           | 7.8E-12 | 1.7E-03 | 9.8E-02 | 2.1E-01 | 2.5E-01 | 2.5E-02      | 3.2E-02 | 3.4E-02 | 3.4E-02 | 3.4E-02 |
| F                                           | 7.3E-01 | 9.1E-01 | 9.5E-01 | 9.6E-01 | 9.6E-01 | 1.1E-06      | 2.4E-03 | 1.2E-02 | 1.6E-02 | 1.7E-02 |
| G                                           | 1.0E+00 | 1.0E+00 | 1.0E+00 | 1.0E+00 | 1.0E+00 | 3.1E-02      | 3.4E-02 | 3.5E-02 | 3.5E-02 | 3.5E-02 |
| Cis - UTH...(H <sub>2</sub> O) <sub>2</sub> |         |         |         |         |         |              |         |         |         |         |
| A                                           | 1.0E-26 | 1.7E-07 | 1.9E-03 | 1.1E-02 | 1.6E-02 | 2.3E-10      | 3.6E-03 | 1.2E-01 | 2.3E-01 | 2.6E-01 |
| B                                           | 3.2E-25 | 5.5E-07 | 3.8E-03 | 2.0E-02 | 2.8E-02 | 2.4E-20      | 1.2E-05 | 1.5E-02 | 5.8E-02 | 7.7E-02 |
| C                                           | 5.0E-35 | 1.8E-09 | 4.3E-04 | 4.4E-03 | 7.2E-03 | 5.3E-30      | 4.3E-08 | 1.7E-03 | 1.3E-02 | 1.9E-02 |
| D                                           | 6.4E-35 | 1.0E-09 | 2.0E-04 | 2.0E-03 | 3.3E-03 | 4.7E-27      | 2.9E-07 | 4.2E-03 | 2.6E-02 | 3.7E-02 |
| E                                           |         |         |         |         |         | 8.8E-14      | 7.5E-04 | 9.2E-02 | 2.3E-01 | 2.8E-01 |
| F                                           | 1.1E-22 | 2.5E-06 | 7.0E-03 | 3.1E-02 | 4.3E-02 | 3.7E-14      | 6.0E-04 | 8.4E-02 | 2.1E-01 | 2.6E-01 |
| G                                           | 3.0E-25 | 5.4E-07 | 3.7E-03 | 2.0E-02 | 2.8E-02 | 1.9E-22      | 3.3E-06 | 8.4E-03 | 3.7E-02 | 5.1E-02 |
| H                                           | 1.0E+00 | 1.0E+00 | 1.0E+00 | 1.0E+00 | 1.0E+00 | 1.0E+00      | 1.0E+00 | 1.0E+00 | 1.0E+00 | 1.0E+00 |



| C <sub>i</sub>                              |         |         |         |         |         |              |         |         |         |         |
|---------------------------------------------|---------|---------|---------|---------|---------|--------------|---------|---------|---------|---------|
| Gas                                         |         |         |         |         |         | CPCM - Water |         |         |         |         |
| Cis - UTH                                   |         |         |         |         |         |              |         |         |         |         |
| T(k)                                        | 20      | 77.36   | 194.7   | 273.15  | 298.15  | 20           | 77.36   | 194.7   | 273.15  | 298.15  |
| A                                           | 1.0E+00 | 6.2E-01 | 3.2E-01 | 2.6E-01 | 2.5E-01 | 8.2E-01      | 4.3E-01 | 3.2E-01 | 3.0E-01 | 2.9E-01 |
| B                                           | 1.9E-14 | 1.5E-04 | 9.9E-03 | 2.1E-02 | 2.4E-02 | 1.9E-25      | 1.6E-07 | 7.9E-04 | 3.8E-03 | 5.3E-03 |
| C                                           | 2.0E-28 | 3.7E-08 | 3.8E-04 | 2.1E-03 | 2.9E-03 | 1.6E-86      | 4.3E-24 | 4.9E-11 | 1.4E-08 | 4.5E-08 |
| D                                           | 1.8E-03 | 3.8E-01 | 6.6E-01 | 6.9E-01 | 6.9E-01 | 1.2E-08      | 4.8E-03 | 6.1E-02 | 9.6E-02 | 1.1E-01 |
| E                                           | 3.6E-13 | 3.1E-04 | 1.3E-02 | 2.5E-02 | 2.8E-02 | 1.2E-01      | 3.0E-01 | 3.0E-01 | 3.0E-01 | 2.9E-01 |
| F                                           |         |         |         |         |         | 6.0E-02      | 2.7E-01 | 3.1E-01 | 3.1E-01 | 3.1E-01 |
| Cis - UTH...H <sub>2</sub> O                |         |         |         |         |         |              |         |         |         |         |
| A                                           | 4.2E-12 | 8.6E-04 | 3.6E-02 | 6.2E-02 | 6.9E-02 | 5.4E-02      | 4.6E-02 | 4.4E-02 | 4.4E-02 | 4.3E-02 |
| B                                           | 8.4E-07 | 2.0E-02 | 1.2E-01 | 1.5E-01 | 1.6E-01 | 2.2E-06      | 1.9E-03 | 8.0E-03 | 1.0E-02 | 1.1E-02 |
| C                                           | 5.7E-31 | 2.8E-08 | 1.2E-03 | 7.9E-03 | 1.2E-02 | 9.0E-01      | 8.9E-01 | 8.7E-01 | 8.7E-01 | 8.6E-01 |
| D                                           | 2.3E-10 | 3.5E-03 | 8.3E-02 | 1.3E-01 | 1.4E-01 | 1.6E-12      | 7.6E-05 | 3.1E-03 | 6.2E-03 | 7.1E-03 |
| E                                           | 4.5E-12 | 8.8E-04 | 3.6E-02 | 6.3E-02 | 6.9E-02 | 2.2E-02      | 2.9E-02 | 3.0E-02 | 3.0E-02 | 3.0E-02 |
| F                                           | 4.2E-01 | 4.6E-01 | 3.5E-01 | 2.9E-01 | 2.7E-01 | 9.7E-07      | 2.1E-03 | 1.0E-02 | 1.4E-02 | 1.5E-02 |
| G                                           | 5.8E-01 | 5.1E-01 | 3.7E-01 | 3.0E-01 | 2.8E-01 | 2.8E-02      | 3.0E-02 | 3.0E-02 | 3.0E-02 | 3.0E-02 |
| Cis - UTH...(H <sub>2</sub> O) <sub>2</sub> |         |         |         |         |         |              |         |         |         |         |
| A                                           | 1.0E-26 | 1.7E-07 | 1.9E-03 | 1.0E-02 | 1.4E-02 | 2.3E-10      | 3.6E-03 | 8.9E-02 | 1.3E-01 | 1.3E-01 |
| B                                           | 3.2E-25 | 5.5E-07 | 3.7E-03 | 1.8E-02 | 2.5E-02 | 2.4E-20      | 1.2E-05 | 1.1E-02 | 3.2E-02 | 3.9E-02 |
| C                                           | 5.0E-35 | 1.8E-09 | 4.2E-04 | 4.0E-03 | 6.3E-03 | 5.3E-30      | 4.2E-08 | 1.3E-03 | 7.1E-03 | 9.8E-03 |
| D                                           | 6.4E-35 | 1.0E-09 | 2.0E-04 | 1.8E-03 | 2.8E-03 | 4.7E-27      | 2.9E-07 | 3.2E-03 | 1.4E-02 | 1.9E-02 |
| E                                           |         |         |         |         |         | 8.8E-14      | 7.5E-04 | 7.0E-02 | 1.3E-01 | 1.4E-01 |
| F                                           | 1.1E-22 | 2.5E-06 | 6.8E-03 | 2.8E-02 | 3.7E-02 | 3.7E-14      | 6.0E-04 | 6.3E-02 | 1.2E-01 | 1.3E-01 |
| G                                           | 3.0E-25 | 5.4E-07 | 3.6E-03 | 1.8E-02 | 2.4E-02 | 1.9E-22      | 3.2E-06 | 6.3E-03 | 2.1E-02 | 2.6E-02 |
| H                                           | 1.0E+00 | 1.0E+00 | 9.8E-01 | 9.1E-01 | 8.8E-01 | 1.0E+00      | 1.0E+00 | 7.6E-01 | 5.5E-01 | 5.1E-01 |

**Thermodynamic data of the most stable conformers of the three reaction pathways:**

|                                    |          | Gas                 |                     |                            |                    |                                           |                  |  |
|------------------------------------|----------|---------------------|---------------------|----------------------------|--------------------|-------------------------------------------|------------------|--|
|                                    |          | Cis - UTH           |                     | Cis - UTH·H <sub>2</sub> O |                    | Cis - UTH·(H <sub>2</sub> O) <sub>2</sub> | H <sub>2</sub> O |  |
|                                    |          | A+2H <sub>2</sub> O | D+2H <sub>2</sub> O | F+H <sub>2</sub> O         | G+H <sub>2</sub> O | H                                         |                  |  |
| Electronic Energy (DLPNO-CCSD(T1)) | Ha       | -1082.59487         | -1082.59437         | -1082.63718                | -1082.63719        | -1082.67452                               | -76.35984        |  |
| Thermal Correction. Enthalpy       | Ha       | 0.11853             | 0.11853             | 0.12247                    | 0.12246            | 0.12574                                   | 0.02536          |  |
| Entropy                            | J/mole-K | 528.771             | 541.609             | 514.346                    | 514.485            | 517.788                                   | 45.104           |  |
|                                    |          | CPCM -Water         |                     |                            |                    |                                           |                  |  |
|                                    |          | Cis - UTH           |                     | Cis - UTH·H <sub>2</sub> O |                    | Cis - UTH·(H <sub>2</sub> O) <sub>2</sub> | H <sub>2</sub> O |  |
|                                    |          | A+2H <sub>2</sub> O | F+2H <sub>2</sub> O | C+H <sub>2</sub> O         | G+H <sub>2</sub> O | H                                         |                  |  |
| Electronic Energy (DLPNO-CCSD(T1)) | Ha       | -1082.93927         | -1082.93821         | -1082.95178                | -1082.9526         | -1082.96687                               | -76.36946        |  |
| Thermal Correction. Enthalpy       | Ha       | 0.11731             | 0.11643             | 0.12009                    | 0.12092            | 0.12428                                   | 0.02525          |  |
| Entropy                            | J/mole-K | 540.500             | 542.540             | 549.993                    | 522.138            | 518.559                                   | 45.119           |  |

| Gas    |                        |          |                            |          |                                           |
|--------|------------------------|----------|----------------------------|----------|-------------------------------------------|
|        | Cis - UTH              |          | Cis - UTH·H <sub>2</sub> O |          | Cis - UTH·(H <sub>2</sub> O) <sub>2</sub> |
| T(k)   | $\Delta G(T)$ (J/mole) |          |                            |          |                                           |
| 20     | 189982                 | 191030   | 89520                      | 89468    | 0                                         |
| 77.36  | 189352                 | 189663   | 89717                      | 89657    | 0                                         |
| 194.7  | 188064                 | 186868   | 90121                      | 90045    | 0                                         |
| 273.15 | 187202                 | 184999   | 90391                      | 90304    | 0                                         |
| 298.15 | 186927                 | 184404   | 90477                      | 90387    | 0                                         |
|        | K <sub>eq</sub>        |          |                            |          |                                           |
| 20     | 0.0E+00                | 0.0E+00  | 1.5E-234                   | 2.1E-234 | 1.0E+00                                   |
| 77.36  | 1.4E-128               | 8.5E-129 | 2.6E-61                    | 2.9E-61  | 1.0E+00                                   |
| 194.7  | 3.5E-51                | 7.3E-51  | 6.6E-25                    | 6.9E-25  | 1.0E+00                                   |
| 273.15 | 1.6E-36                | 4.2E-36  | 5.2E-18                    | 5.4E-18  | 1.0E+00                                   |
| 298.15 | 1.8E-33                | 4.9E-33  | 1.4E-16                    | 1.5E-16  | 1.0E+00                                   |
|        | C <sub>i</sub>         |          |                            |          |                                           |
| 20     | 0.0E+00                | 0.0E+00  | 1.5E-234                   | 2.1E-234 | 1.0E+00                                   |
| 77.36  | 1.4E-128               | 8.5E-129 | 2.6E-61                    | 2.9E-61  | 1.0E+00                                   |
| 194.7  | 3.5E-51                | 7.3E-51  | 6.6E-25                    | 6.9E-25  | 1.0E+00                                   |
| 273.15 | 1.6E-36                | 4.2E-36  | 5.2E-18                    | 5.4E-18  | 1.0E+00                                   |
| 298.15 | 1.8E-33                | 4.9E-33  | 1.4E-16                    | 1.5E-16  | 1.0E+00                                   |

| CPCM -Water |                 |                            |                                           |         |         |
|-------------|-----------------|----------------------------|-------------------------------------------|---------|---------|
|             | Cis - UTH       | Cis - UTH·H <sub>2</sub> O | Cis - UTH·(H <sub>2</sub> O) <sub>2</sub> |         |         |
| T(k)        | DG(T) (J/mole)  |                            |                                           |         |         |
| 20          | 53718           | 54152                      | 27987                                     | 28562   | 0       |
| 77.36       | 52460           | 52776                      | 26184                                     | 28357   | 0       |
| 194.7       | 49885           | 49962                      | 22496                                     | 27937   | 0       |
| 273.15      | 48164           | 48081                      | 20030                                     | 27656   | 0       |
| 298.15      | 47616           | 47482                      | 19244                                     | 27567   | 0       |
|             | K <sub>eq</sub> |                            |                                           |         |         |
| 20          | 5.0E-141        | 3.7E-142                   | 8.0E-74                                   | 2.5E-75 | 1.0E+00 |
| 77.36       | 3.8E-36         | 2.3E-36                    | 2.1E-18                                   | 7.1E-20 | 1.0E+00 |
| 194.7       | 4.1E-14         | 3.9E-14                    | 9.2E-07                                   | 3.2E-08 | 1.0E+00 |
| 273.15      | 6.2E-10         | 6.4E-10                    | 1.5E-04                                   | 5.1E-06 | 1.0E+00 |
| 298.15      | 4.5E-09         | 4.8E-09                    | 4.3E-04                                   | 1.5E-05 | 1.0E+00 |
|             | C <sub>i</sub>  |                            |                                           |         |         |
| 20          | 5.0E-141        | 3.7E-142                   | 8.0E-74                                   | 2.5E-75 | 1.0E+00 |
| 77.36       | 3.8E-36         | 2.3E-36                    | 2.1E-18                                   | 7.1E-20 | 1.0E+00 |
| 194.7       | 4.1E-14         | 3.9E-14                    | 9.2E-07                                   | 3.2E-08 | 1.0E+00 |
| 273.15      | 6.2E-10         | 6.4E-10                    | 1.5E-04                                   | 5.1E-06 | 1.0E+00 |
| 298.15      | 4.5E-09         | 4.8E-09                    | 4.2E-04                                   | 1.5E-05 | 1.0E+00 |

## Conformers' geometries

### Gas

UTH: [UO<sub>2</sub>(OH)<sub>2</sub>]-

#### A, 0Ag

Cis:

-2 1

|   |             |             |             |
|---|-------------|-------------|-------------|
| U | -0.01591500 | -0.02210600 | -0.05866300 |
| O | 0.46089200  | 1.54508300  | 1.46331700  |
| O | -0.22159700 | -1.46902200 | -1.24397500 |
| O | -0.31080300 | 1.46362100  | -1.19613700 |
| O | -2.28948400 | 0.10131100  | 0.36860400  |
| O | 2.26551300  | 0.00552400  | -0.43800000 |
| O | 0.22636700  | -1.58350800 | 1.49566500  |
| H | 0.26315700  | 2.32680800  | 0.93486400  |
| H | -2.51877100 | 0.82904600  | -0.21878700 |
| H | 0.19129900  | -2.37540200 | 0.94724900  |
| H | 2.48138200  | 0.74918900  | 0.13785600  |

Trans:

-2 1

|   |             |             |             |
|---|-------------|-------------|-------------|
| U | -0.00449100 | -0.00004900 | -0.02546600 |
| O | -0.27095700 | -0.00388900 | 1.78357400  |
| O | 0.26804000  | 0.00370000  | -1.81960400 |
| O | -2.29602600 | -0.04729500 | -0.28347600 |
| O | 0.07593100  | -2.30774700 | 0.02940100  |
| O | -0.01854000 | 2.30918900  | 0.02686200  |
| O | 2.27451800  | 0.04632000  | 0.30773500  |
| H | -2.58453400 | -0.05159900 | 0.63544300  |
| H | 0.12114500  | -2.46878700 | 0.97816400  |
| H | 2.59124700  | 0.04968300  | -0.60208700 |
| H | 0.02157500  | 2.47295700  | 0.97538500  |

Transition state:

-2 1

|   |             |             |             |
|---|-------------|-------------|-------------|
| U | 0.00882300  | -0.02510400 | -0.04860400 |
| O | -0.39781400 | 1.20581600  | 1.52099800  |
| O | 0.43428200  | -1.07754900 | -1.50454600 |
| O | -0.96399200 | 1.66646400  | -0.70545100 |
| O | -2.07861700 | -0.97401400 | 0.05142600  |
| O | 2.05124900  | 1.00770600  | -0.23691800 |
| O | 0.89224200  | -1.66935300 | 1.22846800  |
| H | -0.82285400 | 1.76783100  | 0.60510100  |
| H | -2.61546800 | -0.17485000 | 0.09613300  |
| H | 1.19374700  | -2.30771900 | 0.57403900  |
| H | 1.93405100  | 1.75171100  | 0.36451400  |

#### B, 0Bg

Cis:

-2 1

|   |             |             |             |
|---|-------------|-------------|-------------|
| U | -0.05466300 | 0.00333300  | -0.07530900 |
| O | 0.71963200  | 1.57584300  | 1.30621500  |
| O | -0.61134200 | -1.37940700 | -1.21901400 |
| O | -0.33860800 | 1.47839400  | -1.22007300 |
| O | -2.18011100 | 0.06616600  | 0.82039100  |
| O | 2.23721600  | -0.33182800 | -0.54435500 |
| O | 0.55267400  | -1.49842700 | 1.42631500  |
| H | 0.49790000  | 2.34676500  | 0.77086700  |
| H | -2.52250500 | -0.78865800 | 0.53761800  |
| H | 1.45329100  | -1.54255500 | 1.05959100  |
| H | 2.56465300  | 0.39187900  | 0.00453800  |

Trans:

-2 1

|   |             |             |             |
|---|-------------|-------------|-------------|
| U | -0.00002900 | -0.00001000 | -0.00002100 |
| O | -0.00012100 | -0.40198700 | -1.77668400 |
| O | 0.00010800  | 0.40194800  | 1.77663900  |
| O | -1.65022400 | -1.58249000 | 0.31116000  |
| O | -1.64961400 | 1.58307200  | -0.31100800 |
| O | 1.64980600  | -1.58277900 | 0.31133100  |
| O | 1.65035500  | 1.58233200  | -0.31124200 |
| H | -1.86760900 | -1.80164300 | -0.60133300 |
| H | -1.86726600 | 1.80226100  | 0.60140600  |
| H | 1.86740600  | 1.80114500  | 0.60142500  |
| H | 1.86766400  | -1.80159600 | -0.60113400 |

Transition state:

-2 1

|   |             |             |             |
|---|-------------|-------------|-------------|
| U | -0.03898100 | 0.00037200  | -0.05530200 |
| O | 0.25102300  | 1.28960200  | 1.48595300  |
| O | -0.30974200 | -1.01060800 | -1.57951200 |
| O | -0.46220300 | 1.91087500  | -0.66145700 |
| O | -2.19670300 | -0.47510200 | 0.54975500  |
| O | 2.25774500  | 0.11437000  | -0.43895200 |
| O | 0.70799400  | -1.80954300 | 1.07906300  |
| H | -0.10782400 | 1.96246600  | 0.61170000  |
| H | -2.41165300 | -1.20596300 | -0.03932400 |
| H | 1.62130400  | -1.68387700 | 0.77927900  |
| H | 2.49947600  | 0.73636400  | 0.25736600  |

### C, 0Cg

Cis:

|      |             |             |             |
|------|-------------|-------------|-------------|
| -2 1 |             |             |             |
| U    | 0.00324700  | -0.06078500 | -0.10304200 |
| O    | 0.39440300  | 1.79656000  | 1.21182800  |
| O    | -0.53450600 | -1.81301300 | -0.31708000 |
| O    | 0.60529700  | 1.17987100  | -1.35591800 |
| O    | -2.15146200 | 0.55346300  | -0.65359000 |
| O    | 2.19619500  | -0.78432900 | -0.00409300 |
| O    | -0.56511400 | -0.56377100 | 2.01017000  |
| H    | 0.49656900  | 2.47668200  | 0.54024100  |
| H    | -2.63172200 | -0.18092500 | -0.25407100 |
| H    | -0.36910400 | 0.32531400  | 2.34424800  |
| H    | 2.64706600  | 0.02092000  | -0.28111600 |

Trans:

|      |             |             |             |
|------|-------------|-------------|-------------|
| -2 1 |             |             |             |
| U    | -0.00443600 | 0.00004900  | 0.02548300  |
| O    | -0.27051600 | 0.00306600  | -1.78367600 |
| O    | 0.26756300  | -0.00291900 | 1.81974800  |
| O    | 0.06417400  | 2.30825500  | -0.03017300 |
| O    | 2.27509300  | -0.03525500 | -0.30641300 |
| O    | -2.29613000 | 0.03572900  | 0.28422500  |
| O    | -0.00752700 | -2.30914200 | -0.02838100 |
| H    | 0.10740000  | 2.46856000  | -0.97915800 |
| H    | 2.59127600  | -0.03717300 | 0.60358800  |
| H    | 0.03330700  | -2.47233700 | -0.97695900 |
| H    | -2.58512200 | 0.03854400  | -0.63456300 |

Transition state:

|      |             |             |             |
|------|-------------|-------------|-------------|
| -2 1 |             |             |             |
| U    | -0.01223500 | -0.01206500 | -0.06148100 |
| O    | 0.59664600  | 0.88571000  | 1.65789400  |
| O    | -0.61308900 | -0.79489300 | -1.62013700 |
| O    | 0.98054400  | 1.73155800  | -0.49561900 |
| O    | -2.03939900 | 1.06021400  | 0.02958600  |
| O    | 2.03182000  | -1.03821400 | -0.27239200 |
| O    | -0.85692200 | -1.75336600 | 1.13300600  |
| H    | 0.95119100  | 1.60256000  | 0.82296800  |
| H    | -2.56695000 | 0.51014700  | -0.55912700 |
| H    | -0.65980800 | -1.44700500 | 2.02740400  |
| H    | 2.60442700  | -0.28380300 | -0.09367100 |

### D, 0Dg

Cis:

|      |             |             |             |
|------|-------------|-------------|-------------|
| -2 1 |             |             |             |
| U    | -0.00004000 | -0.04899500 | -0.08039300 |
| O    | -0.00332000 | 1.47418600  | 1.57468800  |
| O    | -0.00009100 | -1.56663200 | -1.16266200 |
| O    | 0.00489300  | 1.48934300  | -1.19271700 |
| O    | -2.31044300 | 0.07564100  | -0.14636400 |
| O    | 2.31105600  | 0.07349400  | -0.13864000 |
| O    | -0.00220000 | -1.42366800 | 1.66563800  |
| H    | 0.00509900  | 2.28431700  | 1.05510500  |
| H    | -2.41865000 | 0.99841800  | -0.40105500 |
| H    | -0.00086000 | -0.74480600 | 2.35545600  |
| H    | 2.41894700  | 0.99065000  | -0.41290000 |

Trans:

|      |             |             |             |
|------|-------------|-------------|-------------|
| -2 1 |             |             |             |
| U    | 0.02759300  | -0.00479800 | 0.03815400  |
| O    | 0.14224100  | 0.13189400  | -1.78298000 |
| O    | -0.02443300 | -0.05302600 | 1.84526200  |
| O    | -1.83944400 | 1.38540400  | -0.04276800 |
| O    | 1.54496100  | 1.73495700  | 0.11498800  |
| O    | -1.65797600 | -1.57579400 | -0.15431000 |
| O    | 1.63449800  | -1.64854600 | -0.05909000 |
| H    | -1.94848400 | 1.47614100  | -0.99597600 |
| H    | 1.68537500  | 1.89510100  | -0.82417300 |
| H    | 1.69052800  | -1.80516200 | -1.00790500 |
| H    | -2.36471100 | -0.92378400 | -0.05089700 |

Transition state:

|      |             |             |             |
|------|-------------|-------------|-------------|
| -2 1 |             |             |             |
| U    | -0.00321200 | -0.03834500 | -0.07626900 |
| O    | -0.00477500 | 1.06677300  | 1.64148600  |
| O    | -0.07290500 | -1.02180800 | -1.62533100 |
| O    | 0.34864900  | 1.94623700  | -0.50413800 |
| O    | -2.26503400 | 0.32991200  | -0.21241800 |
| O    | 2.28524900  | -0.22172000 | 0.00300700  |
| O    | -0.27048100 | -1.92370500 | 1.16391500  |
| H    | 0.19960000  | 1.83841700  | 0.80802100  |
| H    | -2.35155600 | 1.11196300  | 0.34427300  |
| H    | -0.21694100 | -1.54330600 | 2.04991400  |
| H    | 2.49880600  | 0.71517900  | 0.08237200  |

### E, 0Eg

Cis:

-2 1

|   |             |             |             |
|---|-------------|-------------|-------------|
| U | -0.03881500 | 0.00553000  | -0.05694500 |
| O | -0.14846700 | 1.85731100  | 1.15183100  |
| O | 0.10509300  | -1.57960300 | -1.07091600 |
| O | -0.57489900 | 1.12699700  | -1.47730500 |
| O | -2.18329400 | -0.62742900 | 0.51482700  |
| O | 2.29614000  | 0.24466500  | -0.32115700 |
| O | 0.76691400  | -1.03705500 | 1.71489100  |
| H | -0.44149300 | 2.46473400  | 0.46233500  |
| H | -2.20474600 | -1.51991300 | 0.15321200  |
| H | 1.68304500  | -0.84092000 | 1.45163200  |
| H | 2.44223800  | -0.49177000 | -0.92556400 |

Trans:

-2 1

|   |             |             |             |
|---|-------------|-------------|-------------|
| U | -0.02666100 | 0.00646200  | -0.01166000 |
| O | -0.14175900 | -0.20320700 | -1.81200500 |
| O | 0.02342800  | 0.12508000  | 1.80578200  |
| O | -1.50895500 | -1.75179900 | 0.18386300  |
| O | -1.67634600 | 1.60873200  | -0.02754100 |
| O | 1.84915600  | -1.36812800 | 0.06649900  |
| O | 1.64415600  | 1.59359400  | -0.19851700 |
| H | -1.65448000 | -1.97609000 | -0.74137300 |
| H | -1.75661400 | 1.81842200  | 0.90911800  |
| H | 2.35073800  | 0.93586600  | -0.25793300 |
| H | 1.99575900  | -1.40687600 | 1.01832000  |

Transition state:

-2 1

|   |             |             |             |
|---|-------------|-------------|-------------|
| U | -0.03347300 | 0.00619700  | -0.03683800 |
| O | -0.41181300 | 1.21656800  | 1.53241400  |
| O | 0.25635300  | -0.93849900 | -1.60769400 |
| O | -0.91053500 | 1.73046000  | -0.70300000 |
| O | -2.00105300 | -1.14605900 | 0.20233900  |
| O | 2.17786900  | 0.74200000  | -0.20196000 |
| O | 1.06306100  | -1.56261300 | 1.17183100  |
| H | -0.79588000 | 1.81441600  | 0.61451500  |
| H | -1.88999200 | -1.86182600 | -0.43237100 |
| H | 1.92002500  | -1.12597400 | 1.04968600  |
| H | 2.45433600  | 0.26843300  | -0.99421100 |

### UTH...H2O: [UO2(OH)4]2- ...H2O

#### A, 1Ag

Cis:

-2 1

|   |             |             |             |
|---|-------------|-------------|-------------|
| U | -0.24408300 | -0.02119300 | -0.05642600 |
| O | 0.80173100  | 1.09153700  | 1.46972200  |
| O | -1.23564500 | -1.07457700 | -1.24075100 |
| O | 0.95569500  | 0.76396800  | -1.32004600 |
| O | -1.73777500 | 1.71269300  | -0.20884000 |
| O | 1.49247100  | -1.66100100 | 0.17877000  |
| O | -1.48154300 | -0.96824600 | 1.51642100  |
| H | 1.74058400  | 1.06228500  | 1.20895900  |
| H | -1.25071700 | 2.44019000  | 0.19499600  |
| H | -2.11457000 | -1.46352400 | 0.98452600  |
| H | 1.63330300  | -1.90436800 | -0.74393000 |
| O | 3.32387400  | 0.33806500  | 0.08515900  |
| H | 2.67959500  | 0.69768000  | -0.56237700 |
| H | 2.81699100  | -0.50206000 | 0.26557000  |

Trans:

-2 1

|   |             |             |             |
|---|-------------|-------------|-------------|
| U | -0.25196100 | -0.00019900 | -0.03397700 |
| O | 0.61157700  | 0.45068600  | 1.51562200  |
| O | -1.11759300 | -0.47445000 | -1.55575500 |
| O | 1.13430800  | 1.36529400  | -1.19500700 |
| O | -1.80191600 | 1.63556600  | 0.38172500  |
| O | 1.52652700  | -1.51077500 | -0.52318300 |
| O | -1.48051700 | -1.58105600 | 1.07000800  |
| H | 2.61036800  | 0.44002600  | 1.16256300  |
| H | -1.52953600 | 1.98462300  | 1.23701700  |
| H | -2.05671300 | -1.92342600 | 0.37835700  |
| H | 1.57247300  | -1.37275900 | -1.47710300 |
| O | 3.34915200  | 0.13323300  | 0.60978400  |
| H | 1.97809300  | 1.31206900  | -0.72299800 |
| H | 2.83339900  | -0.57017000 | 0.12247700  |

Transition state:

-2 1

|   |             |             |             |
|---|-------------|-------------|-------------|
| U | -0.23697300 | -0.02007900 | -0.04852000 |
| O | 0.92674300  | 0.81850700  | 1.40187000  |
| O | -1.35121600 | -0.72458700 | -1.32562900 |
| O | 1.32470700  | 0.49977100  | -1.31043300 |
| O | -1.30911200 | 1.97486800  | -0.23046900 |
| O | 1.00824600  | -1.95191900 | 0.11127000  |
| O | -1.72882500 | -0.72721800 | 1.46829300  |
| H | 1.91214000  | 0.73052100  | 1.08383300  |
| H | -0.78004100 | 2.54760000  | 0.33672900  |
| H | -2.45576300 | -1.06542900 | 0.93465700  |
| H | 1.46526100  | -1.94636400 | -0.73801500 |
| O | 3.18670000  | 0.32252700  | 0.27391000  |
| H | 2.26573300  | 0.48655300  | -0.68873200 |
| H | 2.93623800  | -0.60117000 | 0.42489100  |

## B, 1Bg

Cis:

|      |             |             |             |
|------|-------------|-------------|-------------|
| -2 1 |             |             |             |
| U    | 0.23565200  | -0.02115600 | -0.04609500 |
| O    | -0.92576500 | -0.32902300 | 1.74447900  |
| O    | 1.34941400  | 0.39487800  | -1.49895000 |
| O    | -0.83360500 | -1.33488000 | -0.91223000 |
| O    | 1.84782700  | -1.51855200 | 0.62048000  |
| O    | -1.51148900 | 1.53090000  | -0.55746200 |
| O    | 1.23540500  | 1.68455400  | 0.97495200  |
| H    | -1.84147300 | -0.46458500 | 1.43826600  |
| H    | 2.41080400  | -1.57606800 | -0.15837600 |
| H    | 1.85871300  | 1.95835000  | 0.29237400  |
| H    | -1.35312900 | 2.16927100  | 0.14859200  |
| O    | -3.32204800 | -0.38198800 | 0.01220600  |
| H    | -2.64331100 | -0.97440200 | -0.37371900 |
| H    | -2.82949800 | 0.46665100  | -0.17423300 |

Trans:

|      |             |             |             |
|------|-------------|-------------|-------------|
| -2 1 |             |             |             |
| U    | 0.24621000  | -0.01662300 | 0.01616700  |
| O    | -0.71992900 | -0.05392500 | -1.53483900 |
| O    | 1.24895600  | 0.05197700  | 1.53078200  |
| O    | -1.51589400 | 1.34012500  | 0.88612500  |
| O    | 1.21906300  | 1.95982300  | -0.62632900 |
| O    | -0.97150200 | -1.72691400 | 0.83167700  |
| O    | 1.87379400  | -1.36866200 | -0.86302500 |
| H    | -2.66974200 | -0.27074700 | -1.05890000 |
| H    | 1.73844700  | 2.19410400  | 0.15049900  |
| H    | 2.42389300  | -1.57309900 | -0.09975500 |
| H    | -1.85762500 | -1.60699200 | 0.46098000  |
| O    | -3.37505400 | -0.15994800 | -0.39834600 |
| H    | -1.51489100 | 2.03948100  | 0.22039300  |
| H    | -2.84690500 | 0.40673900  | 0.23108700  |

Transition State:

|      |             |             |             |
|------|-------------|-------------|-------------|
| -2 1 |             |             |             |
| U    | 0.23171200  | -0.03116000 | -0.04850100 |
| O    | -1.08901500 | 0.14202900  | 1.52611200  |
| O    | 1.37164200  | -0.14952500 | -1.48482800 |
| O    | -1.30995700 | -1.06629000 | -0.94289700 |
| O    | 1.24272300  | -1.87242900 | 0.79475400  |
| O    | -0.59541400 | 2.01654100  | -0.68431800 |
| O    | 1.71060700  | 1.28817700  | 1.00958700  |
| H    | -2.02600600 | -0.04356000 | 1.17104500  |
| H    | 1.93241400  | -2.07979800 | 0.15593000  |
| H    | 1.41759200  | 2.11994700  | 0.61104100  |
| H    | -1.21756800 | 2.20508800  | 0.02814100  |
| O    | -3.32117500 | -0.25083100 | 0.18248000  |
| H    | -2.30064800 | -0.80397400 | -0.47049100 |
| H    | -3.19862300 | 0.60760100  | -0.24068900 |

## C, 1Cg

Cis:

|      |             |             |             |
|------|-------------|-------------|-------------|
| -2 1 |             |             |             |
| U    | 0.24189500  | -0.02476300 | -0.04025100 |
| O    | -0.83025100 | -0.50734500 | 1.77260900  |
| O    | 1.12292100  | 0.50143200  | -1.60374500 |
| O    | -0.83691000 | -1.33575700 | -0.91801400 |
| O    | 2.01442100  | -1.39120000 | 0.43617300  |
| O    | -1.49190600 | 1.59556900  | -0.36535000 |
| O    | 1.22540500  | 1.64023400  | 1.05252400  |
| H    | -1.74092200 | -0.67191600 | 1.46932400  |
| H    | 2.63084300  | -1.17995600 | -0.27292700 |
| H    | 0.51737500  | 2.29132800  | 0.94047400  |
| H    | -1.47773000 | 1.71346800  | -1.32204700 |
| O    | -3.29851600 | -0.42060800 | 0.04128800  |
| H    | -2.60868300 | -0.97671400 | -0.38081700 |
| H    | -2.81653900 | 0.44339500  | -0.05476000 |

Trans:

|      |             |             |             |
|------|-------------|-------------|-------------|
| -2 1 |             |             |             |
| U    | -0.25007500 | -0.00736100 | -0.02158500 |
| O    | 0.76121900  | -0.35312500 | 1.45561200  |
| O    | -1.30475000 | 0.34371000  | -1.45648900 |
| O    | 1.70759500  | 0.36082200  | -1.30839700 |
| O    | 0.00062700  | 2.26042800  | 0.27253800  |
| O    | -0.30563400 | -2.21468600 | -0.57292300 |
| O    | -2.12045000 | -0.12347100 | 1.29151600  |
| H    | 2.82752100  | -0.39974600 | 1.15158100  |
| H    | -0.56207400 | 2.62768000  | -0.41786200 |
| H    | -1.77123700 | -0.31093500 | 2.16912600  |
| H    | -0.82300300 | -2.23466700 | -1.38499500 |
| O    | 3.58208600  | -0.30194700 | 0.55009000  |
| H    | 1.72666200  | 1.31161900  | -1.12923700 |
| H    | 3.04346600  | -0.09063000 | -0.25834700 |

Transition state:

|      |             |             |             |
|------|-------------|-------------|-------------|
| -2 1 |             |             |             |
| U    | 0.21680400  | -0.03266300 | -0.03545800 |
| O    | -1.09791600 | -0.07441400 | 1.52838100  |
| O    | 1.35382200  | 0.01861800  | -1.48365500 |
| O    | -1.38185400 | -0.72964300 | -1.13961200 |
| O    | 1.07017200  | -2.07522900 | 0.44823100  |
| O    | -0.32826800 | 2.16855700  | -0.40885000 |
| O    | 1.77758500  | 0.94478900  | 1.24941700  |
| H    | -2.04964800 | -0.14998800 | 1.15229100  |
| H    | 1.74509200  | -2.21389000 | -0.22429800 |
| H    | 1.48639100  | 1.85263100  | 1.08091000  |
| H    | 0.06762100  | 2.34426900  | -1.26965500 |
| O    | -3.34659500 | -0.13782600 | 0.19568700  |
| H    | -2.35100300 | -0.54617300 | -0.59819100 |
| H    | -3.21998000 | 0.79934500  | 0.00423400  |



## D, 1Dg

Cis:

|      |             |             |             |
|------|-------------|-------------|-------------|
| -2 1 |             |             |             |
| U    | 0.24374500  | 0.00008000  | -0.06507400 |
| O    | -0.81517000 | -0.43335400 | 1.77770600  |
| O    | 1.23511400  | 0.57427800  | -1.53801600 |
| O    | -0.86772400 | -1.25250200 | -0.97903000 |
| O    | 1.88507500  | -1.53634200 | 0.39487700  |
| O    | -1.56267900 | 1.52999700  | -0.45655200 |
| O    | 1.30227700  | 1.49695800  | 1.17949400  |
| H    | -1.74595800 | -0.55291400 | 1.51398300  |
| H    | 2.61677100  | -1.22373800 | -0.14768900 |
| H    | 0.82868400  | 1.36169900  | 2.01161000  |
| H    | -1.65840600 | 1.46663300  | -1.41404600 |
| O    | -3.30230600 | -0.44027600 | 0.16036500  |
| H    | -2.63176200 | -0.99517900 | -0.29157800 |
| H    | -2.83055500 | 0.42610100  | 0.00377400  |

Trans:

|      |             |             |             |
|------|-------------|-------------|-------------|
| -2 1 |             |             |             |
| U    | 0.25324400  | -0.00406700 | -0.02946300 |
| O    | -0.63224200 | 0.27202700  | 1.54879600  |
| O    | 1.13985500  | -0.24810700 | -1.59237600 |
| O    | -1.05139800 | -1.79457000 | -0.49870900 |
| O    | 1.86088100  | -1.25409600 | 1.01520000  |
| O    | -1.56834700 | 1.08297400  | -1.11190600 |
| O    | 1.37944000  | 1.95774600  | 0.31527800  |
| H    | -2.61967500 | 0.00013300  | 1.23270300  |
| H    | 2.44312100  | -1.51968500 | 0.29589000  |
| H    | 1.04368300  | 2.26515400  | 1.16399700  |
| H    | -1.58026300 | 0.58346700  | -1.93712000 |
| O    | -3.35632300 | 0.00675800  | 0.59818800  |
| H    | -1.90715000 | -1.58495200 | -0.09709700 |
| H    | -2.85309500 | 0.44818700  | -0.14354100 |

Transition State:

|      |             |             |             |
|------|-------------|-------------|-------------|
| -2 1 |             |             |             |
| U    | 0.23517200  | 0.01114000  | -0.05509100 |
| O    | -0.89775000 | -0.27652200 | 1.61399000  |
| O    | 1.31606700  | 0.25856900  | -1.51650300 |
| O    | -1.24738500 | -1.03701400 | -1.05176100 |
| O    | 1.50057300  | -1.81161500 | 0.42958600  |
| O    | -1.15196400 | 1.77964700  | -0.57269300 |
| O    | 1.57219600  | 1.32247800  | 1.18697300  |
| H    | -1.87873000 | -0.38469700 | 1.27882400  |
| H    | 2.20085100  | -1.79256900 | -0.23057900 |
| H    | 1.13761300  | 1.29307500  | 2.04827700  |
| H    | -1.56492300 | 1.46323900  | -1.38468700 |
| O    | -3.14024000 | -0.39590800 | 0.36819800  |
| H    | -2.19987900 | -0.85126700 | -0.46641100 |
| H    | -2.94271500 | 0.53023800  | 0.16063000  |

## E, 1Eg

Cis:

|      |             |             |             |
|------|-------------|-------------|-------------|
| -2 1 |             |             |             |
| U    | 0.24411600  | -0.02117700 | -0.05641300 |
| O    | -0.80153200 | 1.09206800  | 1.46985800  |
| O    | 1.23574800  | -1.07480500 | -1.24042300 |
| O    | -0.95578600 | 0.76390900  | -1.31996200 |
| O    | -1.49221700 | -1.66105600 | 0.17841300  |
| O    | 1.73778100  | 1.71258600  | -0.20935000 |
| O    | 1.48133800  | -0.96821100 | 1.51666100  |
| H    | -1.74036800 | 1.06192300  | 1.20925600  |
| H    | -1.63406100 | -1.90382200 | -0.74428200 |
| H    | 2.11400200  | -1.46415200 | 0.98496400  |
| H    | 1.25046600  | 2.44040500  | 0.19359900  |
| O    | -3.32429400 | 0.33785000  | 0.08512000  |
| H    | -2.67937800 | 0.69761800  | -0.56170000 |
| H    | -2.81762100 | -0.50240100 | 0.26562000  |

Trans:

|      |             |             |             |
|------|-------------|-------------|-------------|
| -2 1 |             |             |             |
| U    | 0.25202200  | -0.00020200 | -0.03396900 |
| O    | -0.61200600 | 0.45106500  | 1.51533700  |
| O    | 1.11827900  | -0.47461600 | -1.55532900 |
| O    | -1.13400500 | 1.36515000  | -1.19557100 |
| O    | -1.52631100 | -1.51055600 | -0.52404000 |
| O    | 1.80188600  | 1.63568900  | 0.38208200  |
| O    | 1.47975100  | -1.58137700 | 1.07059300  |
| H    | -2.61020700 | 0.44043400  | 1.16203800  |
| H    | -1.57250400 | -1.37155700 | -1.47780800 |
| H    | 2.05587000  | -1.92413000 | 0.37907200  |
| H    | 1.52889000  | 1.98481500  | 1.23715400  |
| O    | -3.34955000 | 0.13308500  | 0.61025500  |
| H    | -1.97824900 | 1.31162400  | -0.72445900 |
| H    | -2.83413100 | -0.57016500 | 0.12258100  |

Transition state:

|      |             |             |             |
|------|-------------|-------------|-------------|
| -2 1 |             |             |             |
| U    | 0.23697300  | -0.02007800 | -0.04851900 |
| O    | -0.92675200 | 0.81848800  | 1.40187400  |
| O    | 1.35122300  | -0.72456600 | -1.32563300 |
| O    | -1.32471000 | 0.49977400  | -1.31042900 |
| O    | -1.00823000 | -1.95192900 | 0.11124700  |
| O    | 1.30910100  | 1.97487600  | -0.23044700 |
| O    | 1.72882900  | -0.72722500 | 1.46828700  |
| H    | -1.91214600 | 0.73049300  | 1.08383700  |
| H    | -1.46522300 | -1.94637800 | -0.73804900 |
| H    | 2.45577800  | -1.06540800 | 0.93464900  |
| H    | 0.78000500  | 2.54761000  | 0.33672600  |
| O    | -3.18670800 | 0.32252000  | 0.27390600  |
| H    | -2.26573600 | 0.48655500  | -0.68873600 |
| H    | -2.93624500 | -0.60117900 | 0.42487400  |

## F, 1Fg

Cis:

|      |             |             |             |
|------|-------------|-------------|-------------|
| -2 1 |             |             |             |
| U    | 0.24570200  | 0.00360000  | -0.08252900 |
| O    | -0.87211100 | 0.73915800  | 1.61946300  |
| O    | 1.35714400  | -0.74527400 | -1.38546000 |
| O    | -0.88757400 | 1.08543800  | -1.16520000 |
| O    | -1.48882900 | -1.64642800 | -0.16832200 |
| O    | 1.76118400  | 1.67973600  | 0.32888500  |
| O    | 1.29192800  | -1.38698400 | 1.30189800  |
| H    | -1.80118600 | 0.76618300  | 1.32561100  |
| H    | -1.25755000 | -2.15227200 | 0.61996300  |
| H    | 1.97772800  | -1.73915100 | 0.72342900  |
| H    | 1.25515600  | 2.26747400  | 0.90195000  |
| O    | -3.32296400 | 0.30902200  | 0.03117000  |
| H    | -2.67153800 | 0.80177200  | -0.51066900 |
| H    | -2.81739200 | -0.55256800 | 0.03287100  |

Trans:

|      |             |             |             |
|------|-------------|-------------|-------------|
| -2 1 |             |             |             |
| U    | -0.24625400 | -0.01681400 | 0.01608700  |
| O    | 0.71944200  | -0.05685500 | -1.53514500 |
| O    | -1.24934400 | 0.05372300  | 1.53036300  |
| O    | 1.51686600  | 1.33923400  | 0.88554100  |
| O    | 0.97033800  | -1.72710600 | 0.83314100  |
| O    | -1.21390300 | 1.96220100  | -0.62656100 |
| O    | -1.87618700 | -1.36669600 | -0.86241900 |
| H    | 2.67026000  | -0.27375900 | -1.05941900 |
| H    | 1.85637000  | -1.60659700 | 0.46212100  |
| H    | -2.42764700 | -1.56936500 | -0.09968500 |
| H    | -1.73384400 | 2.19843500  | 0.14927200  |
| O    | 3.37461300  | -0.16115900 | -0.39818400 |
| H    | 1.51028700  | 2.04356000  | 0.22515100  |
| H    | 2.84535400  | 0.40785100  | 0.22867000  |

Transition state:

|      |             |             |             |
|------|-------------|-------------|-------------|
| -2 1 |             |             |             |
| U    | 0.24271300  | 0.00121900  | -0.04915300 |
| O    | -1.06037300 | -0.01323300 | 1.54375300  |
| O    | 1.41368600  | -0.13829100 | -1.45892100 |
| O    | -1.31153700 | 0.97756900  | -1.00407900 |
| O    | -0.70291900 | -2.02805200 | -0.52302600 |
| O    | 1.03360200  | 2.06882100  | 0.45297600  |
| O    | 1.84411200  | -0.95327900 | 1.18597400  |
| H    | -2.00992600 | 0.08588800  | 1.17338500  |
| H    | -1.21320900 | -2.20640700 | 0.27529500  |
| H    | 2.57286500  | -1.06851700 | 0.56704800  |
| H    | 0.27053300  | 2.61611900  | 0.23382400  |
| O    | -3.28717600 | 0.14682300  | 0.17589500  |
| H    | -2.29315000 | 0.70611300  | -0.52453000 |
| H    | -3.09190300 | -0.72816800 | -0.18352300 |

## G, 1Gg

Cis:

|      |             |             |             |
|------|-------------|-------------|-------------|
| -2 1 |             |             |             |
| U    | -0.24550300 | 0.00342000  | -0.08232900 |
| O    | 0.87080700  | 0.74132100  | 1.62008800  |
| O    | -1.35509300 | -0.74756700 | -1.38551800 |
| O    | 0.88925400  | 1.08345700  | -1.16525000 |
| O    | -1.76086300 | 1.68081700  | 0.32390900  |
| O    | 1.48787000  | -1.64707700 | -0.16661800 |
| O    | -1.29484000 | -1.38362900 | 1.30304600  |
| H    | 1.80023200  | 0.76702500  | 1.32747600  |
| H    | -1.25446900 | 2.27092000  | 0.89421300  |
| H    | -1.98017800 | -1.73620300 | 0.72427200  |
| H    | 1.25817700  | -2.15521300 | 0.62059500  |
| O    | 3.32241300  | 0.30901900  | 0.03068700  |
| H    | 2.66806400  | 0.80136700  | -0.50814400 |
| H    | 2.81806400  | -0.55324400 | 0.03310900  |

Trans:

|      |             |             |             |
|------|-------------|-------------|-------------|
| -2 1 |             |             |             |
| U    | 0.25388900  | -0.02075400 | -0.04859700 |
| O    | -0.66715300 | -0.24774800 | 1.51988300  |
| O    | 1.21885900  | 0.22834000  | -1.56034400 |
| O    | -1.02674500 | -1.61811200 | -0.99406700 |
| O    | 1.86662100  | -1.44670500 | 0.74030100  |
| O    | -1.51150100 | 1.44893300  | -0.70827600 |
| O    | 1.23656100  | 1.85782500  | 0.82400100  |
| H    | -2.63421600 | -0.35152400 | 1.08730400  |
| H    | 1.54191800  | -1.67433300 | 1.61806900  |
| H    | 1.81594900  | 2.14361900  | 0.10947300  |
| H    | -1.41418500 | 2.11483200  | -0.01569600 |
| O    | -3.35788600 | -0.13819200 | 0.47363100  |
| H    | -1.90140000 | -1.49611200 | -0.59663900 |
| H    | -2.83589200 | 0.49817000  | -0.09266000 |

Transition state:

|      |             |             |             |
|------|-------------|-------------|-------------|
| -2 1 |             |             |             |
| U    | 0.23359900  | -0.00224900 | -0.06743500 |
| O    | -0.99441200 | -0.28529000 | 1.54025000  |
| O    | 1.38811600  | 0.29917900  | -1.46273600 |
| O    | -1.25782500 | -0.97954300 | -1.10215800 |
| O    | 1.31401600  | -1.94699900 | 0.40418500  |
| O    | -0.98567800 | 1.94302900  | -0.36306600 |
| O    | 1.67749600  | 1.13964000  | 1.21280900  |
| H    | -1.96617700 | -0.31652700 | 1.16034900  |
| H    | 0.70653200  | -2.39571100 | 1.00349200  |
| H    | 2.42629200  | 1.29402600  | 0.62719100  |
| H    | -1.17786200 | 2.19687500  | 0.54754700  |
| O    | -3.18133600 | -0.23244500 | 0.20737400  |
| H    | -2.23346600 | -0.74021400 | -0.57757600 |
| H    | -2.92942000 | 0.66787200  | -0.05026900 |

|       |             |             |             |
|-------|-------------|-------------|-------------|
| ... O | -1.30028200 | -1.11223100 | -1.29211000 |
| O     | 1.06478700  | 0.54022900  | -1.16455900 |
| O     | -1.68652800 | 1.78126200  | -0.66257600 |
| O     | 0.97547900  | -1.76323300 | 0.78768300  |
| O     | -2.00149400 | -0.66354500 | 1.35514300  |
| H     | 1.37642600  | 1.30334200  | 1.33966100  |
| H     | -1.23663400 | 2.53141700  | -0.25779300 |
| H     | -2.59386800 | -1.18270000 | 0.80000200  |
| H     | 1.07719000  | -1.44546400 | 1.69300200  |
| O     | 3.10036200  | 1.47449800  | 0.37021400  |
| H     | 3.32485100  | 0.52106700  | 0.30596800  |
| H     | 2.36073500  | 1.45445400  | -0.28273100 |
| O     | 3.20124700  | -1.18782800 | -0.52445600 |
| H     | 2.61277700  | -0.64571200 | -1.08859100 |
| H     | 2.46224500  | -1.54672800 | 0.05501200  |

Trans:

|      |             |             |             |
|------|-------------|-------------|-------------|
| -2 1 |             |             |             |
| U    | -0.45094800 | -0.02183800 | -0.03364500 |
| O    | 0.14265900  | 1.17337700  | 1.21754900  |
| O    | -0.99293100 | -1.22201200 | -1.26609700 |
| O    | 1.25878000  | 0.75587500  | -1.42049500 |
| O    | -1.91514600 | 1.53876000  | -0.80943500 |
| O    | 1.15191900  | -1.52326700 | 0.80385100  |
| O    | -2.00299800 | -0.83646000 | 1.41172900  |
| H    | 2.12784000  | 1.22332500  | 1.18120300  |
| H    | -1.82825300 | 2.28745300  | -0.20996600 |
| H    | -2.43173700 | -1.55055600 | 0.92849300  |
| H    | 1.49442000  | -1.09882000 | 1.59911400  |
| O    | 3.09310900  | 1.22114100  | 1.05010100  |
| H    | 3.22497900  | 0.45035700  | 0.45723300  |
| H    | 1.73939900  | 1.42208500  | -0.91248500 |
| O    | 3.25892200  | -0.97653600 | -0.79608800 |
| H    | 2.62780200  | -0.38175500 | -1.27438500 |
| H    | 2.57827100  | -1.39003900 | -0.20277500 |

Transition state:

|      |             |             |             |
|------|-------------|-------------|-------------|
| -2 1 |             |             |             |
| U    | -0.41544000 | -0.03659400 | -0.05106100 |
| O    | 0.36211000  | 1.12418300  | 1.40988800  |
| O    | -1.13283100 | -1.14682400 | -1.31182700 |
| O    | 1.22190900  | 0.66383500  | -1.13523700 |
| O    | -1.71236200 | 1.67170600  | -0.76856100 |
| O    | 0.98452400  | -1.71173600 | 0.80587000  |
| O    | -2.04823400 | -0.72949200 | 1.30342700  |
| H    | 1.36561600  | 1.37682600  | 1.18338300  |
| H    | -1.30796600 | 2.47083800  | -0.41285000 |
| H    | -2.58984200 | -1.31567000 | 0.76468000  |
| H    | 1.25123900  | -1.32405700 | 1.64826800  |
| O    | 2.68383900  | 1.59296800  | 0.54691100  |
| H    | 3.11243400  | 0.72445000  | 0.59849300  |
| H    | 1.95938800  | 1.23668000  | -0.42844200 |
| O    | 3.28520600  | -1.17823800 | -0.54872600 |
| H    | 2.73890600  | -0.54315400 | -1.05519100 |
| H    | 2.53739100  | -1.55045800 | -0.01474200 |

**C, 2Cg**

Cis:

|      |             |             |             |
|------|-------------|-------------|-------------|
| -2 1 |             |             |             |
| U    | -0.42831000 | 0.04866000  | 0.05787300  |
| O    | 0.35905300  | -1.25693700 | -1.46779900 |
| O    | -1.21173200 | 1.27523500  | 1.20464300  |
| O    | 1.02984700  | -0.46966000 | 1.22887600  |
| O    | -1.79741200 | -1.58433200 | 0.86716800  |
| O    | 1.09309300  | 1.58438100  | -0.95848200 |
| O    | -1.95470900 | 0.54077100  | -1.47109800 |
| H    | 1.29074000  | -1.46702000 | -1.26744300 |
| H    | -2.35518700 | -1.13178900 | 1.50815400  |
| H    | -1.74649600 | -0.10643700 | -2.15798500 |
| H    | 1.30360700  | 1.07004600  | -1.74749800 |
| O    | 3.01768400  | -1.56760400 | -0.27557500 |
| H    | 3.28210300  | -0.62307100 | -0.24192000 |
| H    | 2.28424000  | -1.49813500 | 0.37974800  |
| O    | 3.23892800  | 1.12646400  | 0.52279300  |
| H    | 2.62032200  | 0.64004800  | 1.10567600  |
| H    | 2.52718400  | 1.45307100  | -0.10720800 |

Trans:

|      |             |             |             |
|------|-------------|-------------|-------------|
| -2 1 |             |             |             |
| U    | -0.45100800 | 0.02193400  | -0.03361700 |
| O    | 0.14307300  | -1.17404800 | 1.21659500  |
| O    | -0.99330100 | 1.22284000  | -1.26520500 |
| O    | 1.15248500  | 1.52250500  | 0.80416700  |
| O    | -2.00284500 | 0.83540200  | 1.41253600  |
| O    | 1.25847400  | -0.75485900 | -1.42156900 |
| O    | -1.91499500 | -1.53847600 | -0.80997600 |
| H    | 2.12763300  | -1.22383700 | 1.18083300  |
| H    | -2.43172300 | 1.54992100  | 0.93005500  |
| H    | -1.82801700 | -2.28742600 | -0.21084700 |
| H    | 1.73834600  | -1.42174600 | -0.91372800 |
| O    | 3.09297100  | -1.22089100 | 1.05031600  |
| H    | 3.22468500  | -0.45043800 | 0.45692900  |
| H    | 1.49582200  | 1.09606300  | 1.59801400  |
| O    | 3.25911500  | 0.97599700  | -0.79589800 |
| H    | 2.57901200  | 1.39005800  | -0.20237900 |
| H    | 2.62715100  | 0.38172800  | -1.27384600 |

Transition state:

|      |             |             |             |
|------|-------------|-------------|-------------|
| -2 1 |             |             |             |
| U    | -0.41036800 | -0.05418900 | -0.04725600 |
| O    | 0.27956300  | 1.24800600  | 1.34242300  |
| O    | -1.03364100 | -1.28022300 | -1.24608400 |
| O    | 1.20117000  | 0.61267500  | -1.18832200 |
| O    | -1.81261100 | 1.47276400  | -0.94409000 |
| O    | 1.07887400  | -1.54797300 | 0.96524700  |
| O    | -2.02163500 | -0.63951500 | 1.39881800  |
| H    | 1.27811600  | 1.50156800  | 1.10509700  |
| H    | -2.30260800 | 1.00851000  | -1.63023600 |
| H    | -1.92534000 | 0.00930200  | 2.10690300  |
| H    | 1.42906600  | -1.01131700 | 1.68660200  |
| O    | 2.60861400  | 1.68469000  | 0.45970900  |
| H    | 3.07290900  | 0.83942000  | 0.55646100  |
| H    | 1.90559300  | 1.25084600  | -0.50346500 |
| O    | 3.31906400  | -1.12587600 | -0.53273000 |
| H    | 2.74416900  | -0.53309800 | -1.05990000 |
| H    | 2.59676500  | -1.47627000 | 0.04631500  |

## D, 2Dg

Cis:

|      |             |             |             |
|------|-------------|-------------|-------------|
| -2 1 |             |             |             |
| U    | 0.44355800  | -0.05575700 | 0.06840000  |
| O    | -0.36392200 | 1.09823200  | -1.58010900 |
| O    | 1.18110800  | -1.24677000 | 1.27342100  |
| O    | -1.02258400 | 0.57757100  | 1.18032500  |
| O    | 1.65724300  | 1.73104000  | 0.80560800  |
| O    | -1.04235300 | -1.67456600 | -0.86768400 |
| O    | 2.01939300  | -0.54589300 | -1.39255500 |
| H    | -1.29343100 | 1.32771700  | -1.39660600 |
| H    | 1.03791800  | 2.21950400  | 1.35788000  |
| H    | 1.77625000  | 0.04156500  | -2.12105700 |
| H    | -1.24813900 | -1.20139600 | -1.68341900 |
| O    | -3.02713400 | 1.51726700  | -0.41433400 |
| H    | -3.28155800 | 0.57426800  | -0.31853700 |
| H    | -2.29104500 | 1.49720200  | 0.24142300  |
| O    | -3.20466800 | -1.11507200 | 0.56351600  |
| H    | -2.59884800 | -0.57963100 | 1.11541600  |
| H    | -2.48515700 | -1.48403100 | -0.03340500 |

Trans:

|      |             |             |             |
|------|-------------|-------------|-------------|
| -2 1 |             |             |             |
| U    | 0.46100600  | -0.06804000 | -0.00230900 |
| O    | -0.10596500 | 1.67643900  | 0.05315000  |
| O    | 0.97283700  | -1.79040500 | -0.05775300 |
| O    | -1.22143300 | -0.51421500 | 1.57030900  |
| O    | 1.94870500  | 0.40147800  | 1.65250400  |
| O    | -1.22336700 | -0.41015600 | -1.59902100 |
| O    | 1.94859900  | 0.50730300  | -1.62327100 |
| H    | -2.07927500 | 1.71468800  | 0.05514400  |
| H    | 1.78305000  | 1.31785900  | 1.89731900  |
| H    | 1.78483900  | 1.43847800  | -1.80555400 |
| H    | -1.64857400 | 0.44841200  | -1.71487600 |
| O    | -3.05172800 | 1.65645900  | 0.05277000  |
| H    | -3.20951100 | 0.68841500  | 0.02212000  |
| H    | -1.64567700 | 0.33496100  | 1.74393600  |
| O    | -3.28561500 | -1.20839000 | -0.03807100 |
| H    | -2.62654700 | -1.13960400 | 0.70005700  |
| H    | -2.62708900 | -1.09168000 | -0.77062800 |

Transition state:

|      |             |             |             |
|------|-------------|-------------|-------------|
| -2 1 |             |             |             |
| U    | -0.42483700 | -0.06445700 | -0.06153800 |
| O    | 0.30274300  | 1.07985300  | 1.44782400  |
| O    | -1.03716700 | -1.22329400 | -1.32218000 |
| O    | 1.20127800  | 0.71673300  | -1.12234900 |
| O    | -1.64358400 | 1.66087600  | -0.87107800 |
| O    | 1.00915100  | -1.67620700 | 0.84967400  |
| O    | -2.09926900 | -0.63319800 | 1.30571500  |
| H    | 1.29776300  | 1.36538200  | 1.23316100  |
| H    | -0.97401500 | 2.26024200  | -1.22033900 |
| H    | -1.96370300 | -0.04869200 | 2.06205500  |
| H    | 1.33048800  | -1.21573700 | 1.63431600  |
| O    | 2.62140700  | 1.62559500  | 0.61021600  |
| H    | 3.07324500  | 0.76818800  | 0.63994400  |
| H    | 1.91427200  | 1.27948700  | -0.38966800 |
| O    | 3.28640600  | -1.11218200 | -0.55167700 |
| H    | 2.72947600  | -0.47617600 | -1.04559300 |
| H    | 2.54974600  | -1.50802600 | -0.02148500 |

## F, 2Fg

Cis:

|      |             |             |             |
|------|-------------|-------------|-------------|
| -2 1 |             |             |             |
| U    | 0.41789900  | 0.02462000  | -0.04971200 |
| O    | -0.42396600 | -1.21489000 | 1.47819400  |
| O    | 1.28016800  | 1.20187600  | -1.19960200 |
| O    | -1.07608900 | -0.46594200 | -1.19136700 |
| O    | 1.72068300  | -1.67002600 | -0.84430700 |
| O    | -0.90983900 | 1.81299500  | 0.76293700  |
| O    | 1.97081800  | 0.49377700  | 1.46002100  |
| H    | -1.35190400 | -1.43815000 | 1.27566700  |
| H    | 2.40744000  | -1.21546900 | -1.34324100 |
| H    | 1.64190300  | -0.01866900 | 2.21102600  |
| H    | -0.56571000 | 2.57078900  | 0.27750100  |
| O    | -3.07393600 | -1.58766500 | 0.28126600  |
| H    | -3.30889600 | -0.63631800 | 0.31844700  |
| H    | -2.34200000 | -1.49734400 | -0.37362100 |
| O    | -3.21636200 | 1.15443200  | -0.37201500 |
| H    | -2.63191900 | 0.65581300  | -0.98000600 |
| H    | -2.46742000 | 1.51783200  | 0.18674400  |

Trans:

|      |             |             |             |
|------|-------------|-------------|-------------|
| -2 1 |             |             |             |
| U    | 0.44712800  | 0.01420000  | -0.02154400 |
| O    | -0.25198800 | -1.04510500 | 1.28994000  |
| O    | 1.10470200  | 1.08860200  | -1.32072800 |
| O    | -1.30236700 | -0.62971800 | -1.41454900 |
| O    | 1.75116100  | -1.68625000 | -0.77864500 |
| O    | -0.97326400 | 1.75319700  | 0.67089500  |
| O    | 2.06890000  | 0.72821100  | 1.40614700  |
| H    | -2.18101900 | -1.33505400 | 1.14948300  |
| H    | 2.19466600  | -1.32803900 | -1.55473800 |
| H    | 1.89020200  | 0.26594000  | 2.23205800  |
| H    | -0.71647500 | 2.48253500  | 0.09519000  |
| O    | -3.11928700 | -1.41994700 | 0.89719600  |
| H    | -3.28689100 | -0.54960100 | 0.47597900  |
| H    | -1.80321300 | -1.30407900 | -0.93420200 |
| O    | -3.27802600 | 1.03093800  | -0.54991200 |
| H    | -2.66713000 | 0.48888900  | -1.11074200 |
| H    | -2.56459800 | 1.41353800  | 0.02622600  |

Transition state:

|      |             |             |             |
|------|-------------|-------------|-------------|
| -2 1 |             |             |             |
| U    | 0.40566100  | 0.03380100  | -0.04301800 |
| O    | -0.39247200 | -1.09925100 | 1.41293400  |
| O    | 1.14901400  | 1.11907400  | -1.31647000 |
| O    | -1.22200800 | -0.62092700 | -1.15994200 |
| O    | 1.72698800  | -1.65586000 | -0.76875600 |
| O    | -0.93036300 | 1.81127500  | 0.67763700  |
| O    | 2.01511700  | 0.67409100  | 1.38216300  |
| H    | -1.37474300 | -1.41996900 | 1.14186600  |
| H    | 2.30332500  | -1.25969500 | -1.43031400 |
| H    | 1.77388700  | 0.20533700  | 2.19089500  |
| H    | -0.67735200 | 2.54484200  | 0.10642400  |
| O    | -2.63743600 | -1.69914400 | 0.46997600  |
| H    | -3.11307700 | -0.86026600 | 0.57706600  |
| H    | -1.94105300 | -1.27083700 | -0.47007300 |
| O    | -3.32714900 | 1.09177200  | -0.36952700 |
| H    | -2.77233600 | 0.52235100  | -0.94146100 |
| H    | -2.57299800 | 1.46029800  | 0.15915500  |

## G, 2Gg

Cis:

|      |             |             |             |
|------|-------------|-------------|-------------|
| -2 1 |             |             |             |
| U    | -0.43151100 | -0.02730100 | -0.06221300 |
| O    | 0.43644900  | 1.12113900  | 1.52702200  |
| O    | -1.30075300 | -1.11156300 | -1.29231100 |
| O    | 1.06482100  | 0.54147600  | -1.16382800 |
| O    | -1.68599500 | 1.78193200  | -0.66170200 |
| O    | 0.97445600  | -1.76461500 | 0.78670400  |
| O    | -2.00193900 | -0.66352300 | 1.35449700  |
| H    | 1.37720300  | 1.30269800  | 1.34044300  |
| H    | -1.23459800 | 2.53290300  | -0.26016700 |
| H    | -2.59389100 | -1.18304000 | 0.79926500  |
| H    | 1.07900500  | -1.44472800 | 1.69097700  |
| O    | 3.10133300  | 1.47386300  | 0.37032800  |
| H    | 3.32569700  | 0.52042700  | 0.30602000  |
| H    | 2.36146700  | 1.45388000  | -0.28239400 |
| O    | 3.20045500  | -1.18835500 | -0.52513500 |
| H    | 2.61234500  | -0.64546700 | -1.08884700 |
| H    | 2.46120600  | -1.54785200 | 0.05368200  |

Trans:

|      |             |             |             |
|------|-------------|-------------|-------------|
| -2 1 |             |             |             |
| U    | -0.45097100 | -0.02187400 | -0.03352100 |
| O    | 0.14325900  | 1.17456700  | 1.21626600  |
| O    | -0.99343900 | -1.22305000 | -1.26475800 |
| O    | 1.25898300  | 0.75437700  | -1.42129000 |
| O    | -1.91439800 | 1.53872500  | -0.81066300 |
| O    | 1.15140800  | -1.52295700 | 0.80493900  |
| O    | -2.00380500 | -0.83491600 | 1.41168200  |
| H    | 2.12799300  | 1.22415600  | 1.18022100  |
| H    | -1.82654900 | 2.28788700  | -0.21191500 |
| H    | -2.43260400 | -1.54918600 | 0.92878900  |
| H    | 1.49584100  | -1.09662200 | 1.59837900  |
| O    | 3.09338500  | 1.22120700  | 1.04993000  |
| H    | 3.22519700  | 0.45106500  | 0.45623900  |
| H    | 1.73938800  | 1.42119800  | -0.91386500 |
| O    | 3.25886800  | -0.97698200 | -0.79583500 |
| H    | 2.62692000  | -0.38266300 | -1.27380300 |
| H    | 2.57903900  | -1.39121200 | -0.20231400 |

Transition state:

|      |             |             |             |
|------|-------------|-------------|-------------|
| -2 1 |             |             |             |
| U    | -0.41539100 | -0.03661300 | -0.05107300 |
| O    | 0.36183800  | 1.12462800  | 1.40975400  |
| O    | -1.13267900 | -1.14720900 | -1.31161300 |
| O    | 1.22184100  | 0.66359200  | -1.13521200 |
| O    | -1.71243000 | 1.67145400  | -0.76901600 |
| O    | 0.98462200  | -1.71154900 | 0.80627200  |
| O    | -2.04821300 | -0.72925400 | 1.30353000  |
| H    | 1.36510100  | 1.37765300  | 1.18316700  |
| H    | -1.30823200 | 2.47060400  | -0.41311700 |
| H    | -2.58931500 | -1.31620200 | 0.76510900  |
| H    | 1.25097600  | -1.32394300 | 1.64881300  |
| O    | 2.68358500  | 1.59333200  | 0.54670100  |
| H    | 3.11210100  | 0.72482100  | 0.59913400  |
| H    | 1.95955100  | 1.23654400  | -0.42846300 |
| O    | 3.28514500  | -1.17838600 | -0.54867300 |
| H    | 2.73888600  | -0.54331800 | -1.05517300 |
| H    | 2.53727500  | -1.55064300 | -0.01474300 |

## H, 2Hg

Cis:

|      |             |             |             |
|------|-------------|-------------|-------------|
| -2 1 |             |             |             |
| U    | -0.46568600 | -0.02284000 | -0.07507800 |
| O    | 1.05310000  | 0.04504600  | 1.57113400  |
| O    | -1.82060900 | 0.18736000  | -1.33570100 |
| O    | 0.35079900  | -1.64924600 | -0.61708100 |
| O    | 1.20587900  | 0.96395800  | -1.45071400 |
| O    | -1.96323900 | -1.07745700 | 1.27512500  |
| O    | -1.03984700 | 1.92684200  | 0.75969300  |
| H    | 1.63932300  | -0.72018000 | 1.46159300  |
| H    | 1.54193000  | 0.19169700  | -1.91967100 |
| H    | -0.41465800 | 2.00059700  | 1.49459700  |
| H    | -2.80996200 | -0.70183200 | 1.01098900  |
| O    | 3.08321500  | -1.56324000 | 0.08356300  |
| H    | 3.21224900  | -0.59342400 | 0.05127200  |
| H    | 2.16591800  | -1.66951400 | -0.25215500 |
| O    | 3.18549300  | 1.31779300  | 0.28478200  |
| H    | 2.53565800  | 1.05974100  | 0.97148400  |
| H    | 2.53435100  | 1.32575000  | -0.47730000 |

Trans:

|      |             |             |             |
|------|-------------|-------------|-------------|
| -2 1 |             |             |             |
| U    | 0.45457000  | 0.00643200  | 0.03368700  |
| O    | -0.83094200 | -0.05596300 | -1.29555600 |
| O    | 1.73719700  | 0.05338800  | 1.30500100  |
| O    | -0.61285300 | -1.60420600 | 1.20322900  |
| O    | -1.06762800 | 1.27826200  | 1.36117100  |
| O    | 1.76131400  | -1.43740200 | -1.14398500 |
| O    | 1.33569800  | 1.85445900  | -0.95384000 |
| H    | -2.30778000 | -1.32782600 | -0.93358700 |
| H    | -1.22968400 | 0.54944200  | 1.97622700  |
| H    | 0.83170600  | 1.98087800  | -1.76475000 |
| H    | 2.52980500  | -1.57886100 | -0.58167100 |
| O    | -3.16585500 | -1.46853700 | -0.49204900 |
| H    | -3.32509600 | -0.54282600 | -0.20687900 |
| H    | -1.49814000 | -1.75948700 | 0.84325100  |
| O    | -3.13912600 | 1.33242500  | -0.23134600 |
| H    | -2.53318300 | 1.07516400  | -0.94579400 |
| H    | -2.43048400 | 1.39238600  | 0.49296900  |

Transition state:

|      |             |             |             |
|------|-------------|-------------|-------------|
| -2 1 |             |             |             |
| U    | 0.43449600  | 0.01924600  | 0.05697000  |
| O    | -0.99196200 | -0.23876900 | -1.38591300 |
| O    | 1.75135500  | 0.26094300  | 1.30462400  |
| O    | -0.51328900 | -1.54842600 | 0.99061800  |
| O    | -1.14181900 | 1.24745800  | 1.29851100  |
| O    | 1.88914000  | -1.28062000 | -1.08719200 |
| O    | 1.11998700  | 1.84318200  | -1.03545900 |
| H    | -1.70626600 | -0.96324700 | -1.04057200 |
| H    | -1.40702800 | 0.54716400  | 1.90777100  |
| H    | 0.57478100  | 1.84907900  | -1.83217400 |
| H    | 2.71970400  | -1.21323500 | -0.60551400 |
| O    | -2.61247500 | -1.73348200 | -0.22025000 |
| H    | -3.05991800 | -0.92697300 | 0.07794900  |
| H    | -1.54191100 | -1.73351000 | 0.49895000  |
| O    | -3.28415600 | 1.25371100  | -0.31730300 |
| H    | -2.71471000 | 0.86688700  | -1.00204200 |
| H    | -2.57249600 | 1.37118200  | 0.37326800  |

**CPCM - Water**

**UTH: [UO<sub>2</sub>(OH)<sub>4</sub>]<sup>2-</sup>**

**A, 0Aw**

Cis:  
-2 1

|   |             |             |             |
|---|-------------|-------------|-------------|
| U | 0.00380600  | 0.00992300  | -0.06164000 |
| O | -0.12302300 | -1.45754500 | 1.55990200  |
| O | 0.05037300  | 1.45471300  | -1.27078900 |
| O | 0.06874000  | -1.46958400 | -1.22494500 |
| O | 2.28986700  | -0.01026100 | 0.03756700  |
| O | -2.28197800 | 0.03794500  | -0.17324200 |
| O | -0.03307000 | 1.53434200  | 1.51623600  |
| H | -0.09574300 | -2.35695300 | 1.21360300  |
| H | 2.66982300  | -0.85614900 | -0.21938900 |
| H | -0.03616600 | 2.41867000  | 1.13232000  |
| H | -2.65530900 | -0.83536300 | -0.01344500 |

Trans:  
-2 1

|   |             |             |             |
|---|-------------|-------------|-------------|
| U | 0.00034100  | 0.00002300  | 0.01063200  |
| O | -0.17866000 | 0.04844800  | -1.79866800 |
| O | 0.17816600  | -0.05033400 | 1.81939600  |
| O | -2.20507000 | 0.53206700  | 0.24552900  |
| O | 0.54294900  | 2.21757500  | 0.03707600  |
| O | -0.53127900 | -2.21980900 | 0.02766000  |
| O | 2.20325500  | -0.53157100 | -0.23867100 |
| H | -2.62785200 | 0.64508500  | -0.61229300 |
| H | 0.57549800  | 2.57809800  | -0.85547100 |
| H | 2.63211200  | -0.64848400 | 0.61563700  |
| H | -0.68602900 | -2.54780100 | -0.86459800 |

Transition state:  
-2 1

|   |             |             |             |
|---|-------------|-------------|-------------|
| U | -0.00006600 | -0.01731200 | -0.05332900 |
| O | 0.00747400  | 1.20010800  | 1.55855500  |
| O | -0.00704900 | -1.05843800 | -1.57722100 |
| O | 0.02111500  | 1.94105600  | -0.66662100 |
| O | -2.26913300 | -0.02841100 | -0.10387000 |
| O | 2.26837200  | -0.06983600 | -0.09697100 |
| O | -0.02060800 | -1.85231400 | 1.21234400  |
| H | 0.01728400  | 1.93170300  | 0.66433900  |
| H | -2.64523100 | 0.67126500  | 0.44102800  |
| H | -0.02173000 | -2.69683600 | 0.74953800  |
| H | 2.65442200  | 0.62929300  | 0.44166600  |

**B, 0Bw**

Cis:  
-2 1

|   |             |             |             |
|---|-------------|-------------|-------------|
| U | -0.03150800 | 0.00201300  | -0.07136100 |
| O | 0.35923000  | 1.57746800  | 1.39423500  |
| O | -0.31881000 | -1.41663900 | -1.27521900 |
| O | -0.34294200 | 1.39547000  | -1.31063700 |
| O | -2.21000000 | -0.08028000 | 0.59425900  |
| O | 2.22951500  | -0.14077300 | -0.43766900 |
| O | 0.44809000  | -1.43581200 | 1.52989300  |
| H | 0.21843700  | 2.43295000  | 0.97068800  |
| H | -2.73530500 | -0.77967700 | 0.19376300  |
| H | 1.39503400  | -1.57399800 | 1.38578600  |
| H | 2.69990900  | 0.54002400  | 0.05609900  |

Trans:  
-2 1

|   |             |             |             |
|---|-------------|-------------|-------------|
| U | 0.00002200  | -0.00001400 | 0.00005000  |
| O | -0.00191200 | 0.28196600  | -1.79705700 |
| O | 0.00191400  | -0.28181600 | 1.79719600  |
| O | 1.60611600  | 1.59678700  | 0.25177300  |
| O | 1.62660300  | -1.57589700 | -0.25217500 |
| O | -1.62680300 | 1.57590500  | 0.25136700  |
| O | -1.60622300 | -1.59663700 | -0.25147000 |
| H | 1.87387800  | 1.95389000  | -0.60169000 |
| H | 1.90172500  | -1.92893400 | 0.60062000  |
| H | -1.87448800 | -1.95410000 | 0.60167800  |
| H | -1.90068500 | 1.92795500  | -0.60224200 |

Transition state:  
-2 1

|   |             |             |             |
|---|-------------|-------------|-------------|
| U | -0.00799700 | -0.00698100 | -0.04484400 |
| O | 0.54691100  | 1.08882100  | 1.56038200  |
| O | -0.48707000 | -0.93279900 | -1.56823800 |
| O | 0.64175900  | 1.84042900  | -0.65963200 |
| O | -2.12605000 | 0.78911100  | 0.09244700  |
| O | 2.09146200  | -0.83761400 | -0.26659300 |
| O | -0.56316900 | -1.76642300 | 1.20844100  |
| H | 0.73619100  | 1.79636500  | 0.66624200  |
| H | -2.74245100 | 0.30591200  | -0.46706900 |
| H | -0.82080300 | -2.56078400 | 0.72860800  |
| H | 2.73209200  | -0.35145800 | 0.26344900  |

### C, 0Cw

Cis:

|      |             |             |             |
|------|-------------|-------------|-------------|
| -2 1 |             |             |             |
| U    | -0.00463600 | -0.05240300 | -0.13427300 |
| O    | 0.30753600  | 1.67074900  | 1.36505200  |
| O    | -0.38878700 | -1.83845400 | -0.31411700 |
| O    | 0.36717100  | 1.38871800  | -1.21674800 |
| O    | -2.22348100 | 0.42099900  | -0.42892500 |
| O    | 2.21851000  | -0.59801600 | -0.19559500 |
| O    | -0.27084500 | -0.74546900 | 2.00282100  |
| H    | 0.47317200  | 2.48582000  | 0.88264600  |
| H    | -2.75723400 | -0.33869900 | -0.17291700 |
| H    | -0.10554600 | 0.11788000  | 2.41038900  |
| H    | 2.73528500  | 0.16788400  | -0.46694400 |

Trans:

|      |             |             |             |
|------|-------------|-------------|-------------|
| -2 1 |             |             |             |
| U    | -0.00001300 | -0.00027300 | 0.01064300  |
| O    | 0.15604300  | -0.07855200 | -1.79963200 |
| O    | -0.15742400 | 0.07667900  | 1.82053900  |
| O    | -0.94953000 | -2.07246500 | 0.03039900  |
| O    | -2.06260000 | 0.93815700  | -0.22510300 |
| O    | 2.06589800  | -0.93449400 | 0.24406100  |
| O    | 0.93828700  | 2.07739100  | 0.02163500  |
| H    | -1.07075900 | -2.41413900 | -0.86192200 |
| H    | -2.45822500 | 1.12604300  | 0.63260700  |
| H    | 1.14313700  | 2.37711900  | -0.87039000 |
| H    | 2.46163300  | -1.11763700 | -0.61463400 |

Transition state:

|      |             |             |             |
|------|-------------|-------------|-------------|
| -2 1 |             |             |             |
| U    | -0.00855300 | -0.00938800 | -0.05293000 |
| O    | 0.49296800  | 1.00638800  | 1.62005300  |
| O    | -0.44230300 | -0.85295300 | -1.63463100 |
| O    | 0.61146200  | 1.87721800  | -0.55860900 |
| O    | -2.14589800 | 0.72673000  | 0.09785700  |
| O    | 2.11851500  | -0.76415100 | -0.27334200 |
| O    | -0.56308300 | -1.88953200 | 1.04424500  |
| H    | 0.68450000  | 1.76404800  | 0.77027900  |
| H    | -2.74355300 | 0.24703100  | -0.48471900 |
| H    | -0.46946000 | -1.75280800 | 1.99548500  |
| H    | 2.74210600  | -0.22417300 | 0.22392500  |

### D, 0Dw

Cis:

|      |             |             |             |
|------|-------------|-------------|-------------|
| -2 1 |             |             |             |
| U    | 0.00041000  | -0.02140900 | -0.07208300 |
| O    | -0.01587100 | 1.43632500  | 1.56788800  |
| O    | 0.00976800  | -1.47817600 | -1.26439200 |
| O    | 0.00099600  | 1.43816500  | -1.25794700 |
| O    | -2.28956500 | -0.01731000 | -0.08113900 |
| O    | 2.29053000  | 0.00068800  | -0.06271300 |
| O    | 0.00251600  | -1.51591100 | 1.54280500  |
| H    | -0.01920500 | 2.34391700  | 1.24338300  |
| H    | -2.65202600 | 0.85602500  | -0.26154600 |
| H    | -0.00141000 | -1.00988000 | 2.36713400  |
| H    | 2.64788200  | 0.86932100  | -0.27337400 |

Trans:

|      |             |             |             |
|------|-------------|-------------|-------------|
| -2 1 |             |             |             |
| U    | -0.00000200 | -0.00001800 | 0.02167300  |
| O    | -0.00287700 | 0.00207200  | -1.79688800 |
| O    | 0.00259400  | -0.00194700 | 1.83931700  |
| O    | -1.03710500 | -2.03333100 | 0.03439700  |
| O    | -2.03296300 | 1.03730700  | 0.03725200  |
| O    | 2.03353000  | -1.03730900 | 0.03247500  |
| O    | 1.03744900  | 2.03310500  | 0.03516500  |
| H    | -1.20059100 | -2.34430900 | -0.86233400 |
| H    | -2.34628500 | 1.19889900  | -0.85898700 |
| H    | 1.19731700  | 2.34575400  | -0.86163500 |
| H    | 2.34467600  | -1.19787200 | -0.86474400 |

Transition state:

|      |             |             |             |
|------|-------------|-------------|-------------|
| -2 1 |             |             |             |
| U    | 0.00000000  | -0.02034900 | -0.06131300 |
| O    | 0.00000000  | 1.10688900  | 1.61335200  |
| O    | -0.00000300 | -0.98466400 | -1.63236700 |
| O    | 0.00000800  | 1.96344800  | -0.57281000 |
| O    | -2.26821200 | -0.03396600 | -0.10759000 |
| O    | 2.26821100  | -0.03397900 | -0.10758500 |
| O    | -0.00000300 | -1.96704800 | 1.06235700  |
| H    | 0.00000600  | 1.88492400  | 0.76086900  |
| H    | -2.63978500 | 0.68658800  | 0.41264000  |
| H    | 0.00000300  | -1.79142300 | 2.01181500  |
| H    | 2.63978000  | 0.68660300  | 0.41261000  |

### E, OEw

Cis:

|      |             |             |             |
|------|-------------|-------------|-------------|
| -2 1 |             |             |             |
| U    | 0.00000100  | 0.01080100  | -0.06089300 |
| O    | 0.00001100  | 1.53819700  | 1.51193000  |
| O    | -0.00000300 | -1.47286700 | -1.21904300 |
| O    | 0.00002300  | 1.45971000  | -1.26791200 |
| O    | -2.28792000 | 0.00887300  | -0.06858800 |
| O    | 2.28792200  | 0.00882400  | -0.06855300 |
| O    | -0.00003600 | -1.45707800 | 1.56782100  |
| H    | 0.00001800  | 2.42042400  | 1.12318500  |
| H    | -2.65613400 | -0.87176300 | -0.19259200 |
| H    | -0.00004100 | -2.35579800 | 1.21890100  |
| H    | 2.65612500  | -0.87180700 | -0.19262000 |

Trans:

|      |             |             |             |
|------|-------------|-------------|-------------|
| -2 1 |             |             |             |
| U    | -0.00024900 | -0.00006700 | -0.01075000 |
| O    | -0.17994000 | -0.00607700 | -1.82016500 |
| O    | 0.17913600  | 0.00734300  | 1.79910600  |
| O    | -2.26306200 | -0.11343500 | 0.23257200  |
| O    | -0.11908800 | 2.27840900  | -0.02778400 |
| O    | 0.10754500  | -2.27889200 | -0.03082100 |
| O    | 2.26524800  | 0.11229500  | -0.24403100 |
| H    | -2.70626600 | -0.13341500 | -0.62215600 |
| H    | -0.08048400 | 2.63757300  | 0.86501800  |
| H    | 2.70287700  | 0.13676900  | 0.61345900  |
| H    | 0.18810800  | -2.63187400 | 0.86170500  |

Transition state:

|      |             |             |             |
|------|-------------|-------------|-------------|
| -2 1 |             |             |             |
| U    | 0.00000200  | -0.00073900 | -0.03869300 |
| O    | 0.00008300  | 1.24111700  | 1.55553500  |
| O    | -0.00006300 | -1.04890500 | -1.55787700 |
| O    | 0.00027300  | 1.94994100  | -0.68120800 |
| O    | -2.26922900 | -0.01959800 | -0.06203400 |
| O    | 2.26921700  | -0.02011900 | -0.06191500 |
| O    | -0.00027400 | -1.82724800 | 1.23281000  |
| H    | 0.00021300  | 1.95813500  | 0.64933400  |
| H    | -2.62511800 | -0.70940600 | -0.63146200 |
| H    | -0.00030600 | -2.67227100 | 0.77073700  |
| H    | 2.62501300  | -0.70995300 | -0.63136900 |

### F, OFw

Cis:

|      |             |             |             |
|------|-------------|-------------|-------------|
| -2 1 |             |             |             |
| U    | -0.04691600 | 0.05658300  | 0.00000000  |
| O    | 2.13690800  | -0.16977600 | 0.00000000  |
| O    | -1.92416900 | -0.04230700 | 0.00000000  |
| O    | 0.24510100  | 1.91722100  | 0.00000000  |
| O    | -0.05350200 | 0.06213300  | 2.28944000  |
| O    | -0.05350200 | 0.06213300  | -2.28944000 |
| O    | -0.05350200 | -2.14323600 | 0.00000000  |
| H    | 2.57613900  | 0.68839800  | 0.00000000  |
| H    | -0.75786800 | -0.48823200 | 2.64710600  |
| H    | 0.87722400  | -2.40690700 | 0.00000000  |
| H    | -0.75786800 | -0.48823200 | -2.64710600 |

Trans:

|      |             |             |             |
|------|-------------|-------------|-------------|
| -2 1 |             |             |             |
| U    | 0.00000000  | 0.00000000  | 0.00000000  |
| O    | 0.00000600  | -0.00000700 | 1.81845000  |
| O    | -0.00000200 | 0.00000900  | -1.81845000 |
| O    | 1.58965000  | 1.63448900  | -0.03392100 |
| O    | -1.63448900 | 1.58964800  | 0.03392900  |
| O    | 1.63448700  | -1.58965300 | 0.03391700  |
| O    | -1.58965200 | -1.63448700 | -0.03392500 |
| H    | 1.84223200  | 1.89266000  | 0.85897600  |
| H    | -1.89267300 | 1.84223500  | -0.85896400 |
| H    | -1.84224000 | -1.89266700 | 0.85896900  |
| H    | 1.89265400  | -1.84223700 | -0.85898100 |

Transition state:

|      |             |             |             |
|------|-------------|-------------|-------------|
| -2 1 |             |             |             |
| U    | -0.04080400 | 0.02103200  | 0.00000000  |
| O    | 1.97605900  | 0.14587500  | 0.00000000  |
| O    | -1.88519400 | 0.02058300  | 0.00000000  |
| O    | 0.52308300  | 1.99264700  | 0.00000000  |
| O    | -0.07341900 | 0.02175100  | 2.26793000  |
| O    | -0.07341900 | 0.02175100  | -2.26793000 |
| O    | -0.07341900 | -2.22017900 | 0.00000000  |
| H    | 1.63192800  | 1.24789900  | 0.00000000  |
| H    | -0.92914100 | -0.24173200 | 2.62155500  |
| H    | 0.83083700  | -2.55882200 | 0.00000000  |
| H    | -0.92914100 | -0.24173200 | -2.62155500 |



**UTH...H<sub>2</sub>O: [UO<sub>2</sub>(OH)<sub>4</sub>]<sup>2-</sup> ...H<sub>2</sub>O**

**A, 1Aw**

Cis:  
-2 1

|   |             |             |             |
|---|-------------|-------------|-------------|
| U | -0.23270100 | -0.01241700 | -0.05155400 |
| O | 0.85831200  | 0.74303100  | 1.64646300  |
| O | -1.18703000 | -0.84618000 | -1.42851000 |
| O | 0.84631500  | 1.08103200  | -1.18201800 |
| O | -1.76413200 | 1.65892400  | 0.14819500  |
| O | 1.45333100  | -1.63898100 | -0.10410500 |
| O | -1.41226600 | -1.19082700 | 1.36491300  |
| H | 1.79224000  | 0.79504600  | 1.36315800  |
| H | -1.58584000 | 2.44972900  | -0.37002400 |
| H | -2.05109600 | -1.74522300 | 0.90058100  |
| H | 1.53942000  | -2.11906100 | -0.93444200 |
| O | 3.24446400  | 0.36888700  | 0.08314000  |
| H | 2.62848000  | 0.86030300  | -0.49527200 |
| H | 2.77331700  | -0.50548300 | 0.05435300  |

Trans:  
-2 1

|   |             |             |             |
|---|-------------|-------------|-------------|
| U | -0.23933600 | -0.00052200 | 0.03415500  |
| O | 0.59008000  | -0.27584200 | -1.57084400 |
| O | -1.06690100 | 0.30697600  | 1.61894300  |
| O | 1.14540200  | -1.48860500 | 1.01549200  |
| O | -1.75536500 | -1.62807900 | -0.42382800 |
| O | 1.43834700  | 1.54724600  | 0.51106800  |
| O | -1.53308400 | 1.58744600  | -0.93550200 |
| H | 2.63051000  | -0.36477100 | -1.17470900 |
| H | -1.61879200 | -2.02112800 | -1.29262300 |
| H | -2.14426400 | 1.98764900  | -0.30747600 |
| H | 1.45545700  | 1.80406800  | 1.43960100  |
| O | 3.29548100  | -0.12057000 | -0.51182200 |
| H | 2.01132600  | -1.36165800 | 0.59819300  |
| H | 2.77299200  | 0.57532400  | -0.03332300 |

Transition state:  
-2 1

|   |             |             |             |
|---|-------------|-------------|-------------|
| U | -0.22156900 | -0.01092000 | -0.05111500 |
| O | 0.91277800  | 0.57782800  | 1.51471200  |
| O | -1.26162100 | -0.58474000 | -1.44785400 |
| O | 1.24796800  | 0.87087100  | -1.21076600 |
| O | -1.42304000 | 1.89708200  | 0.02524600  |
| O | 1.09115700  | -1.87007100 | -0.10123900 |
| O | -1.64716400 | -0.97353200 | 1.35235800  |
| H | 1.91407500  | 0.52491000  | 1.14457400  |
| H | -1.06353400 | 2.54379400  | 0.64276200  |
| H | -2.41382300 | -1.37324300 | 0.92637500  |
| H | 1.02550100  | -2.44086800 | -0.87397600 |
| O | 3.06199300  | 0.29770000  | 0.27766600  |
| H | 2.21297800  | 0.67486900  | -0.59391000 |
| H | 2.85259100  | -0.64588000 | 0.17580100  |

**B, 1Bw**

Cis:  
-2 1

|   |             |             |             |
|---|-------------|-------------|-------------|
| U | 0.22896400  | 0.00809800  | -0.04941600 |
| O | -0.85284200 | -0.72353000 | 1.65402600  |
| O | 1.21935500  | 0.76159100  | -1.44090300 |
| O | -0.85519500 | -1.07872300 | -1.18923800 |
| O | 1.75092500  | -1.65695700 | 0.23035800  |
| O | -1.45891700 | 1.63267800  | -0.16168700 |
| O | 1.36142100  | 1.26816300  | 1.35027200  |
| H | -1.78812900 | -0.78804700 | 1.37548700  |
| H | 2.28107000  | -1.90498700 | -0.53328700 |
| H | 2.00290800  | 1.81255000  | 0.87817300  |
| H | -1.58844000 | 2.02403600  | -1.03231100 |
| O | -3.23715600 | -0.39009700 | 0.09363200  |
| H | -2.61894300 | -0.88103400 | -0.48421500 |
| H | -2.77384800 | 0.48743900  | 0.05071200  |

Trans:  
-2 1

|   |             |             |             |
|---|-------------|-------------|-------------|
| U | -0.23808600 | -0.00711700 | 0.02506400  |
| O | 0.63833300  | -0.01628000 | -1.57908300 |
| O | -1.13200800 | 0.01256900  | 1.60341100  |
| O | 1.07493500  | -1.66935700 | 0.79447700  |
| O | -1.75681600 | -1.47315200 | -0.79987900 |
| O | 1.44582500  | 1.41767100  | 0.83852400  |
| O | -1.40910900 | 1.79737300  | -0.66718600 |
| H | 2.65870700  | -0.20982600 | -1.14087500 |
| H | -2.38774800 | -1.78148200 | -0.14102800 |
| H | -2.01238100 | 2.12358600  | 0.00965300  |
| H | 1.61036800  | 2.14029000  | 0.22147300  |
| O | 3.30295400  | -0.13495900 | -0.41904700 |
| H | 1.94708300  | -1.53925700 | 0.39218900  |
| H | 2.77499900  | 0.45053800  | 0.18300900  |

Transition state:  
-2 1

|   |             |             |             |
|---|-------------|-------------|-------------|
| U | 0.23274000  | 0.00451400  | -0.04762000 |
| O | -1.08000200 | -0.09806100 | 1.50490800  |
| O | 1.44557000  | 0.12348500  | -1.42043900 |
| O | -1.36210700 | -0.67737100 | -1.17755700 |
| O | 0.91325300  | -2.10503200 | 0.34708500  |
| O | -0.47168200 | 2.10551400  | -0.43590600 |
| O | 1.78571100  | 0.77715200  | 1.33305400  |
| H | -2.04979500 | -0.16847000 | 1.12927400  |
| H | 1.56815900  | -2.44550100 | -0.27108300 |
| H | 2.61357500  | 1.03174800  | 0.91041300  |
| H | -1.33310100 | 2.27544700  | -0.03810400 |
| O | -3.27889400 | -0.27826100 | 0.24766000  |
| H | -2.33447500 | -0.52929100 | -0.59309700 |
| H | -3.49125300 | 0.64134800  | 0.05317300  |

### C, 1Cw

Cis:

|      |             |             |             |
|------|-------------|-------------|-------------|
| -2 1 |             |             |             |
| U    | 0.23318300  | 0.00143200  | -0.04736300 |
| O    | -1.15568200 | -0.11435200 | 1.57630900  |
| O    | 1.56339700  | 0.11457800  | -1.35195700 |
| O    | -1.27541000 | -0.13659600 | -1.25590000 |
| O    | 0.44498000  | -2.26670700 | -0.00613900 |
| O    | 0.04089800  | 2.27114900  | -0.03124900 |
| O    | 1.82225000  | 0.15371600  | 1.47060200  |
| H    | -2.07958900 | -0.16353400 | 1.26239200  |
| H    | 1.09202500  | -2.61128300 | -0.62961900 |
| H    | 2.69277700  | 0.23099800  | 1.06324500  |
| H    | 0.61094400  | 2.71245400  | -0.66884100 |
| O    | -3.58783800 | -0.13863100 | 0.06858900  |
| H    | -2.79347900 | -0.16772200 | -0.53252200 |
| H    | -3.79628800 | 0.80207200  | 0.10069800  |

Trans:

|      |             |             |             |
|------|-------------|-------------|-------------|
| -2 1 |             |             |             |
| U    | 0.23719900  | -0.00208100 | -0.02013600 |
| O    | -0.62537400 | -0.10960700 | 1.58729400  |
| O    | 1.09948800  | 0.13906600  | -1.60969600 |
| O    | -1.11108300 | -1.59542700 | -0.87487100 |
| O    | 1.73042700  | -1.56609900 | 0.66700100  |
| O    | -1.44660000 | 1.46645500  | -0.69037700 |
| O    | 1.48498600  | 1.70861700  | 0.79454000  |
| H    | -2.64593700 | -0.26779600 | 1.16736100  |
| H    | 2.33941100  | -1.84279500 | -0.02580400 |
| H    | 2.07461400  | 2.06994900  | 0.12357800  |
| H    | -1.44332900 | 1.61390500  | -1.64270600 |
| O    | -3.30446500 | -0.10319200 | 0.47402100  |
| H    | -1.98487000 | -1.44258800 | -0.48348500 |
| H    | -2.78118400 | 0.54227200  | -0.06972700 |

Transition state:

|      |             |             |             |
|------|-------------|-------------|-------------|
| -2 1 |             |             |             |
| U    | 0.22458400  | 0.00082300  | -0.04183100 |
| O    | -1.13598600 | -0.06795100 | 1.46695000  |
| O    | 1.47440700  | 0.06328800  | -1.38369000 |
| O    | -1.43704000 | -0.13451000 | -1.26860400 |
| O    | 0.39445100  | -2.24687100 | 0.01359000  |
| O    | 0.06596300  | 2.24667900  | -0.07005600 |
| O    | 1.86033900  | 0.15187600  | 1.44514300  |
| H    | -2.10779000 | -0.09718800 | 1.08248600  |
| H    | 1.05213100  | -2.61082300 | -0.58814600 |
| H    | 2.74432400  | 0.21517600  | 1.06649500  |
| H    | 0.67293100  | 2.68410500  | -0.67615700 |
| O    | -3.34418600 | -0.12715600 | 0.22173600  |
| H    | -2.40546200 | -0.13906300 | -0.65604400 |
| H    | -3.64147900 | 0.78926500  | 0.21922800  |

### D, 1Dw

Cis:

|      |             |             |             |
|------|-------------|-------------|-------------|
| -2 1 |             |             |             |
| U    | 0.23361500  | 0.01396700  | -0.06495400 |
| O    | -0.81468300 | -0.63749900 | 1.69033400  |
| O    | 1.21442600  | 0.70334800  | -1.49450900 |
| O    | -0.82203700 | -1.14966400 | -1.15317600 |
| O    | 1.78673700  | -1.59175500 | 0.33257200  |
| O    | -1.49985200 | 1.58564000  | -0.25563500 |
| O    | 1.33027700  | 1.37953800  | 1.26997500  |
| H    | -1.75374100 | -0.72858400 | 1.43125900  |
| H    | 2.43198800  | -1.77074100 | -0.35814000 |
| H    | 1.00672100  | 1.23238500  | 2.16866500  |
| H    | -1.66598400 | 1.90555100  | -1.14891700 |
| O    | -3.21277900 | -0.46184900 | 0.14320400  |
| H    | -2.59465000 | -0.96959700 | -0.41938000 |
| H    | -2.77360100 | 0.42391100  | 0.04012900  |

Trans:

|      |             |             |             |
|------|-------------|-------------|-------------|
| -2 1 |             |             |             |
| U    | -0.23988800 | -0.00248600 | 0.03228700  |
| O    | 0.58944400  | 0.05775200  | -1.59507900 |
| O    | -1.06602000 | -0.02909500 | 1.64689100  |
| O    | 1.09710000  | -1.70245400 | 0.68076000  |
| O    | -1.77655400 | -1.44959900 | -0.79271000 |
| O    | 1.47109500  | 1.37273200  | 0.81699400  |
| O    | -1.49493900 | 1.79777500  | -0.53902600 |
| H    | 2.63309400  | -0.17319500 | -1.21684200 |
| H    | -2.40717000 | -1.75630100 | -0.13274700 |
| H    | -1.31291300 | 2.09565900  | -1.43698200 |
| H    | 1.47834300  | 1.44918900  | 1.77747400  |
| O    | 3.29557100  | -0.09309900 | -0.51271300 |
| H    | 1.96864400  | -1.51787100 | 0.29848300  |
| H    | 2.78417000  | 0.49910800  | 0.09930100  |

Transition state:

|      |             |             |             |
|------|-------------|-------------|-------------|
| -2 1 |             |             |             |
| U    | 0.22070000  | 0.00808200  | -0.05318000 |
| O    | -0.89117500 | -0.31349300 | 1.60463100  |
| O    | 1.23316600  | 0.33980600  | -1.54368200 |
| O    | -1.19516000 | -1.12786900 | -1.04380900 |
| O    | 1.46642300  | -1.80435000 | 0.41368300  |
| O    | -1.17323100 | 1.77387800  | -0.42426200 |
| O    | 1.62001500  | 1.29186000  | 1.11304900  |
| H    | -1.89010100 | -0.36789300 | 1.22712500  |
| H    | 2.17583700  | -2.00729700 | -0.20459800 |
| H    | 1.35419800  | 1.32124200  | 2.04081500  |
| H    | -1.14025600 | 2.17913700  | -1.29738400 |
| O    | -3.03275400 | -0.35603200 | 0.32312800  |
| H    | -2.17062500 | -0.85790900 | -0.46227600 |
| H    | -2.85175300 | 0.55880400  | 0.04695100  |

## E, 1Ew

Cis:

|      |             |             |             |
|------|-------------|-------------|-------------|
| -2 1 |             |             |             |
| U    | 0.23273800  | -0.01243400 | -0.05164700 |
| O    | -0.85818300 | 0.74502400  | 1.64548300  |
| O    | 1.18713300  | -0.84831600 | -1.42721600 |
| O    | -0.84694200 | 1.07991000  | -1.18277100 |
| O    | -1.45337700 | -1.63920400 | -0.10222700 |
| O    | 1.76436600  | 1.65889700  | 0.14539000  |
| O    | 1.41249200  | -1.18923000 | 1.36592500  |
| H    | -1.79222600 | 0.79676900  | 1.36244600  |
| H    | -1.53913300 | -2.11930000 | -0.93259500 |
| H    | 2.05191800  | -1.74362100 | 0.90243300  |
| H    | 1.57756700  | 2.45489900  | -0.36174400 |
| O    | -3.24419200 | 0.36827500  | 0.08300100  |
| H    | -2.62751500 | 0.85854800  | -0.49568800 |
| H    | -2.77288800 | -0.50618800 | 0.05597000  |

Trans:

|      |             |             |             |
|------|-------------|-------------|-------------|
| -2 1 |             |             |             |
| U    | 0.23933100  | -0.00052400 | 0.03415900  |
| O    | -0.59007200 | -0.27582600 | -1.57085100 |
| O    | 1.06687100  | 0.30698600  | 1.61895900  |
| O    | -1.14541200 | -1.48860500 | 1.01546900  |
| O    | -1.43833700 | 1.54727200  | 0.51100900  |
| O    | 1.75534000  | -1.62810700 | -0.42382200 |
| O    | 1.53311600  | 1.58742800  | -0.93549800 |
| H    | -2.63047800 | -0.36475800 | -1.17474200 |
| H    | -1.45544000 | 1.80417000  | 1.43952100  |
| H    | 2.14427100  | 1.98757500  | -0.30741200 |
| H    | 1.61872100  | -2.02107900 | -1.29264500 |
| O    | -3.29541000 | -0.12058300 | -0.51179800 |
| H    | -2.01135200 | -1.36159800 | 0.59821400  |
| H    | -2.77291900 | 0.57535100  | -0.03332800 |

Transition state:

|      |             |             |             |
|------|-------------|-------------|-------------|
| -2 1 |             |             |             |
| U    | 0.22156900  | -0.01092100 | -0.05111600 |
| O    | -0.91278000 | 0.57783500  | 1.51470800  |
| O    | 1.26162400  | -0.58474700 | -1.44784900 |
| O    | -1.24797400 | 0.87084500  | -1.21077900 |
| O    | -1.09114000 | -1.87008200 | -0.10122100 |
| O    | 1.42302300  | 1.89709400  | 0.02522200  |
| O    | 1.64717600  | -0.97349800 | 1.35237000  |
| H    | -1.91407500 | 0.52492100  | 1.14457200  |
| H    | -1.02546000 | -2.44089700 | -0.87394400 |
| H    | 2.41382600  | -1.37322200 | 0.92638200  |
| H    | 1.06355300  | 2.54377100  | 0.64279700  |
| O    | -3.06200000 | 0.29770500  | 0.27766700  |
| H    | -2.21298200 | 0.67485500  | -0.59391800 |
| H    | -2.85261100 | -0.64587900 | 0.17581300  |

## F, 1Fw

Cis:

|      |             |             |             |
|------|-------------|-------------|-------------|
| -2 1 |             |             |             |
| U    | 0.23276300  | -0.01244000 | -0.05167800 |
| O    | -0.85858100 | 0.74479200  | 1.64526700  |
| O    | 1.18799000  | -0.84833300 | -1.42679100 |
| O    | -0.84683400 | 1.07991400  | -1.18264400 |
| O    | -1.45303100 | -1.63931100 | -0.10236100 |
| O    | 1.76383100  | 1.65951200  | 0.14548100  |
| O    | 1.41268300  | -1.18898500 | 1.36607700  |
| H    | -1.79266300 | 0.79622500  | 1.36234500  |
| H    | -1.53936100 | -2.12149200 | -0.93144200 |
| H    | 2.05188500  | -1.74329100 | 0.90216800  |
| H    | 1.57588800  | 2.45572900  | -0.36091000 |
| O    | -3.24457000 | 0.36797100  | 0.08290800  |
| H    | -2.62882500 | 0.85914000  | -0.49596600 |
| H    | -2.77305600 | -0.50626400 | 0.05469200  |

Trans:

|      |             |             |             |
|------|-------------|-------------|-------------|
| -2 1 |             |             |             |
| U    | -0.24169000 | -0.00658400 | -0.03862500 |
| O    | 0.61393700  | -0.15263600 | 1.56954100  |
| O    | -1.12074900 | 0.14607400  | -1.61767500 |
| O    | 1.10931700  | -1.57463800 | -0.92968700 |
| O    | 1.44168000  | 1.49507100  | -0.70453800 |
| O    | -1.76836900 | -1.55814300 | 0.60763200  |
| O    | -1.45098200 | 1.71001300  | 0.79087900  |
| H    | 2.64215300  | -0.28707900 | 1.15773700  |
| H    | 1.56733600  | 2.19087900  | -0.04870700 |
| H    | -2.07509300 | 2.05941800  | 0.14521500  |
| H    | -1.61030400 | -1.87139800 | 1.50478000  |
| O    | 3.29631400  | -0.13157700 | 0.45818700  |
| H    | 1.97387800  | -1.46094100 | -0.50608500 |
| H    | 2.76833700  | 0.50157000  | -0.09415200 |

Transition state:

|      |             |             |             |
|------|-------------|-------------|-------------|
| -2 1 |             |             |             |
| U    | 0.23942700  | -0.00672500 | -0.05596600 |
| O    | -1.08480700 | 0.23384800  | 1.46539600  |
| O    | 1.47694300  | -0.23665900 | -1.39306500 |
| O    | -1.39431300 | 0.42298500  | -1.24766400 |
| O    | -0.31136700 | -2.18637800 | -0.17775100 |
| O    | 0.80416500  | 2.17745000  | 0.02928600  |
| O    | 1.82300700  | -0.48038300 | 1.42057400  |
| H    | -2.06288400 | 0.23930800  | 1.09394100  |
| H    | -1.16322400 | -2.37628700 | 0.23141600  |
| H    | 2.68888700  | -0.67538600 | 1.04532600  |
| H    | 0.21722600  | 2.69006800  | 0.59632400  |
| O    | -3.29455500 | 0.20995900  | 0.23355000  |
| H    | -2.36442400 | 0.34554200  | -0.64145400 |
| H    | -3.49544600 | -0.73111000 | 0.18067900  |

## G, 1Gw

Cis:

-2 1

|   |             |             |             |
|---|-------------|-------------|-------------|
| U | -0.23280700 | -0.01245000 | -0.05168500 |
| O | 0.85845800  | 0.74524800  | 1.64514000  |
| O | -1.18776700 | -0.84861600 | -1.42681200 |
| O | 0.84660100  | 1.07954600  | -1.18302400 |
| O | -1.76418900 | 1.65921800  | 0.14546500  |
| O | 1.45340200  | -1.63919900 | -0.10205700 |
| O | -1.41232900 | -1.18895500 | 1.36635000  |
| H | 1.79242900  | 0.79660700  | 1.36182600  |
| H | -1.57674500 | 2.45532500  | -0.36128600 |
| H | -2.05168400 | -1.74337600 | 0.90278500  |
| H | 1.53983000  | -2.11974500 | -0.93209400 |
| O | 3.24482100  | 0.36806700  | 0.08309600  |
| H | 2.63004800  | 0.85988600  | -0.49616800 |
| H | 2.77242500  | -0.50574300 | 0.05470000  |

Trans:

-2 1

|   |             |             |             |
|---|-------------|-------------|-------------|
| U | 0.24169300  | -0.00658900 | -0.03862400 |
| O | -0.61384300 | -0.15248400 | 1.56959100  |
| O | 1.12058100  | 0.14602600  | -1.61774800 |
| O | -1.10920600 | -1.57489600 | -0.92942500 |
| O | 1.76852200  | -1.55796200 | 0.60767200  |
| O | -1.44176300 | 1.49494300  | -0.70468900 |
| O | 1.45083300  | 1.71023500  | 0.79072500  |
| H | -2.64210700 | -0.28673900 | 1.15780200  |
| H | 1.61054600  | -1.87124100 | 1.50482500  |
| H | 2.07486900  | 2.05952700  | 0.14492700  |
| H | -1.56794500 | 2.19017000  | -0.04834100 |
| O | -3.29626400 | -0.13155700 | 0.45817200  |
| H | -1.97372700 | -1.46126800 | -0.50573400 |
| H | -2.76826400 | 0.50132000  | -0.09449000 |

Transition state:

-2 1

|   |             |             |             |
|---|-------------|-------------|-------------|
| U | -0.23881000 | -0.00802100 | -0.05650400 |
| O | 1.06977600  | 0.26725100  | 1.47360500  |
| O | -1.46005500 | -0.27539400 | -1.40160400 |
| O | 1.37950800  | 0.49453100  | -1.24163700 |
| O | -0.89150600 | 2.14900100  | 0.05365600  |
| O | 0.41342400  | -2.15920600 | -0.18593500 |
| O | -1.81068700 | -0.55719200 | 1.40474600  |
| H | 2.04700600  | 0.26691000  | 1.10369500  |
| H | -0.32971200 | 2.67705900  | 0.63188000  |
| H | -2.66770500 | -0.77423000 | 1.02127000  |
| H | 1.27802200  | -2.30002700 | 0.21639500  |
| O | 3.27808000  | 0.22933400  | 0.23464900  |
| H | 2.34852000  | 0.39477500  | -0.63842700 |
| H | 3.46605800  | -0.71316600 | 0.16370300  |

## UTH...(H2O)2: [UO2(OH)4]2- ... (H2O)2

### A, 2Aw

Cis:

-2 1

|   |             |             |             |
|---|-------------|-------------|-------------|
| U | -0.41544000 | -0.01782200 | -0.04829700 |
| O | 0.56508300  | 1.03184400  | 1.50933900  |
| O | -1.39087600 | -1.01754300 | -1.27505000 |
| O | 1.06712200  | 0.46554400  | -1.21110700 |
| O | -1.55602400 | 1.84519800  | -0.64912700 |
| O | 0.75588600  | -1.93070200 | 0.61422300  |
| O | -1.98701200 | -0.47600600 | 1.40910400  |
| H | 1.48340900  | 1.28964900  | 1.28230900  |
| H | -1.10288900 | 2.67448600  | -0.46369700 |
| H | -2.71476600 | -0.97343500 | 1.01779700  |
| H | 0.51788700  | -2.72398100 | 0.12223700  |
| O | 3.07577400  | 1.49736600  | 0.32447500  |
| H | 3.32139800  | 0.54839800  | 0.35897700  |
| H | 2.38861300  | 1.42652900  | -0.37506700 |
| O | 3.13912400  | -1.20359500 | -0.31123100 |
| H | 2.61065200  | -0.70343200 | -0.96241900 |
| H | 2.36358700  | -1.59540900 | 0.17822400  |

Trans:

-2 1

|   |             |             |             |
|---|-------------|-------------|-------------|
| U | -0.43496700 | -0.01217500 | -0.02627500 |
| O | 0.28102100  | 1.00182900  | 1.31355600  |
| O | -1.11221700 | -1.03299900 | -1.35580800 |
| O | 1.31392500  | 0.62710800  | -1.39785100 |
| O | -1.66578400 | 1.74013800  | -0.73484200 |
| O | 0.87727600  | -1.80119600 | 0.66583800  |
| O | -2.09525100 | -0.67316000 | 1.34352900  |
| H | 2.15858600  | 1.32393000  | 1.14691700  |
| H | -1.56851200 | 2.53452100  | -0.19872700 |
| H | -2.71324300 | -1.28749600 | 0.93276200  |
| H | 0.67412400  | -2.59233700 | 0.15315200  |
| O | 3.07878800  | 1.40195900  | 0.83787800  |
| H | 3.25803600  | 0.50008500  | 0.49547500  |
| H | 1.88021400  | 1.24325200  | -0.90866000 |
| O | 3.22102600  | -1.08553700 | -0.45154800 |
| H | 2.65340900  | -0.55323500 | -1.05573700 |
| H | 2.48407700  | -1.47372000 | 0.08607300  |

Transition state:

-2 1

|   |             |             |             |
|---|-------------|-------------|-------------|
| U | -0.40565600 | -0.03007300 | -0.04418300 |
| O | 0.48312300  | 1.00169500  | 1.42750700  |
| O | -1.22750500 | -1.00778400 | -1.35337800 |
| O | 1.21871400  | 0.60171400  | -1.17776700 |
| O | -1.59431400 | 1.77998800  | -0.65682200 |
| O | 0.82338200  | -1.88203300 | 0.59216400  |
| O | -2.02577700 | -0.61285600 | 1.34421600  |
| H | 1.47759800  | 1.31093600  | 1.13754800  |
| H | -1.30780400 | 2.59744600  | -0.23479100 |
| H | -2.72238300 | -1.15365100 | 0.95502700  |
| H | 0.62544600  | -2.67457100 | 0.08079600  |
| O | 2.67687800  | 1.59155600  | 0.45563900  |
| H | 3.17297900  | 0.76084700  | 0.55189500  |
| H | 1.99710200  | 1.20831700  | -0.45568400 |
| O | 3.25355400  | -1.11970600 | -0.28646000 |
| H | 2.73333700  | -0.58412000 | -0.91628100 |
| H | 2.47961700  | -1.51907500 | 0.18553700  |

**B, 2Bw**

Cis:

|      |             |             |             |
|------|-------------|-------------|-------------|
| -2 1 |             |             |             |
| U    | -0.41821100 | -0.03002400 | -0.05061900 |
| O    | 0.38579300  | 1.19652300  | 1.48306100  |
| O    | -1.21024900 | -1.20550900 | -1.25497200 |
| O    | 1.03044300  | 0.54628800  | -1.20894400 |
| O    | -1.74698900 | 1.64906100  | -0.78688400 |
| O    | 0.98186800  | -1.71623800 | 0.81289200  |
| O    | -1.96500700 | -0.60714000 | 1.38401100  |
| H    | 1.33820900  | 1.37565900  | 1.33436500  |
| H    | -1.39308400 | 2.53786000  | -0.67649200 |
| H    | -2.60932600 | -1.21276100 | 0.99829100  |
| H    | 1.22672600  | -1.44814600 | 1.70686300  |
| O    | 2.99518100  | 1.47234700  | 0.43216200  |
| H    | 3.27170800  | 0.53525300  | 0.35256200  |
| H    | 2.32182600  | 1.46573900  | -0.28336900 |
| O    | 3.18512700  | -1.13599100 | -0.56813600 |
| H    | 2.60939200  | -0.58696700 | -1.13433500 |
| H    | 2.46061100  | -1.49918900 | 0.01357200  |

Trans:

|      |             |             |             |
|------|-------------|-------------|-------------|
| -2 1 |             |             |             |
| U    | -0.43648300 | -0.01531400 | -0.02727000 |
| O    | 0.10919400  | 1.01439400  | 1.37607500  |
| O    | -0.91994800 | -1.05292900 | -1.42524900 |
| O    | 1.25869900  | 0.91014800  | -1.30524500 |
| O    | -1.87289700 | 1.58093200  | -0.71970300 |
| O    | 1.09049400  | -1.63060300 | 0.66723900  |
| O    | -2.01944700 | -0.96081300 | 1.26077800  |
| H    | 2.08013900  | 1.08678500  | 1.32196800  |
| H    | -1.89101200 | 2.36879300  | -0.16564800 |
| H    | -2.53444100 | -1.63933500 | 0.81062200  |
| H    | 1.44129700  | -1.41977000 | 1.54074000  |
| O    | 3.01800300  | 1.17341100  | 1.08031400  |
| H    | 3.17473800  | 0.39756800  | 0.50331000  |
| H    | 1.80113300  | 1.46920500  | -0.73036400 |
| O    | 3.20591900  | -0.93211300 | -0.83710700 |
| H    | 2.59922000  | -0.28389200 | -1.26637100 |
| H    | 2.52525300  | -1.38984900 | -0.28219500 |

Transition state:

|      |             |             |             |
|------|-------------|-------------|-------------|
| -2 1 |             |             |             |
| U    | -0.40619000 | -0.03761700 | -0.04694300 |
| O    | 0.32292400  | 1.11590600  | 1.42384000  |
| O    | -1.05635900 | -1.13753500 | -1.35456800 |
| O    | 1.19868600  | 0.69503000  | -1.15365600 |
| O    | -1.74087300 | 1.61095800  | -0.79045200 |
| O    | 0.98056600  | -1.71623500 | 0.76089300  |
| O    | -2.00580800 | -0.73755000 | 1.30204200  |
| H    | 1.35156500  | 1.35460400  | 1.20709000  |
| H    | -1.55855800 | 2.47752600  | -0.41046900 |
| H    | -2.63019900 | -1.36015700 | 0.91220800  |
| H    | 1.27608000  | -1.47301200 | 1.64683100  |
| O    | 2.61115100  | 1.55843400  | 0.58536600  |
| H    | 3.07790000  | 0.70918700  | 0.64643400  |
| H    | 1.95093000  | 1.24328500  | -0.37917100 |
| O    | 3.27067300  | -1.08187100 | -0.55015100 |
| H    | 2.71710100  | -0.46566600 | -1.06865300 |
| H    | 2.53699500  | -1.48213800 | -0.02205700 |

**C, 2Cw**

Cis:

|      |             |             |             |
|------|-------------|-------------|-------------|
| -2 1 |             |             |             |
| U    | -0.41647100 | -0.04708700 | -0.05094100 |
| O    | 0.29194100  | 1.33143000  | 1.40686900  |
| O    | -1.09159000 | -1.35049900 | -1.18946300 |
| O    | 0.99957300  | 0.47038600  | -1.27506400 |
| O    | -1.79485800 | 1.54266900  | -0.86996900 |
| O    | 1.06418100  | -1.55665000 | 0.97118500  |
| O    | -1.96121400 | -0.59436700 | 1.41009700  |
| H    | 1.24946700  | 1.49504400  | 1.27298200  |
| H    | -2.08718700 | 1.48787200  | -1.78492400 |
| H    | -1.88565900 | -0.01788700 | 2.18225500  |
| H    | 1.34107200  | -1.16986900 | 1.81070500  |
| O    | 2.91328300  | 1.55095100  | 0.35650400  |
| H    | 3.23171500  | 0.62488500  | 0.31576000  |
| H    | 2.25074400  | 1.48844700  | -0.36573900 |
| O    | 3.21465100  | -1.08952900 | -0.52587100 |
| H    | 2.61594500  | -0.59998700 | -1.12239100 |
| H    | 2.51149800  | -1.41167600 | 0.10357100  |

Trans:

|      |             |             |             |
|------|-------------|-------------|-------------|
| -2 1 |             |             |             |
| U    | -0.43646500 | -0.01377600 | -0.02884600 |
| O    | 0.09972200  | 0.65478600  | 1.58147300  |
| O    | -0.91005800 | -0.68999300 | -1.63640800 |
| O    | 1.24910500  | 1.18654400  | -1.06933200 |
| O    | -1.84868200 | 1.71649800  | -0.30812100 |
| O    | 1.10386600  | -1.72897900 | 0.29010900  |
| O    | -2.04371700 | -1.24150300 | 0.96459600  |
| H    | 2.07329800  | 0.75788500  | 1.54257100  |
| H    | -2.31397800 | 1.71405000  | -1.15155300 |
| H    | -2.09639200 | -1.13483000 | 1.92060300  |
| H    | 1.46433000  | -1.70531900 | 1.18444800  |
| O    | 3.00691400  | 0.91352200  | 1.32000200  |
| H    | 3.16783600  | 0.29364400  | 0.57911300  |
| H    | 1.78306700  | 1.61510000  | -0.38489100 |
| O    | 3.21070500  | -0.69075900 | -1.03472200 |
| H    | 2.59658300  | 0.03435900  | -1.30061900 |
| H    | 2.53722500  | -1.26843800 | -0.59659400 |

Transition state:

|      |             |             |             |
|------|-------------|-------------|-------------|
| -2 1 |             |             |             |
| U    | -0.40520500 | -0.04359000 | -0.04638500 |
| O    | 0.27945300  | 1.12243000  | 1.43941300  |
| O    | -0.99806700 | -1.15282300 | -1.37097600 |
| O    | 1.18186900  | 0.71983400  | -1.16008100 |
| O    | -1.75439300 | 1.59006700  | -0.76806700 |
| O    | 1.03372200  | -1.65779000 | 0.78978000  |
| O    | -2.01976000 | -0.81449700 | 1.26581200  |
| H    | 1.30662700  | 1.36218700  | 1.22969800  |
| H    | -2.27896700 | 1.41426200  | -1.55598400 |
| H    | -2.00901300 | -0.38943600 | 2.13279300  |
| H    | 1.36385300  | -1.36561500 | 1.64827800  |
| O    | 2.57172800  | 1.57974700  | 0.60268500  |
| H    | 3.05754400  | 0.74115500  | 0.65462800  |
| H    | 1.91992700  | 1.26497400  | -0.37034000 |
| O    | 3.28497700  | -1.03218400 | -0.59034000 |
| H    | 2.71430700  | -0.41854600 | -1.09351800 |
| H    | 2.56834000  | -1.43697000 | -0.04392200 |

## D, 2Dw

Cis:

|      |             |             |             |
|------|-------------|-------------|-------------|
| -2 1 |             |             |             |
| U    | -0.42047800 | -0.04928600 | -0.05538700 |
| O    | 0.31361700  | 1.26307500  | 1.45920400  |
| O    | -1.09111500 | -1.35085900 | -1.20433600 |
| O    | 0.98948500  | 0.52777000  | -1.25016000 |
| O    | -1.78723000 | 1.56767500  | -0.85974400 |
| O    | 1.04654000  | -1.59474800 | 0.94128300  |
| O    | -1.99516300 | -0.58359700 | 1.36533000  |
| H    | 1.26817000  | 1.43710300  | 1.32325000  |
| H    | -1.44563200 | 2.13723900  | -1.55567000 |
| H    | -1.89093400 | -0.04050800 | 2.15863700  |
| H    | 1.33178500  | -1.20608300 | 1.77715400  |
| O    | 2.93304100  | 1.52626000  | 0.40681300  |
| H    | 3.23616800  | 0.59706700  | 0.33266600  |
| H    | 2.26625100  | 1.50146800  | -0.31282900 |
| O    | 3.19415500  | -1.09122700 | -0.55301800 |
| H    | 2.60319000  | -0.57851500 | -1.13658600 |
| H    | 2.48837300  | -1.42827700 | 0.06596300  |

Trans:

|      |             |             |             |
|------|-------------|-------------|-------------|
| -2 1 |             |             |             |
| U    | -0.43814500 | -0.02529700 | -0.03849200 |
| O    | 0.06471500  | 0.98407900  | 1.39413900  |
| O    | -0.87541000 | -1.04033800 | -1.46820600 |
| O    | 1.25746400  | 0.94757600  | -1.28226700 |
| O    | -1.88799000 | 1.56170300  | -0.72097800 |
| O    | 1.11020300  | -1.61969100 | 0.65418200  |
| O    | -2.03630900 | -1.04081000 | 1.18037200  |
| H    | 2.04906800  | 1.07398400  | 1.36659600  |
| H    | -1.90732300 | 2.34996400  | -0.16756800 |
| H    | -2.08790800 | -0.74965000 | 2.09722600  |
| H    | 1.44834100  | -1.41555600 | 1.53416300  |
| O    | 2.98637300  | 1.17857300  | 1.13111500  |
| H    | 3.15439000  | 0.41900300  | 0.53610900  |
| H    | 1.78242800  | 1.50880100  | -0.69358000 |
| O    | 3.22071400  | -0.88037200 | -0.83671400 |
| H    | 2.60773100  | -0.22960600 | -1.25377600 |
| H    | 2.54457200  | -1.35540600 | -0.29106300 |

Transition state:

|      |             |             |             |
|------|-------------|-------------|-------------|
| -2 1 |             |             |             |
| U    | -0.40838300 | -0.04921500 | -0.05751200 |
| O    | 0.28669300  | 1.10728000  | 1.42546200  |
| O    | -1.02402200 | -1.15710000 | -1.37470800 |
| O    | 1.18671200  | 0.70865500  | -1.15300700 |
| O    | -1.75530000 | 1.58918500  | -0.80403900 |
| O    | 1.00483500  | -1.69532600 | 0.77211100  |
| O    | -2.03315700 | -0.80278600 | 1.25342100  |
| H    | 1.31719700  | 1.35837400  | 1.21914200  |
| H    | -1.53122500 | 2.47212500  | -0.49018600 |
| H    | -1.97174800 | -0.42027500 | 2.13806500  |
| H    | 1.29160700  | -1.44302600 | 1.65832300  |
| O    | 2.57118000  | 1.58285900  | 0.60362400  |
| H    | 3.05552100  | 0.74274500  | 0.66027500  |
| H    | 1.93050400  | 1.26904400  | -0.36158500 |
| O    | 3.28751800  | -1.03039800 | -0.53156300 |
| H    | 2.72555700  | -0.42859900 | -1.05795200 |
| H    | 2.55819800  | -1.44155400 | -0.00534500 |

## E, 2Ew

Cis:

|      |             |             |             |
|------|-------------|-------------|-------------|
| -2 1 |             |             |             |
| U    | -0.41275100 | -0.02998100 | -0.05061900 |
| O    | 0.49477700  | 1.07735400  | 1.51324900  |
| O    | -1.31754400 | -1.06899600 | -1.29384000 |
| O    | 1.04478300  | 0.47109500  | -1.23762200 |
| O    | -1.59897500 | 1.80441400  | -0.64218600 |
| O    | 0.83497700  | -1.87432500 | 0.66106200  |
| O    | -1.98187500 | -0.54727400 | 1.40469600  |
| H    | 1.41356400  | 1.34365900  | 1.29531000  |
| H    | -2.16200500 | 1.71569300  | -1.41753600 |
| H    | -1.77624500 | -0.10667600 | 2.24024200  |
| H    | 0.59895700  | -2.69546100 | 0.21566000  |
| O    | 3.00201500  | 1.57043400  | 0.33249300  |
| H    | 3.28499400  | 0.63120400  | 0.35100900  |
| H    | 2.32668700  | 1.48660800  | -0.37629900 |
| O    | 3.17704100  | -1.11540100 | -0.34160600 |
| H    | 2.62474000  | -0.63563300 | -0.98882100 |
| H    | 2.42081800  | -1.51954100 | 0.16740000  |

Trans:

|      |             |             |             |
|------|-------------|-------------|-------------|
| -2 1 |             |             |             |
| U    | 0.43473500  | 0.01467300  | -0.02481900 |
| O    | -0.27755600 | -0.91473300 | 1.37717600  |
| O    | 1.10644200  | 0.95023600  | -1.41761500 |
| O    | -1.29902600 | -0.71119500 | -1.37092100 |
| O    | 1.65245200  | -1.79106100 | -0.60361700 |
| O    | -0.89068100 | 1.82980900  | 0.56915100  |
| O    | 2.10304500  | 0.79360200  | 1.27632800  |
| H    | -2.14948700 | -1.28354200 | 1.21501300  |
| H    | 2.16401600  | -1.67339700 | -1.41135500 |
| H    | 2.06494500  | 0.47803600  | 2.18586800  |
| H    | -0.68335700 | 2.59601100  | 0.02129000  |
| O    | -3.06517300 | -1.38559000 | 0.89997500  |
| H    | -3.24893500 | -0.50306500 | 0.51239000  |
| H    | -1.86113500 | -1.30836900 | -0.85403700 |
| O    | -3.22235100 | 1.03079400  | -0.51730900 |
| H    | -2.64744400 | 0.47008000  | -1.08839100 |
| H    | -2.49139000 | 1.45947000  | -0.00277500 |

Transition state:

|      |             |             |             |
|------|-------------|-------------|-------------|
| -2 1 |             |             |             |
| U    | -0.40461100 | -0.03511200 | -0.04497300 |
| O    | 0.46047900  | 0.95878800  | 1.46679900  |
| O    | -1.19342100 | -0.97222600 | -1.40113400 |
| O    | 1.19933100  | 0.65523200  | -1.16967800 |
| O    | -1.60394900 | 1.78942400  | -0.57102400 |
| O    | 0.86616100  | -1.87267000 | 0.55147000  |
| O    | -2.03159400 | -0.72935600 | 1.30284200  |
| H    | 1.44730100  | 1.29638000  | 1.18133600  |
| H    | -2.20168400 | 1.69978300  | -1.32047300 |
| H    | -1.90937900 | -0.37543300 | 2.19307600  |
| H    | 0.66968700  | -2.66502000 | 0.03907400  |
| O    | 2.63689900  | 1.62014400  | 0.49862400  |
| H    | 3.15244900  | 0.79823000  | 0.56458700  |
| H    | 1.96708400  | 1.25655200  | -0.42154300 |
| O    | 3.27247600  | -1.04914900 | -0.33780500 |
| H    | 2.73744200  | -0.50548400 | -0.94828200 |
| H    | 2.51023900  | -1.47621400 | 0.12900300  |

**F, 2Fw**

Cis:

|      |             |             |             |
|------|-------------|-------------|-------------|
| -2 1 |             |             |             |
| U    | 0.41284500  | 0.03057700  | -0.05055500 |
| O    | -0.49274000 | -1.07687500 | 1.51472500  |
| O    | 1.31538800  | 1.06968000  | -1.29538300 |
| O    | -1.04339300 | -0.47197600 | -1.23852000 |
| O    | 1.59775100  | -1.80412400 | -0.64194900 |
| O    | -0.83628200 | 1.87417700  | 0.66356100  |
| O    | 1.98340900  | 0.54626300  | 1.40353200  |
| H    | -1.41099800 | -1.34493700 | 1.29686200  |
| H    | 2.15095300  | -1.72428700 | -1.42526300 |
| H    | 1.77818300  | 0.10565300  | 2.23916200  |
| H    | -0.60897000 | 2.68968400  | 0.20332500  |
| O    | -2.99919000 | -1.57287100 | 0.33188300  |
| H    | -3.28488200 | -0.63460500 | 0.35143300  |
| H    | -2.32339700 | -1.48626500 | -0.37634500 |
| O    | -3.17904300 | 1.11443200  | -0.34027000 |
| H    | -2.62732500 | 0.63606900  | -0.98896600 |
| H    | -2.42251200 | 1.51598600  | 0.17024400  |

Trans:

|      |             |             |             |
|------|-------------|-------------|-------------|
| -2 1 |             |             |             |
| U    | 0.43471700  | 0.01465600  | -0.02487200 |
| O    | -0.27864600 | -0.91424000 | 1.37695500  |
| O    | 1.10748600  | 0.94980300  | -1.41748100 |
| O    | -1.29966400 | -0.71054300 | -1.37104400 |
| O    | 1.65129900  | -1.79202300 | -0.60299900 |
| O    | -0.88927200 | 1.83132100  | 0.56805700  |
| O    | 2.10299100  | 0.79232100  | 1.27670000  |
| H    | -2.15015400 | -1.28415700 | 1.21470900  |
| H    | 2.16324500  | -1.67573600 | -1.41068600 |
| H    | 2.06640100  | 0.47679400  | 2.18629300  |
| H    | -0.67949800 | 2.59749600  | 0.02110500  |
| O    | -3.06545100 | -1.38619900 | 0.89865500  |
| H    | -3.24936300 | -0.50296000 | 0.51272100  |
| H    | -1.86070800 | -1.30727200 | -0.85243600 |
| O    | -3.22193800 | 1.03154900  | -0.51550800 |
| H    | -2.64807400 | 0.47120000  | -1.08804700 |
| H    | -2.49021300 | 1.46034600  | -0.00211300 |

Transition state:

|      |             |             |             |
|------|-------------|-------------|-------------|
| -2 1 |             |             |             |
| U    | -0.40461400 | -0.03510200 | -0.04494900 |
| O    | 0.46057000  | 0.95856300  | 1.46692600  |
| O    | -1.19349400 | -0.97200000 | -1.40121800 |
| O    | 1.19924500  | 0.65544900  | -1.16964800 |
| O    | -1.60403800 | 1.78949000  | -0.57060700 |
| O    | 0.86621700  | -1.87274000 | 0.55111300  |
| O    | -2.03149100 | -0.72961100 | 1.30285500  |
| H    | 1.44737700  | 1.29618700  | 1.18145900  |
| H    | -2.20176100 | 1.69998300  | -1.32008200 |
| H    | -1.90925200 | -0.37580400 | 2.19313200  |
| H    | 0.66967700  | -2.66502200 | 0.03863800  |
| O    | 2.63694100  | 1.62005100  | 0.49872200  |
| H    | 3.15248900  | 0.79812100  | 0.56450500  |
| H    | 1.96705600  | 1.25662400  | -0.42146300 |
| O    | 3.27245400  | -1.04909500 | -0.33825200 |
| H    | 2.73737200  | -0.50531000 | -0.94858200 |
| H    | 2.51025500  | -1.47623500 | 0.12855000  |

**G, 2Gw**

Cis:

|      |             |             |             |
|------|-------------|-------------|-------------|
| -2 1 |             |             |             |
| U    | -0.41501600 | -0.02753900 | -0.04097800 |
| O    | 0.35611800  | 1.21132300  | 1.50551900  |
| O    | -1.14970100 | -1.20877700 | -1.27397200 |
| O    | 1.01166400  | 0.55309100  | -1.22538400 |
| O    | -1.75009400 | 1.65886200  | -0.74427100 |
| O    | 1.01945300  | -1.67173100 | 0.83055300  |
| O    | -1.95351000 | -0.63909300 | 1.39256400  |
| H    | 1.31011600  | 1.38280500  | 1.35859100  |
| H    | -2.01757200 | 1.66590200  | -1.66865800 |
| H    | -2.54974000 | -1.29892000 | 1.01787100  |
| H    | 1.29813000  | -1.36868300 | 1.70332600  |
| O    | 2.96656500  | 1.47810800  | 0.43711200  |
| H    | 3.25801000  | 0.54742300  | 0.34063500  |
| H    | 2.29165400  | 1.47310000  | -0.27705100 |
| O    | 3.18858500  | -1.11093100 | -0.61263300 |
| H    | 2.60028700  | -0.56208000 | -1.16639200 |
| H    | 2.47793200  | -1.47279000 | -0.01426000 |

Trans:

|      |             |             |             |
|------|-------------|-------------|-------------|
| -2 1 |             |             |             |
| U    | 0.43443900  | 0.00621300  | -0.01426200 |
| O    | -0.11175500 | -0.82085700 | 1.51734600  |
| O    | 0.91674600  | 0.84290700  | -1.54115800 |
| O    | -1.24522000 | -1.09021600 | -1.17005300 |
| O    | 1.85302200  | -1.68975700 | -0.45135400 |
| O    | -1.10257700 | 1.69123100  | 0.44728500  |
| O    | 2.01402400  | 1.12678400  | 1.13533800  |
| H    | -2.09567900 | -0.88300500 | 1.45158800  |
| H    | 2.28926700  | -1.63199200 | -1.30824400 |
| H    | 2.49370000  | 1.77274200  | 0.60525100  |
| H    | -1.48414900 | 1.58485800  | 1.32669800  |
| O    | -3.03190200 | -0.98829900 | 1.21173700  |
| H    | -3.16671200 | -0.30861900 | 0.51969700  |
| H    | -1.79350400 | -1.57193300 | -0.53425200 |
| O    | -3.18306400 | 0.80734900  | -1.01256800 |
| H    | -2.57466600 | 0.09772700  | -1.32783600 |
| H    | -2.51083300 | 1.33545900  | -0.51337100 |

Transition state:

|      |             |             |             |
|------|-------------|-------------|-------------|
| -2 1 |             |             |             |
| U    | -0.40479500 | -0.02967600 | -0.03595500 |
| O    | 0.32279600  | 1.08807000  | 1.46749700  |
| O    | -1.03678300 | -1.09614400 | -1.37795900 |
| O    | 1.18958000  | 0.73634600  | -1.14221700 |
| O    | -1.72576900 | 1.64848100  | -0.71545500 |
| O    | 1.00165100  | -1.70214100 | 0.73355600  |
| O    | -1.99223000 | -0.78568100 | 1.30107200  |
| H    | 1.34850900  | 1.32157600  | 1.25023000  |
| H    | -2.20363500 | 1.52229700  | -1.54173500 |
| H    | -2.56956700 | -1.45515300 | 0.91621000  |
| H    | 1.33621800  | -1.44997800 | 1.60297700  |
| O    | 2.61507600  | 1.53360400  | 0.62063600  |
| H    | 3.07985700  | 0.68245000  | 0.65251500  |
| H    | 1.94159800  | 1.24793200  | -0.35675700 |
| O    | 3.25954900  | -1.07545800 | -0.63704500 |
| H    | 2.69968600  | -0.43504600 | -1.11812500 |
| H    | 2.53752100  | -1.48053800 | -0.09809500 |

## H, 2Hw

Cis:

|      |             |             |             |
|------|-------------|-------------|-------------|
| -2 1 |             |             |             |
| U    | 0.44008200  | 0.00992500  | -0.05404900 |
| O    | -1.04487400 | 0.26613700  | 1.53970000  |
| O    | 1.78766600  | -0.30664800 | -1.30729600 |
| O    | -0.33326300 | 1.51844200  | -0.92142900 |
| O    | -1.12337900 | -1.25649200 | -1.25996300 |
| O    | 1.86863400  | 1.28599500  | 1.14597800  |
| O    | 1.05970100  | -1.79788700 | 0.98740500  |
| H    | -1.69285400 | 0.94451700  | 1.27463700  |
| H    | -1.47382100 | -0.72507500 | -1.98404500 |
| H    | 1.81725600  | -2.23032300 | 0.57446100  |
| H    | 2.71501200  | 1.47333200  | 0.72801700  |
| O    | -3.01236200 | 1.52385900  | -0.13431600 |
| H    | -3.17970800 | 0.56153700  | -0.07165300 |
| H    | -2.13001400 | 1.57241500  | -0.56056200 |
| O    | -3.14406300 | -1.25878100 | 0.46631800  |
| H    | -2.53189600 | -0.91037700 | 1.14207100  |
| H    | -2.47602300 | -1.39609200 | -0.26159500 |

Trans:

|      |             |             |             |
|------|-------------|-------------|-------------|
| -2 1 |             |             |             |
| U    | 0.42480000  | -0.00312500 | 0.02958700  |
| O    | -0.83665700 | -0.18970400 | -1.30032400 |
| O    | 1.66690400  | 0.19717500  | 1.33317000  |
| O    | -0.71931600 | -1.38502300 | 1.36434500  |
| O    | -0.83253700 | 1.74793100  | 0.90155400  |
| O    | 1.58588500  | -1.74840100 | -0.83211200 |
| O    | 1.55621500  | 1.46092500  | -1.26990900 |
| H    | -2.35995000 | -1.38287200 | -0.81297100 |
| H    | -0.64196700 | 2.00920500  | 1.80794900  |

|   |             |             |             |
|---|-------------|-------------|-------------|
| H | 2.31706400  | 1.83783800  | -0.81441600 |
| H | 2.33841600  | -2.00286900 | -0.28745700 |
| O | -3.15312300 | -1.47354700 | -0.25707100 |
| H | -3.31164400 | -0.52390700 | -0.06694300 |
| H | -1.59759500 | -1.59212300 | 1.00857300  |
| O | -3.12434000 | 1.31006900  | -0.29050700 |
| H | -2.60670500 | 1.02717000  | -1.05979000 |
| H | -2.36350000 | 1.55968400  | 0.30987400  |

Transition state:

|      |             |             |             |
|------|-------------|-------------|-------------|
| -2 1 |             |             |             |
| U    | 0.41282500  | -0.01397700 | -0.04540200 |
| O    | -0.99357200 | 0.42963500  | 1.34711400  |
| O    | 1.68630700  | -0.43741600 | -1.29329100 |
| O    | -0.66348300 | 1.23996500  | -1.25240900 |
| O    | -0.92262700 | -1.76035800 | -0.76303500 |
| O    | 1.67383800  | 1.69839600  | 0.69018800  |
| O    | 1.40019200  | -1.37813200 | 1.38840600  |
| H    | -1.76682000 | 1.05381900  | 0.89031700  |
| H    | -0.77373400 | -2.11091100 | -1.64685400 |
| H    | 2.16705200  | -1.84203000 | 1.03294100  |
| H    | 2.49946200  | 1.84332700  | 0.21668200  |
| O    | -2.66562800 | 1.64634900  | 0.01758500  |
| H    | -3.14738200 | 0.81505500  | -0.13397200 |
| H    | -1.70284600 | 1.51589800  | -0.72355100 |
| O    | -3.26401500 | -1.15365700 | 0.32487900  |
| H    | -2.77523400 | -0.80431000 | 1.08472800  |
| H    | -2.48846100 | -1.46321800 | -0.21884800 |



## Polyrate 17 input file example (UTH in gas phase, conformer 0Ag):

Filename: uo2\_oh4\_la7.dat

\*GENERAL

TITLE  
uo2cis\_oh4\_la7  
END

DL ISPE

ATOMS

1 U  
2 O  
3 O  
4 O  
5 O  
6 O  
7 O  
8 H  
9 H  
10 H  
11 H  
END

NOSUPERMOL

\*SECOND

HESSCAL hhook

FPRINT

\*OPTIMIZATION

PRINT

OPTMIN ohook  
OPTTS ohook

\*REACT1

INITGEO hooks  
GEOM

1  
2  
3  
4  
5  
6  
7  
8  
9  
10  
11  
END  
SPECIES nonlinrp

\*PROD1

INITGEO hooks  
GEOM

1  
2  
3  
4  
5  
6  
7  
8  
9  
10  
11

END  
SPECIES nonlinrp

\*START

INITGEO hooks

GEOM

1  
2  
3  
4  
5  
6  
7  
8  
9  
10  
11  
END

SPECIES nonlints  
PROJECT

\*PATH

#SYMMETRY

INTMU 3

SSTEP 0.001

RPM pagem

SRANGE

SLP 4.185

SLM -2.35

END

#SPECSTOP

# CURVE VMEP

# PERCENTDOWN 99.

#END

PRPATH

coord 1 2

xmol

freq 27

END

\*TUNNEL

ZCT

SCT

#QRST

# harmonic

# mode 27

# states all

#END

\*RATE

FORWARDK

SIGMAF 1

TST

CVT

PRDELG

PRPART rtp

TEMP

4  
5  
6  
8  
10  
20  
30  
40  
50  
75  
77.355  
100

125  
150  
175  
194.7  
200  
225  
250  
273.15  
275  
298.15  
300  
325  
350  
373.15  
375  
400  
END

ANALYSIS  
4  
5  
6  
8  
10  
20  
30  
40  
50  
75  
77.355  
100  
125  
150  
175  
194.7  
200  
225  
250  
273.15  
275  
298.15  
300  
325  
350  
373.15  
375  
400  
END

EACT  
6. 10.  
10. 20.  
20. 50.  
50. 100.  
200. 225.  
300. 325.  
END

GTLOG

### Filename: uo2\_oh4\_la7.70

\*GRGENERAL  
GRRESTART

\*GRSTART  
CHARGE -2  
MULTIPLICITY 1

\*GRCOMMON

GRENER  
%mem=200gb  
%nproc=36  
#n m06 genecp units(au) fchk nosymm  
END

GRFIRST  
%mem=200gb  
%nproc=36  
#n m06 genecp units(au) fchk nosymm force  
END

GRSEC  
%mem=200gb  
%nproc=36  
#n m06 genecp units(au) fchk nosymm freq  
END

GRBASIS  
@/local/gaus/beneliye/uo2\_oh4\_la7/ulanl2dz\_def2svp.gbs  
END

### Filename: uo2\_oh4\_la7.51

\*ISPEGEN  
ENERXN -21.87 # Corrected Reaction energy (SCF)  
ENESAD 18.85 # Corrected Activation energy (SCF)  
MEPTYPEP one  
MEPTYPEP one  
RCINFO  
SRC -4.44 # Position of the reactant in Bohr (s from fu28)  
END  
PCINFO  
SPC 7.91 # Position of the product in Bohr  
END

### Filename: uo2\_oh4\_la7.71, Reactant: Cis UTH

%mem=200gb  
%nproc=36  
#n m06 genecp fchk nosymm

-2 1  
U -0.01591500 -0.02210600 -0.05866300  
O 0.46089200 1.54508300 1.46331700  
O -0.22159700 -1.46902200 -1.24397500  
O -0.31080300 1.46362100 -1.19613700  
O -2.28948400 0.10131100 0.36860400  
O 2.26551300 0.00552400 -0.43800000  
O 0.22636700 -1.58350800 1.49566500  
H 0.26315700 2.32680800 0.93486400  
H -2.51877100 0.82904600 -0.21878700  
H 0.19129900 -2.37540200 0.94724900  
H 2.48138200 0.74918900 0.13785600

@/local/gaus/beneliye/uo2\_oh4\_la7/ulanl2dz\_def2svp.gbs

Filename: uo2\_oh4\_la7.73, Product: Trans UTH

%mem=200gb  
%nproc=36  
#n m06 genecp fchk nosymm

```
-2 1
U      -0.00449100 -0.00004900 -0.02546600
O      -0.27095700 -0.00388900  1.78357400
O       0.26804000  0.00370000 -1.81960400
O      -2.29602600 -0.04729500 -0.28347600
O       0.07593100 -2.30774700  0.02940100
O      -0.01854000  2.30918900  0.02686200
O       2.27451800  0.04632000  0.30773500
H      -2.58453400 -0.05159900  0.63544300
H       0.12114500 -2.46878700  0.97816400
H       2.59124700  0.04968300 -0.60208700
H       0.02157500  2.47295700  0.97538500
```

@/local/gaus/beneliye/uo2\_oh4\_la7/ulanl2dz\_def2svp.gbs

Filename: uo2\_oh4\_la7.75, Transition state: Trans UTH

%mem=200gb  
%nproc=36  
#n m06 genecp fchk nosymm

```
-2 1
U       0.00882300 -0.02510400 -0.04860400
O      -0.39781400  1.20581600  1.52099800
O       0.43428200 -1.07754900 -1.50454600
O      -0.96399200  1.66646400 -0.70545100
O      -2.07861700 -0.97401400  0.05142600
O       2.05124900  1.00770600 -0.23691800
O       0.89224200 -1.66935300  1.22846800
H      -0.82285400  1.76783100  0.60510100
H      -2.61546800 -0.17485000  0.09613300
H       1.19374700 -2.30771900  0.57403900
H       1.93405100  1.75171100  0.36451400
```

@/local/gaus/beneliye/uo2\_oh4\_la7/ulanl2dz\_def2svp.gbs

**Reaction rate constants (semi-classical - $k_{SC}$ -, and Quantum Tunnelling - $k_{QT}$ -)**

| UTH    |           | GAS                |                 |                    |                 |                    |                 |                    |                 |                    |                 |
|--------|-----------|--------------------|-----------------|--------------------|-----------------|--------------------|-----------------|--------------------|-----------------|--------------------|-----------------|
|        |           | A, 0A <sub>g</sub> |                 | B, 0B <sub>g</sub> |                 | C, 0C <sub>g</sub> |                 | D, 0D <sub>g</sub> |                 | E, 0E <sub>g</sub> |                 |
| T(K)   | 1/T (1/K) | k <sub>SC</sub>    | k <sub>QT</sub> |
| 10     | 1.00E-01  |                    |                 |                    |                 |                    |                 |                    |                 |                    |                 |
| 20     | 5.00E-02  | 2E-175             | 3E-07           | 2E-165             | 4E-06           | 2E-150             | 2E-05           | 1E-178             | 1E-07           | 1E-169             | 2E-06           |
| 30     | 3.33E-02  | 4E-113             | 3E-07           | 1E-106             | 4E-06           | 2E-96              | 2E-05           | 2E-115             | 1E-07           | 3E-109             | 2E-06           |
| 40     | 2.50E-02  | 6E-82              | 4E-07           | 5E-77              | 5E-06           | 2E-69              | 2E-05           | 1E-83              | 1E-07           | 4E-79              | 2E-06           |
| 50     | 2.00E-02  | 3E-63              | 5E-07           | 3E-59              | 5E-06           | 3E-53              | 3E-05           | 1E-64              | 2E-07           | 6E-61              | 3E-06           |
| 75     | 1.33E-02  | 4E-38              | 1E-06           | 1E-35              | 1E-05           | 1E-31              | 7E-05           | 3E-39              | 4E-07           | 1E-36              | 5E-06           |
| 77.36  | 1.29E-02  | 1E-36              | 1E-06           | 3E-34              | 1E-05           | 3E-30              | 8E-05           | 1E-37              | 5E-07           | 3E-35              | 5E-06           |
| 100    | 1.00E-02  | 1E-25              | 4E-06           | 9E-24              | 3E-05           | 1E-20              | 2E-04           | 2E-26              | 1E-06           | 1E-24              | 1E-05           |
| 125    | 8.00E-03  | 5E-18              | 2E-05           | 1E-16              | 1E-04           | 4E-14              | 1E-03           | 7E-19              | 1E-05           | 3E-17              | 6E-05           |
| 150    | 6.67E-03  | 6E-13              | 2E-04           | 6E-12              | 8E-04           | 9E-10              | 9E-03           | 8E-14              | 1E-04           | 2E-12              | 4E-04           |
| 175    | 5.71E-03  | 2E-09              | 2E-03           | 2E-08              | 7E-03           | 1E-06              | 9E-02           | 3E-10              | 1E-03           | 6E-09              | 4E-03           |
| 194.7  | 5.14E-03  | 4E-07              | 1E-02           | 2E-06              | 4E-02           | 1E-04              | 5E-01           | 5E-08              | 7E-03           | 7E-07              | 2E-02           |
| 200    | 5.00E-03  | 1E-06              | 2E-02           | 5E-06              | 6E-02           | 3E-04              | 8E-01           | 2E-07              | 1E-02           | 2E-06              | 3E-02           |
| 225    | 4.44E-03  | 1E-04              | 2E-01           | 5E-04              | 5E-01           | 2E-02              | 7E+00           | 2E-05              | 1E-01           | 2E-04              | 3E-01           |
| 250    | 4.00E-03  | 7E-03              | 2E+00           | 2E-02              | 4E+00           | 5E-01              | 5E+01           | 1E-03              | 8E-01           | 9E-03              | 2E+00           |
| 273.15 | 3.66E-03  | 1E-01              | 1E+01           | 3E-01              | 2E+01           | 7E+00              | 3E+02           | 2E-02              | 4E+00           | 2E-01              | 1E+01           |
| 275    | 3.64E-03  | 2E-01              | 1E+01           | 4E-01              | 2E+01           | 9E+00              | 3E+02           | 3E-02              | 5E+00           | 2E-01              | 1E+01           |
| 298.15 | 3.35E-03  | 2E+00              | 6E+01           | 4E+00              | 1E+02           | 7E+01              | 1E+03           | 3E-01              | 2E+01           | 2E+00              | 6E+01           |
| 300    | 3.33E-03  | 2E+00              | 7E+01           | 4E+00              | 1E+02           | 9E+01              | 1E+03           | 3E-01              | 2E+01           | 2E+00              | 7E+01           |
| 325    | 3.08E-03  | 2E+01              | 3E+02           | 3E+01              | 5E+02           | 6E+02              | 6E+03           | 3E+00              | 1E+02           | 2E+01              | 3E+02           |
| 350    | 2.86E-03  | 1E+02              | 1E+03           | 2E+02              | 2E+03           | 3E+03              | 2E+04           | 2E+01              | 4E+02           | 1E+02              | 1E+03           |
| 373.15 | 2.68E-03  | 6E+02              | 4E+03           | 8E+02              | 6E+03           | 1E+04              | 7E+04           | 1E+02              | 1E+03           | 5E+02              | 4E+03           |
| 375    | 2.67E-03  | 7E+02              | 5E+03           | 9E+02              | 6E+03           | 1E+04              | 7E+04           | 1E+02              | 1E+03           | 6E+02              | 4E+03           |
| 400    | 2.50E-03  | 3E+03              | 2E+04           | 4E+03              | 2E+04           | 5E+04              | 2E+05           | 5E+02              | 4E+03           | 2E+03              | 1E+04           |

| UTH    |           | CPCM -Water        |                 |                    |                 |                    |                 |                    |                 |                    |                 |                    |                 |
|--------|-----------|--------------------|-----------------|--------------------|-----------------|--------------------|-----------------|--------------------|-----------------|--------------------|-----------------|--------------------|-----------------|
|        |           | A, 0A <sub>w</sub> |                 | B, 0B <sub>w</sub> |                 | C, 0C <sub>w</sub> |                 | D, 0D <sub>w</sub> |                 | E, 0E <sub>w</sub> |                 | F, 0F <sub>w</sub> |                 |
| T(K)   | 1/T (1/K) | k <sub>sc</sub>    | k <sub>QT</sub> |
| 10     | 1.00E-01  |                    |                 |                    |                 | 4E-253             | 5E-02           |                    |                 |                    |                 |                    |                 |
| 20     | 5.00E-02  | 4E-204             | 2E-11           | 9E-179             | 3E-06           | 6E-121             | 5E-02           | 1E-205             | 2E-11           | 1E-204             | 7E-11           | 3E-166             | 2E-07           |
| 30     | 3.33E-02  | 3E-132             | 2E-11           | 2E-115             | 3E-06           | 7E-77              | 6E-02           | 3E-133             | 2E-11           | 1E-132             | 8E-11           | 5E-107             | 2E-07           |
| 40     | 2.50E-02  | 2E-96              | 3E-11           | 1E-83              | 3E-06           | 9E-55              | 6E-02           | 4E-97              | 3E-11           | 1E-96              | 9E-11           | 2E-77              | 2E-07           |
| 50     | 2.00E-02  | 9E-75              | 4E-11           | 1E-64              | 3E-06           | 2E-41              | 6E-02           | 2E-75              | 3E-11           | 5E-75              | 1E-10           | 1E-59              | 3E-07           |
| 75     | 1.33E-02  | 6E-46              | 1E-10           | 4E-39              | 5E-06           | 9E-24              | 9E-02           | 2E-46              | 8E-11           | 4E-46              | 3E-10           | 7E-36              | 6E-07           |
| 77.36  | 1.29E-02  | 3E-44              | 1E-10           | 1E-37              | 5E-06           | 1E-22              | 1E-01           | 1E-44              | 1E-10           | 2E-44              | 3E-10           | 2E-34              | 7E-07           |
| 100    | 1.00E-02  | 1E-31              | 8E-10           | 2E-26              | 8E-06           | 6E-21              | 7E-04           | 7E-32              | 4E-10           | 1E-31              | 9E-10           | 6E-24              | 3E-06           |
| 125    | 8.00E-03  | 6E-23              | 8E-09           | 9E-19              | 3E-05           | 3E-14              | 2E-03           | 4E-23              | 5E-09           | 4E-23              | 6E-09           | 8E-17              | 2E-05           |
| 150    | 6.67E-03  | 4E-17              | 1E-07           | 1E-13              | 1E-04           | 7E-10              | 1E-02           | 2E-17              | 8E-08           | 3E-17              | 9E-08           | 5E-12              | 1E-04           |
| 175    | 5.71E-03  | 5E-13              | 2E-06           | 5E-10              | 1E-03           | 1E-06              | 8E-02           | 3E-13              | 1E-06           | 3E-13              | 1E-06           | 1E-08              | 1E-03           |
| 194.7  | 5.14E-03  | 1E-10              | 2E-05           | 7E-08              | 6E-03           | 8E-05              | 4E-01           | 1E-10              | 1E-05           | 1E-10              | 1E-05           | 1E-06              | 1E-02           |
| 200    | 5.00E-03  | 6E-10              | 4E-05           | 2E-07              | 9E-03           | 2E-04              | 6E-01           | 4E-10              | 2E-05           | 4E-10              | 2E-05           | 4E-06              | 2E-02           |
| 225    | 4.44E-03  | 1E-07              | 5E-04           | 3E-05              | 7E-02           | 2E-02              | 5E+00           | 1E-07              | 3E-04           | 1E-07              | 3E-04           | 4E-04              | 2E-01           |
| 250    | 4.00E-03  | 1E-05              | 5E-03           | 2E-03              | 5E-01           | 5E-01              | 4E+01           | 9E-06              | 4E-03           | 8E-06              | 3E-03           | 1E-02              | 1E+00           |
| 273.15 | 3.66E-03  | 3E-04              | 4E-02           | 3E-02              | 3E+00           | 7E+00              | 2E+02           | 3E-04              | 3E-02           | 2E-04              | 3E-02           | 2E-01              | 9E+00           |
| 275    | 3.64E-03  | 4E-04              | 5E-02           | 4E-02              | 3E+00           | 9E+00              | 3E+02           | 3E-04              | 4E-02           | 3E-04              | 3E-02           | 3E-01              | 1E+01           |
| 298.15 | 3.35E-03  | 6E-03              | 3E-01           | 4E-01              | 2E+01           | 8E+01              | 1E+03           | 5E-03              | 2E-01           | 5E-03              | 2E-01           | 3E+00              | 5E+01           |
| 300    | 3.33E-03  | 8E-03              | 3E-01           | 5E-01              | 2E+01           | 9E+01              | 1E+03           | 7E-03              | 3E-01           | 6E-03              | 2E-01           | 3E+00              | 6E+01           |
| 325    | 3.08E-03  | 9E-02              | 2E+00           | 5E+00              | 8E+01           | 7E+02              | 6E+03           | 8E-02              | 2E+00           | 7E-02              | 1E+00           | 3E+01              | 3E+02           |
| 350    | 2.86E-03  | 8E-01              | 1E+01           | 3E+01              | 3E+02           | 4E+03              | 2E+04           | 7E-01              | 9E+00           | 6E-01              | 7E+00           | 2E+02              | 1E+03           |
| 373.15 | 2.68E-03  | 5E+00              | 4E+01           | 1E+02              | 1E+03           | 1E+04              | 7E+04           | 4E+00              | 3E+01           | 3E+00              | 3E+01           | 7E+02              | 4E+03           |
| 375    | 2.67E-03  | 5E+00              | 4E+01           | 2E+02              | 1E+03           | 2E+04              | 8E+04           | 5E+00              | 4E+01           | 4E+00              | 3E+01           | 7E+02              | 4E+03           |
| 400    | 2.50E-03  | 3E+01              | 2E+02           | 7E+02              | 4E+03           | 6E+04              | 2E+05           | 2E+01              | 1E+02           | 2E+01              | 1E+02           | 3E+03              | 1E+04           |

| UTH...H <sub>2</sub> O |           | GAS                |                 |                    |                 |                    |                 |                    |                 |                    |                 |                    |                 |                    |                 |
|------------------------|-----------|--------------------|-----------------|--------------------|-----------------|--------------------|-----------------|--------------------|-----------------|--------------------|-----------------|--------------------|-----------------|--------------------|-----------------|
|                        |           | A, 1A <sub>g</sub> |                 | B, 1B <sub>g</sub> |                 | C, 1C <sub>g</sub> |                 | D, 1D <sub>g</sub> |                 | E, 1E <sub>g</sub> |                 | F, 1F <sub>g</sub> |                 | G, 1G <sub>g</sub> |                 |
| T(K)                   | 1/T (1/K) | k <sub>sc</sub>    | k <sub>QT</sub> |
| 4                      | 2.50E-01  |                    |                 |                    |                 |                    |                 |                    |                 |                    |                 |                    |                 |                    |                 |
| 5                      | 2.00E-01  |                    |                 |                    |                 |                    |                 |                    |                 |                    |                 |                    |                 |                    |                 |
| 6                      | 1.67E-01  |                    |                 |                    |                 | 2E-267             | 4E-31           |                    |                 |                    |                 |                    |                 |                    |                 |
| 8                      | 1.25E-01  | 4E-239             | 2E-07           | 9E-263             | 3E-32           | 7E-198             | 4E-31           | 5E-253             | 3E-07           | 4E-239             | 2E-07           | 9E-254             | 3E-21           | 1E-275             | 4E-09           |
| 10                     | 1.00E-01  | 4E-189             | 2E-07           | 5E-208             | 3E-32           | 4E-156             | 4E-31           | 3E-200             | 3E-07           | 4E-189             | 2E-07           | 8E-201             | 3E-21           | 3E-218             | 4E-09           |
| 20                     | 5.00E-02  | 6E-89              | 2E-07           | 2E-98              | 3E-32           | 2E-72              | 4E-31           | 2E-94              | 3E-07           | 6E-89              | 2E-07           | 8E-95              | 3E-21           | 2E-103             | 4E-09           |
| 30                     | 3.33E-02  | 2E-55              | 2E-07           | 9E-62              | 4E-32           | 2E-44              | 9E-29           | 3E-59              | 3E-07           | 2E-55              | 2E-07           | 2E-59              | 8E-21           | 3E-65              | 4E-09           |
| 40                     | 2.50E-02  | 1E-38              | 3E-07           | 2E-43              | 2E-30           | 2E-30              | 2E-20           | 2E-41              | 3E-07           | 9E-39              | 3E-07           | 1E-41              | 4E-19           | 5E-46              | 5E-09           |
| 50                     | 2.00E-02  | 1E-28              | 5E-07           | 2E-32              | 2E-24           | 4E-22              | 3E-15           | 6E-31              | 7E-07           | 1E-28              | 5E-07           | 6E-31              | 4E-17           | 2E-34              | 1E-08           |
| 75                     | 1.33E-02  | 3E-15              | 3E-05           | 1E-17              | 9E-15           | 7E-11              | 5E-08           | 1E-16              | 2E-05           | 3E-15              | 2E-05           | 1E-16              | 1E-11           | 6E-19              | 5E-07           |
| 77.36                  | 1.29E-02  | 2E-14              | 4E-05           | 1E-16              | 4E-14           | 4E-10              | 2E-07           | 7E-16              | 3E-05           | 2E-14              | 4E-05           | 1E-15              | 4E-11           | 5E-18              | 8E-07           |
| 100                    | 1.00E-02  | 2E-08              | 1E-03           | 3E-10              | 4E-09           | 3E-05              | 8E-04           | 1E-09              | 8E-04           | 2E-08              | 1E-03           | 2E-09              | 2E-07           | 3E-11              | 4E-05           |
| 125                    | 8.00E-03  | 2E-04              | 9E-02           | 9E-06              | 4E-05           | 7E-02              | 5E-01           | 2E-05              | 3E-02           | 2E-04              | 9E-02           | 4E-05              | 5E-04           | 2E-06              | 3E-03           |
| 150                    | 6.67E-03  | 1E-01              | 4E+00           | 8E-03              | 2E-02           | 1E+01              | 4E+01           | 2E-02              | 1E+00           | 1E-01              | 4E+00           | 3E-02              | 1E-01           | 2E-03              | 2E-01           |
| 175                    | 5.71E-03  | 8E+00              | 1E+02           | 1E+00              | 2E+00           | 5E+02              | 1E+03           | 2E+00              | 3E+01           | 8E+00              | 1E+02           | 4E+00              | 1E+01           | 4E-01              | 8E+00           |
| 194.7                  | 5.14E-03  | 1E+02              | 8E+02           | 2E+01              | 3E+01           | 5E+03              | 9E+03           | 3E+01              | 3E+02           | 1E+02              | 8E+02           | 7E+01              | 2E+02           | 8E+00              | 9E+01           |
| 200                    | 5.00E-03  | 2E+02              | 1E+03           | 4E+01              | 7E+01           | 8E+03              | 1E+04           | 6E+01              | 5E+02           | 2E+02              | 1E+03           | 1E+02              | 3E+02           | 2E+01              | 2E+02           |
| 225                    | 4.44E-03  | 3E+03              | 1E+04           | 7E+02              | 1E+03           | 7E+04              | 1E+05           | 9E+02              | 4E+03           | 3E+03              | 1E+04           | 2E+03              | 4E+03           | 3E+02              | 2E+03           |
| 250                    | 4.00E-03  | 2E+04              | 7E+04           | 7E+03              | 9E+03           | 4E+05              | 5E+05           | 7E+03              | 3E+04           | 2E+04              | 7E+04           | 2E+04              | 3E+04           | 4E+03              | 1E+04           |
| 273.15                 | 3.66E-03  | 1E+05              | 3E+05           | 4E+04              | 5E+04           | 1E+06              | 2E+06           | 4E+04              | 1E+05           | 1E+05              | 3E+05           | 1E+05              | 2E+05           | 2E+04              | 7E+04           |
| 275                    | 3.64E-03  | 1E+05              | 3E+05           | 5E+04              | 6E+04           | 1E+06              | 2E+06           | 4E+04              | 1E+05           | 1E+05              | 3E+05           | 1E+05              | 2E+05           | 3E+04              | 8E+04           |
| 298.15                 | 3.35E-03  | 5E+05              | 1E+06           | 2E+05              | 2E+05           | 4E+06              | 6E+06           | 2E+05              | 4E+05           | 5E+05              | 1E+06           | 6E+05              | 8E+05           | 1E+05              | 3E+05           |
| 300                    | 3.33E-03  | 5E+05              | 1E+06           | 2E+05              | 3E+05           | 5E+06              | 6E+06           | 2E+05              | 4E+05           | 5E+05              | 1E+06           | 6E+05              | 8E+05           | 1E+05              | 3E+05           |
| 325                    | 3.08E-03  | 2E+06              | 3E+06           | 8E+05              | 1E+06           | 1E+07              | 2E+07           | 7E+05              | 1E+06           | 2E+06              | 3E+06           | 2E+06              | 3E+06           | 6E+05              | 1E+06           |
| 350                    | 2.86E-03  | 5E+06              | 8E+06           | 3E+06              | 3E+06           | 3E+07              | 3E+07           | 2E+06              | 4E+06           | 5E+06              | 8E+06           | 7E+06              | 8E+06           | 2E+06              | 3E+06           |
| 373.15                 | 2.68E-03  | 1E+07              | 2E+07           | 6E+06              | 7E+06           | 5E+07              | 6E+07           | 4E+06              | 8E+06           | 1E+07              | 2E+07           | 2E+07              | 2E+07           | 5E+06              | 8E+06           |
| 375                    | 2.67E-03  | 1E+07              | 2E+07           | 7E+06              | 7E+06           | 6E+07              | 7E+07           | 5E+06              | 8E+06           | 1E+07              | 2E+07           | 2E+07              | 2E+07           | 5E+06              | 9E+06           |
| 400                    | 2.50E-03  | 2E+07              | 3E+07           | 2E+07              | 2E+07           | 1E+08              | 1E+08           | 1E+07              | 2E+07           | 2E+07              | 3E+07           | 4E+07              | 5E+07           | 1E+07              | 2E+07           |

| UTH...H2O |           | CPCM -Water        |                 |                    |                 |                    |                 |                    |                 |                    |                 |                    |                 |                    |                 |
|-----------|-----------|--------------------|-----------------|--------------------|-----------------|--------------------|-----------------|--------------------|-----------------|--------------------|-----------------|--------------------|-----------------|--------------------|-----------------|
|           |           | A, 1A <sub>w</sub> |                 | B, 1B <sub>w</sub> |                 | C, 1C <sub>w</sub> |                 | D, 1D <sub>w</sub> |                 | E, 1E <sub>w</sub> |                 | F, 1F <sub>w</sub> |                 | G, 1G <sub>g</sub> |                 |
| T(K)      | 1/T (1/K) | k <sub>sc</sub>    | k <sub>QT</sub> |
| 4         | 2.50E-01  |                    |                 | 1E-280             | 6E-26           | 3E-281             | 3E+04           |                    |                 |                    |                 | 9E-284             | 4E-28           |                    |                 |
| 5         | 2.00E-01  |                    |                 | 1E-222             | 6E-26           | 6E-223             | 3E+04           |                    |                 |                    |                 | 7E-225             | 4E-28           | 9E-248             | 3E-27           |
| 6         | 1.67E-01  |                    |                 | 1E-183             | 6E-26           | 5E-184             | 3E+04           |                    |                 |                    |                 | 1E-185             | 4E-28           | 1E-204             | 3E-27           |
| 8         | 1.25E-01  | 6E-248             | 4E-05           | 6E-135             | 6E-26           | 3E-135             | 3E+04           | 1-235              | 1E-02           | 6E-246             | 2E-04           | 2E-136             | 4E-28           | 9E-151             | 3E-27           |
| 10        | 1.00E-01  | 4E-196             | 4E-05           | 9E-106             | 6E-26           | 5E-106             | 3E+04           | 2E-186             | 1E-02           | 1E-194             | 2E-04           | 5E-107             | 4E-28           | 2E-118             | 3E-27           |
| 20        | 5.00E-02  | 2E-92              | 4E-05           | 3E-47              | 6E-26           | 2E-47              | 3E+04           | 1E-87              | 1E-02           | 1E-91              | 2E-04           | 7E-48              | 4E-28           | 1E-53              | 3E-27           |
| 30        | 3.33E-02  | 7E-58              | 5E-05           | 1E-27              | 3E-20           | 7E-28              | 3E+04           | 1E-54              | 1E-02           | 3E-57              | 2E-04           | 4E-28              | 1E-21           | 7E-32              | 2E-22           |
| 40        | 2.50E-02  | 2E-40              | 8E-05           | 9E-18              | 9E-13           | 4E-18              | 2E+04           | 4E-38              | 1E-02           | 4E-40              | 3E-04           | 4E-18              | 7E-14           | 5E-21              | 1E-14           |
| 50        | 2.00E-02  | 4E-30              | 2E-04           | 8E-12              | 3E-08           | 3E-12              | 2E+04           | 4E-28              | 2E-02           | 1E-29              | 6E-04           | 4E-12              | 6E-09           | 2E-14              | 1E-09           |
| 75        | 1.33E-02  | 4E-16              | 5E-03           | 9E-04              | 6E-02           | 2E-04              | 3E+04           | 7E-15              | 6E-02           | 7E-16              | 1E-02           | 5E-04              | 3E-02           | 1E-05              | 5E-03           |
| 77.36     | 1.29E-02  | 3E-15              | 6E-03           | 3E-03              | 1E-01           | 7E-04              | 3E+04           | 4E-14              | 7E-02           | 5E-15              | 1E-02           | 1E-03              | 7E-02           | 4E-05              | 1E-02           |
| 100       | 1.00E-02  | 4E-09              | 8E-02           | 1E+01              | 2E+02           | 2E+00              | 4E+04           | 3E-08              | 3E-01           | 6E-09              | 1E-01           | 6E+00              | 6E+01           | 8E-07              | 1E-03           |
| 125       | 8.00E-03  | 6E-05              | 1E+00           | 3E+03              | 2E+04           | 4E+02              | 1E+05           | 3E-04              | 3E+00           | 1E-04              | 2E+00           | 2E+03              | 8E+03           | 5E-03              | 4E-01           |
| 150       | 6.67E-03  | 4E-02              | 1E+01           | 1E+05              | 5E+05           | 1E+04              | 5E+05           | 1E-01              | 4E+01           | 6E-02              | 2E+01           | 7E+04              | 2E+05           | 2E+00              | 3E+01           |
| 175       | 5.71E-03  | 4E+00              | 2E+02           | 2E+06              | 5E+06           | 2E+05              | 2E+06           | 1E+01              | 5E+02           | 6E+00              | 3E+02           | 1E+06              | 2E+06           | 1E+02              | 9E+02           |
| 194.7     | 5.14E-03  | 6E+01              | 1E+03           | 9E+06              | 2E+07           | 8E+05              | 5E+06           | 1E+02              | 3E+03           | 9E+01              | 2E+03           | 5E+06              | 1E+07           | 1E+03              | 8E+03           |
| 200       | 5.00E-03  | 1E+02              | 2E+03           | 1E+07              | 3E+07           | 1E+06              | 7E+06           | 3E+02              | 4E+03           | 2E+02              | 3E+03           | 8E+06              | 1E+07           | 3E+03              | 1E+04           |
| 225       | 4.44E-03  | 2E+03              | 1E+04           | 6E+07              | 1E+08           | 5E+06              | 2E+07           | 3E+03              | 3E+04           | 2E+03              | 2E+04           | 4E+07              | 6E+07           | 3E+04              | 1E+05           |
| 250       | 4.00E-03  | 1E+04              | 8E+04           | 2E+08              | 4E+08           | 1E+07              | 4E+07           | 3E+04              | 1E+05           | 2E+04              | 1E+05           | 1E+08              | 2E+08           | 2E+05              | 6E+05           |
| 273.15    | 3.66E-03  | 7E+04              | 3E+05           | 6E+08              | 9E+08           | 3E+07              | 8E+07           | 1E+05              | 5E+05           | 1E+05              | 4E+05           | 3E+08              | 5E+08           | 9E+05              | 2E+06           |
| 275       | 3.64E-03  | 8E+04              | 3E+05           | 6E+08              | 1E+09           | 4E+07              | 9E+07           | 1E+05              | 5E+05           | 1E+05              | 5E+05           | 4E+08              | 5E+08           | 1E+06              | 2E+06           |
| 298.15    | 3.35E-03  | 3E+05              | 1E+06           | 1E+09              | 2E+09           | 7E+07              | 2E+08           | 5E+05              | 1E+06           | 4E+05              | 1E+06           | 8E+08              | 1E+09           | 3E+06              | 7E+06           |
| 300       | 3.33E-03  | 3E+05              | 1E+06           | 1E+09              | 2E+09           | 8E+07              | 2E+08           | 5E+05              | 2E+06           | 5E+05              | 2E+06           | 8E+08              | 1E+09           | 4E+06              | 8E+06           |
| 325       | 3.08E-03  | 1E+06              | 3E+06           | 3E+09              | 4E+09           | 1E+08              | 3E+08           | 2E+06              | 4E+06           | 2E+06              | 4E+06           | 2E+09              | 2E+09           | 1E+07              | 2E+07           |
| 350       | 2.86E-03  | 3E+06              | 7E+06           | 6E+09              | 7E+09           | 3E+08              | 4E+08           | 4E+06              | 1E+07           | 4E+06              | 1E+07           | 3E+09              | 4E+09           | 3E+07              | 5E+07           |
| 373.15    | 2.68E-03  | 7E+06              | 1E+07           | 9E+09              | 1E+10           | 4E+08              | 6E+08           | 9E+06              | 2E+07           | 1E+07              | 2E+07           | 5E+09              | 6E+09           | 6E+07              | 1E+08           |
| 375       | 2.67E-03  | 7E+06              | 2E+07           | 9E+09              | 1E+10           | 4E+08              | 6E+08           | 1E+07              | 2E+07           | 1E+07              | 2E+07           | 5E+09              | 6E+09           | 7E+07              | 1E+08           |
| 400       | 2.50E-03  | 2E+07              | 3E+07           | 2E+10              | 2E+10           | 6E+08              | 9E+08           | 2E+07              | 4E+07           | 2E+07              | 4E+07           | 9E+09              | 1E+10           | 1E+08              | 2E+08           |

| UTH... $(\text{H}_2\text{O})_2$ |           | GAS                |                 |                    |                 |                    |                 |                    |                 |                    |                 |                    |                 |                    |                 |
|---------------------------------|-----------|--------------------|-----------------|--------------------|-----------------|--------------------|-----------------|--------------------|-----------------|--------------------|-----------------|--------------------|-----------------|--------------------|-----------------|
|                                 |           | A, 2A <sub>g</sub> |                 | B, 2B <sub>g</sub> |                 | C, 2C <sub>g</sub> |                 | D, 2D <sub>g</sub> |                 | F, 2F <sub>g</sub> |                 | G, 2G <sub>g</sub> |                 | H, 2H <sub>g</sub> |                 |
| T(K)                            | 1/T (1/K) | k <sub>sc</sub>    | k <sub>QT</sub> |
| 4                               | 2.50E-01  |                    |                 |                    |                 |                    |                 |                    |                 |                    |                 |                    |                 |                    |                 |
| 5                               | 2.00E-01  | 4E-259             | 7E+02           | 1E-265             | 4E+02           | 1E-277             | 1E+02           | 2E-284             | 9E+01           | 8E-281             | 2E+02           | 1E-265             | 4E+02           |                    |                 |
| 6                               | 1.67E-01  | 4E-214             | 7E+02           | 1E-219             | 4E+02           | 2E-229             | 1E+02           | 3E-235             | 9E+01           | 3E-232             | 2E+02           | 2E-219             | 4E+02           |                    |                 |
| 8                               | 1.25E-01  | 7E-158             | 7E+02           | 6E-162             | 4E+02           | 2E-169             | 1E+02           | 1E-173             | 9E+01           | 1E-171             | 2E+02           | 6E-162             | 4E+02           | 1E-261             | 3E-05           |
| 10                              | 1.00E-01  | 4E-124             | 7E+02           | 2-127              | 4E+02           | 2E-133             | 1E+02           | 8E-137             | 9E+01           | 6E-135             | 2E+02           | 2E-127             | 4E+02           | 5E-207             | 3E-05           |
| 20                              | 5.00E-02  | 2E-56              | 8E+02           | 4E-58              | 4E+02           | 4E-61              | 1E+02           | 8E-63              | 9E+01           | 7E-62              | 2E+02           | 4E-58              | 4E+02           | 6E-98              | 3E-05           |
| 30                              | 3.33E-02  | 8E-34              | 8E+02           | 6E-35              | 4E+02           | 6E-37              | 1E+02           | 4E-38              | 9E+01           | 2E-37              | 2E+02           | 6E-35              | 4E+02           | 2E-61              | 2E-05           |
| 40                              | 2.50E-02  | 2E-22              | 8E+02           | 2E-23              | 3E+02           | 7E-25              | 1E+02           | 1E-25              | 9E+01           | 3E-25              | 2E+02           | 2E-23              | 4E+02           | 3E-43              | 2E-05           |
| 50                              | 2.00E-02  | 1E-15              | 8E+02           | 2E-16              | 3E+02           | 1E-17              | 1E+02           | 3E-18              | 9E+01           | 7E-18              | 2E+02           | 2E-16              | 4E+02           | 3E-32              | 4E-05           |
| 75                              | 1.33E-02  | 2E-06              | 1E+03           | 5E-07              | 4E+02           | 6E-08              | 1E+02           | 3E-08              | 1E+02           | 5E-08              | 3E+02           | 5E-07              | 5E+02           | 1E-17              | 8E-04           |
| 77.36                           | 1.29E-02  | 6E-06              | 1E+03           | 2E-06              | 5E+02           | 2E-07              | 1E+02           | 1E-07              | 1E+02           | 2E-07              | 3E+02           | 2E-06              | 5E+02           | 8E-17              | 1E-03           |
| 100                             | 1.00E-02  | 6E-02              | 4E+03           | 2E-02              | 1E+03           | 4E-03              | 4E+02           | 1E-01              | 3E+03           | 5E-03              | 8E+02           | 2E-02              | 1E+03           | 2E-10              | 1E-02           |
| 125                             | 8.00E-03  | 4E+01              | 2E+04           | 2E+01              | 7E+03           | 4E+00              | 3E+03           | 7E+01              | 2E+04           | 4E+00              | 5E+03           | 2E+01              | 7E+03           | 6E-06              | 2E-01           |
| 150                             | 6.67E-03  | 2E+03              | 1E+05           | 1E+03              | 5E+04           | 3E+02              | 2E+04           | 4E+03              | 1E+05           | 4E+02              | 3E+04           | 1E+03              | 5E+04           | 5E-03              | 3E+00           |
| 175                             | 5.71E-03  | 5E+04              | 8E+05           | 3E+04              | 4E+05           | 7E+03              | 1E+05           | 8E+04              | 8E+05           | 1E+04              | 2E+05           | 3E+04              | 4E+05           | 6E-01              | 4E+01           |
| 194.7                           | 5.14E-03  | 3E+05              | 3E+06           | 2E+05              | 1E+06           | 5E+04              | 5E+05           | 5E+05              | 3E+06           | 7E+04              | 7E+05           | 2E+05              | 1E+06           | 1E+01              | 3E+02           |
| 200                             | 5.00E-03  | 5E+05              | 4E+06           | 3E+05              | 2E+06           | 8E+04              | 7E+05           | 7E+05              | 4E+06           | 1E+05              | 1E+06           | 3E+05              | 2E+06           | 2E+01              | 5E+02           |
| 225                             | 4.44E-03  | 3E+06              | 1E+07           | 2E+06              | 7E+06           | 5E+05              | 3E+06           | 4E+06              | 1E+07           | 7E+05              | 4E+06           | 2E+06              | 7E+06           | 4E+02              | 4E+03           |
| 250                             | 4.00E-03  | 1E+07              | 4E+07           | 6E+06              | 2E+07           | 2E+06              | 8E+06           | 1E+07              | 4E+07           | 3E+06              | 1E+07           | 6E+06              | 2E+07           | 4E+03              | 2E+04           |
| 273.15                          | 3.66E-03  | 3E+07              | 9E+07           | 2E+07              | 5E+07           | 7E+06              | 2E+07           | 4E+07              | 1E+08           | 1E+07              | 3E+07           | 2E+07              | 5E+07           | 2E+04              | 8E+04           |
| 275                             | 3.64E-03  | 3E+07              | 1E+08           | 2E+07              | 5E+07           | 7E+06              | 2E+07           | 4E+07              | 1E+08           | 1E+07              | 3E+07           | 2E+07              | 5E+07           | 2E+04              | 9E+04           |
| 298.15                          | 3.35E-03  | 8E+07              | 2E+08           | 5E+07              | 1E+08           | 2E+07              | 5E+07           | 1E+08              | 2E+08           | 3E+07              | 7E+07           | 5E+07              | 1E+08           | 9E+04              | 3E+05           |
| 300                             | 3.33E-03  | 9E+07              | 2E+08           | 5E+07              | 1E+08           | 2E+07              | 5E+07           | 1E+08              | 2E+08           | 3E+07              | 7E+07           | 5E+07              | 1E+08           | 1E+05              | 3E+05           |
| 325                             | 3.08E-03  | 2E+08              | 4E+08           | 1E+08              | 2E+08           | 4E+07              | 1E+08           | 2E+08              | 5E+08           | 7E+07              | 1E+08           | 1E+08              | 2E+08           | 4E+05              | 1E+06           |
| 350                             | 2.86E-03  | 4E+08              | 7E+08           | 2E+08              | 4E+08           | 9E+07              | 2E+08           | 5E+08              | 8E+08           | 1E+08              | 3E+08           | 2E+08              | 4E+08           | 1E+06              | 3E+06           |
| 373.15                          | 2.68E-03  | 7E+08              | 1E+09           | 4E+08              | 7E+08           | 2E+08              | 3E+08           | 8E+08              | 1E+09           | 3E+08              | 5E+08           | 4E+08              | 7E+08           | 3E+06              | 6E+06           |
| 375                             | 2.67E-03  | 7E+08              | 1E+09           | 4E+08              | 7E+08           | 2E+08              | 3E+08           | 8E+08              | 1E+09           | 3E+08              | 5E+08           | 4E+08              | 7E+08           | 3E+06              | 6E+06           |
| 400                             | 2.50E-03  | 1E+09              | 2E+09           | 7E+08              | 1E+09           | 3E+08              | 5E+08           | 1E+09              | 2E+09           | 5E+08              | 7E+08           | 7E+08              | 1E+09           | 6E+06              | 1E+07           |



| UTH... $(\text{H}_2\text{O})_2$ |           | CPCM - Water       |                 |                    |                 |                    |                 |                    |                 |                    |                 |                    |                 |                    |                 |                    |                 |
|---------------------------------|-----------|--------------------|-----------------|--------------------|-----------------|--------------------|-----------------|--------------------|-----------------|--------------------|-----------------|--------------------|-----------------|--------------------|-----------------|--------------------|-----------------|
|                                 |           | A, 2A <sub>w</sub> |                 | B, 2B <sub>w</sub> |                 | C, 2C <sub>w</sub> |                 | D, 2D <sub>w</sub> |                 | E, 2E <sub>w</sub> |                 | F, 2F <sub>w</sub> |                 | G, 2G <sub>g</sub> |                 | H, 2H <sub>g</sub> |                 |
| T(K)                            | 1/T (1/K) | k <sub>sc</sub>    | k <sub>QT</sub> |
| 4                               | 2.50E-01  |                    |                 |                    |                 |                    |                 |                    |                 |                    |                 |                    |                 |                    |                 |                    |                 |
| 5                               | 2.00E-01  | 8E-261             | 2E+03           | 1E-262             | 5E+03           | 4E-249             | 5E+03           | 2E-264             | 6E+02           | 3E-259             | 5E+03           | 4E-249             | 1E+04           | 1E-252             | 5E+03           |                    |                 |
| 6                               | 1.67E-01  | 1E-215             | 2E+03           | 4E-217             | 5E+03           | 9E-206             | 5E+03           | 1E-218             | 6E+02           | 3E-214             | 5E+03           | 8E-206             | 1E+04           | 1E-208             | 5E+03           | 9E-260             | 8E+00           |
| 8                               | 1.25E-01  | 4E-159             | 2E+03           | 4E-160             | 5E+03           | 1E-151             | 5E+03           | 3E-161             | 6E+02           | 6E-158             | 5E+03           | 1E-151             | 1E+04           | 8E-154             | 5E+03           | 4E-192             | 8E+00           |
| 10                              | 1.00E-01  | 3E-126             | 2E+02           | 6E-126             | 4E+03           | 4E-119             | 5E+03           | 8E-127             | 6E+02           | 3E-124             | 5E+03           | 4E-119             | 1E+04           | 7E-121             | 5E+03           | 2E-151             | 8E+00           |
| 20                              | 5.00E-02  | 3E-58              | 2E+02           | 2E-57              | 4E+03           | 6E-54              | 5E+03           | 8E-58              | 6E+02           | 2E-56              | 5E+03           | 5E-54              | 9E+03           | 8E-55              | 5E+03           | 4E-70              | 9E+00           |
| 30                              | 3.33E-02  | 2E-35              | 2E+02           | 2E-34              | 4E+03           | 3E-32              | 4E+03           | 9E-35              | 6E+02           | 6E-34              | 5E+03           | 3E-32              | 9E+03           | 9E-33              | 5E+03           | 6E-43              | 9E+00           |
| 40                              | 2.50E-02  | 5E-24              | 2E+02           | 6E-23              | 4E+03           | 3E-21              | 4E+03           | 3E-23              | 6E+02           | 1E-22              | 5E+03           | 3E-21              | 9E+03           | 1E-21              | 5E+03           | 2E-29              | 9E+00           |
| 50                              | 2.00E-02  | 4E-17              | 2E+02           | 5E-16              | 4E+03           | 1E-14              | 4E+03           | 3E-16              | 5E+02           | 9E-16              | 5E+03           | 1E-14              | 8E+03           | 5E-15              | 5E+03           | 4E-21              | 9E+00           |
| 75                              | 1.33E-02  | 6E-08              | 3E+02           | 8E-07              | 5E+03           | 6E-06              | 4E+03           | 6E-07              | 8E+02           | 1E-06              | 5E+03           | 6E-06              | 9E+03           | 4E-06              | 5E+03           | 4E-10              | 3E+01           |
| 77.36                           | 1.29E-02  | 2E-07              | 3E+02           | 3E-06              | 5E+03           | 2E-05              | 5E+03           | 2E-06              | 9E+02           | 4E-06              | 5E+03           | 2E-05              | 9E+03           | 1E-05              | 5E+03           | 2E-09              | 4E+01           |
| 100                             | 1.00E-02  | 5E-02              | 1E+04           | 3E-02              | 7E+03           | 1E-01              | 9E+03           | 2E-02              | 3E+03           | 3E+00              | 5E+04           | 1E-01              | 1E+04           | 1E-01              | 9E+03           | 1E-04              | 2E+02           |
| 125                             | 8.00E-03  | 3E+01              | 5E+04           | 2E+01              | 3E+04           | 6E+01              | 4E+04           | 1E+01              | 1E+04           | 8E+02              | 2E+05           | 6E+01              | 5E+04           | 5E+01              | 4E+04           | 3E-01              | 1E+03           |
| 150                             | 6.67E-03  | 2E+03              | 2E+05           | 1E+03              | 1E+05           | 3E+03              | 2E+05           | 1E+03              | 7E+04           | 3E+04              | 9E+05           | 3E+03              | 2E+05           | 3E+03              | 2E+05           | 5E+01              | 9E+03           |
| 175                             | 5.71E-03  | 4E+04              | 1E+06           | 3E+04              | 6E+05           | 6E+04              | 9E+05           | 2E+04              | 3E+05           | 4E+05              | 4E+06           | 6E+04              | 1E+06           | 6E+04              | 1E+06           | 2E+03              | 6E+04           |
| 194.7                           | 5.14E-03  | 3E+05              | 3E+06           | 2E+05              | 2E+06           | 3E+05              | 3E+06           | 1E+05              | 1E+06           | 2E+06              | 1E+07           | 3E+05              | 3E+06           | 3E+05              | 3E+06           | 2E+04              | 2E+05           |
| 200                             | 5.00E-03  | 4E+05              | 4E+06           | 3E+05              | 2E+06           | 5E+05              | 4E+06           | 2E+05              | 1E+06           | 3E+06              | 1E+07           | 5E+05              | 4E+06           | 5E+05              | 4E+06           | 3E+04              | 3E+05           |
| 225                             | 4.44E-03  | 2E+06              | 1E+07           | 2E+06              | 8E+06           | 3E+06              | 1E+07           | 1E+06              | 5E+06           | 1E+07              | 4E+07           | 3E+06              | 1E+07           | 3E+06              | 1E+07           | 2E+05              | 1E+06           |
| 250                             | 4.00E-03  | 9E+06              | 3E+07           | 6E+06              | 2E+07           | 1E+07              | 3E+07           | 4E+06              | 1E+07           | 4E+07              | 9E+07           | 1E+07              | 3E+07           | 1E+07              | 4E+07           | 1E+06              | 5E+06           |
| 273.15                          | 3.66E-03  | 3E+07              | 8E+07           | 2E+07              | 5E+07           | 3E+07              | 7E+07           | 1E+07              | 3E+07           | 9E+07              | 2E+08           | 3E+07              | 6E+07           | 3E+07              | 8E+07           | 4E+06              | 1E+07           |
| 275                             | 3.64E-03  | 3E+07              | 8E+07           | 2E+07              | 5E+07           | 3E+07              | 7E+07           | 1E+07              | 3E+07           | 9E+07              | 2E+08           | 3E+07              | 7E+07           | 3E+07              | 8E+07           | 5E+06              | 2E+07           |
| 298.15                          | 3.35E-03  | 7E+07              | 2E+08           | 5E+07              | 1E+08           | 6E+07              | 1E+08           | 3E+07              | 7E+07           | 2E+08              | 3E+08           | 6E+07              | 1E+08           | 7E+07              | 2E+08           | 1E+07              | 4E+07           |
| 300                             | 3.33E-03  | 7E+07              | 2E+08           | 5E+07              | 1E+08           | 7E+07              | 1E+08           | 3E+07              | 7E+07           | 2E+08              | 4E+08           | 7E+07              | 1E+08           | 7E+07              | 2E+08           | 2E+07              | 4E+07           |
| 325                             | 3.08E-03  | 2E+08              | 3E+08           | 1E+08              | 2E+08           | 1E+08              | 3E+08           | 7E+07              | 1E+08           | 4E+08              | 6E+08           | 1E+08              | 2E+08           | 2E+08              | 3E+08           | 4E+07              | 9E+07           |
| 350                             | 2.86E-03  | 3E+08              | 6E+08           | 2E+08              | 4E+08           | 3E+08              | 5E+08           | 1E+08              | 2E+08           | 7E+08              | 9E+08           | 3E+08              | 4E+08           | 3E+08              | 5E+08           | 9E+07              | 2E+08           |
| 373.15                          | 2.68E-03  | 5E+08              | 9E+08           | 3E+08              | 6E+08           | 4E+08              | 7E+08           | 2E+08              | 4E+08           | 1E+09              | 1E+09           | 4E+08              | 6E+08           | 5E+08              | 8E+08           | 2E+08              | 3E+08           |
| 375                             | 2.67E-03  | 5E+08              | 9E+08           | 4E+08              | 6E+08           | 5E+08              | 7E+08           | 3E+08              | 4E+08           | 1E+09              | 1E+09           | 4E+08              | 7E+08           | 5E+08              | 8E+08           | 2E+08              | 3E+08           |
| 400                             | 2.50E-03  | 9E+08              | 1E+09           | 6E+08              | 9E+08           | 7E+08              | 1E+09           | 4E+08              | 6E+08           | 2E+09              | 2E+09           | 7E+08              | 9E+08           | 8E+08              | 1E+09           | 4E+08              | 6E+08           |

## Reaction rate constants of deuterated UTH complexes

|        |           | Gas             |                 |                 |                 |                        |                 |                 |                 |                                        |                 |
|--------|-----------|-----------------|-----------------|-----------------|-----------------|------------------------|-----------------|-----------------|-----------------|----------------------------------------|-----------------|
|        |           | UTH             |                 |                 |                 | UTH...H <sub>2</sub> O |                 |                 |                 | UTH... (H <sub>2</sub> O) <sub>2</sub> |                 |
|        |           | 0A <sub>g</sub> |                 | 0D <sub>g</sub> |                 | 1F <sub>g</sub>        |                 | 1G <sub>g</sub> |                 | 2H <sub>g</sub>                        |                 |
| T(K)   | 1/T (1/K) | k <sub>sc</sub> | k <sub>QT</sub> | k <sub>sc</sub> | k <sub>QT</sub> | k <sub>sc</sub>        | k <sub>QT</sub> | k <sub>sc</sub> | k <sub>QT</sub> | k <sub>sc</sub>                        | k <sub>QT</sub> |
| 5      | 2.00E-01  |                 |                 |                 |                 |                        |                 |                 |                 |                                        |                 |
| 6      | 1.67E-01  |                 |                 |                 |                 |                        |                 |                 |                 |                                        |                 |
| 8      | 1.25E-01  |                 |                 |                 |                 | 9E-277                 | 9E-25           |                 |                 | 6E-290                                 | 2E-08           |
| 10     | 1.00E-01  |                 |                 |                 |                 | 3E-219                 | 9E-25           | 1E-238          | 1E-12           | 9E-230                                 | 2E-08           |
| 20     | 5.00E-02  | 3E-182          | 3E-11           | 4E-185          | 1E-11           | 5E-104                 | 1E-24           | 1E-113          | 1E-12           | 3E-109                                 | 2E-08           |
| 30     | 3.33E-02  | 1E-117          | 3E-11           | 1E-119          | 2E-11           | 2E-65                  | 3E-24           | 5E-72           | 1E-12           | 4E-69                                  | 2E-08           |
| 40     | 2.50E-02  | 2E-85           | 4E-11           | 7E-87           | 2E-11           | 3E-46                  | 2E-22           | 4E-51           | 2E-12           | 6E-49                                  | 2E-08           |
| 50     | 2.00E-02  | 6E-66           | 5E-11           | 4E-67           | 2E-11           | 1E-34                  | 4E-20           | 2E-38           | 4E-12           | 7E-37                                  | 3E-08           |
| 75     | 1.33E-02  | 6E-40           | 1E-10           | 6E-41           | 7E-11           | 5E-19                  | 5E-14           | 1E-21           | 4E-10           | 1E-20                                  | 8E-07           |
| 77.36  | 1.29E-02  | 2E-38           | 2E-10           | 2E-39           | 8E-11           | 4E-18                  | 2E-13           | 1E-20           | 7E-10           | 1E-19                                  | 1E-06           |
| 100    | 1.00E-02  | 6E-27           | 8E-10           | 8E-28           | 4E-10           | 3E-11                  | 3E-09           | 3E-13           | 8E-08           | 1E-12                                  | 2E-05           |
| 125    | 8.00E-03  | 4E-19           | 1E-08           | 6E-20           | 6E-09           | 1E-06                  | 1E-05           | 4E-08           | 2E-05           | 9E-08                                  | 6E-04           |
| 150    | 6.67E-03  | 7E-14           | 2E-07           | 1E-14           | 1E-07           | 2E-03                  | 8E-03           | 9E-05           | 3E-03           | 1E-04                                  | 2E-02           |
| 175    | 5.71E-03  | 3E-10           | 5E-06           | 5E-11           | 3E-06           | 4E-01                  | 9E-01           | 2E-02           | 2E-01           | 3E-02                                  | 6E-01           |
| 194.7  | 5.14E-03  | 6E-08           | 7E-05           | 1E-08           | 3E-05           | 8E+00                  | 2E+01           | 7E-01           | 4E+00           | 7E-01                                  | 7E+00           |
| 200    | 5.00E-03  | 2E-07           | 1E-04           | 3E-08           | 7E-05           | 2E+01                  | 3E+01           | 2E+00           | 8E+00           | 2E+00                                  | 1E+01           |
| 225    | 4.44E-03  | 3E-05           | 3E-03           | 5E-06           | 1E-03           | 3E+02                  | 6E+02           | 4E+01           | 1E+02           | 3E+01                                  | 2E+02           |
| 250    | 4.00E-03  | 2E-03           | 4E-02           | 3E-04           | 2E-02           | 4E+03                  | 6E+03           | 5E+02           | 1E+03           | 4E+02                                  | 1E+03           |
| 273.15 | 3.66E-03  | 3E-02           | 4E-01           | 5E-03           | 1E-01           | 2E+04                  | 3E+04           | 4E+03           | 8E+03           | 2E+03                                  | 6E+03           |
| 275    | 3.64E-03  | 4E-02           | 5E-01           | 7E-03           | 2E-01           | 3E+04                  | 4E+04           | 4E+03           | 9E+03           | 3E+03                                  | 7E+03           |
| 298.15 | 3.35E-03  | 5E-01           | 4E+00           | 8E-02           | 1E+00           | 1E+05                  | 2E+05           | 2E+04           | 4E+04           | 1E+04                                  | 3E+04           |
| 300    | 3.33E-03  | 6E-01           | 4E+00           | 1E-01           | 1E+00           | 1E+05                  | 2E+05           | 3E+04           | 5E+04           | 1E+04                                  | 3E+04           |
| 325    | 3.08E-03  | 6E+00           | 3E+01           | 1E+00           | 8E+00           | 5E+05                  | 7E+05           | 1E+05           | 2E+05           | 6E+04                                  | 1E+05           |
| 350    | 2.86E-03  | 4E+01           | 1E+02           | 7E+00           | 4E+01           | 2E+06                  | 2E+06           | 4E+05           | 6E+05           | 2E+05                                  | 3E+05           |
| 373.15 | 2.68E-03  | 2E+02           | 6E+02           | 3E+01           | 1E+02           | 5E+06                  | 5E+06           | 1E+06           | 2E+06           | 5E+05                                  | 8E+05           |
| 375    | 2.67E-03  | 2E+02           | 7E+02           | 4E+01           | 2E+02           | 5E+06                  | 6E+06           | 1E+06           | 2E+06           | 5E+05                                  | 9E+05           |
| 400    | 2.50E-03  | 1E+03           | 2E+03           | 2E+02           | 6E+02           | 1E+07                  | 1E+07           | 3E+06           | 4E+06           | 1E+06                                  | 2E+06           |

|        |           | CPCM - Water    |                 |                 |                 |                        |                 |                 |                 |                                       |                 |
|--------|-----------|-----------------|-----------------|-----------------|-----------------|------------------------|-----------------|-----------------|-----------------|---------------------------------------|-----------------|
|        |           | UTH             |                 |                 |                 | UTH...H <sub>2</sub> O |                 |                 |                 | UTH...(H <sub>2</sub> O) <sub>2</sub> |                 |
|        |           | 0A <sub>w</sub> |                 | 0F <sub>w</sub> |                 | 1C <sub>w</sub>        |                 | 1G <sub>w</sub> |                 | 2H <sub>w</sub>                       |                 |
| T(K)   | 1/T (1/K) | k <sub>sc</sub> | k <sub>QT</sub> | k <sub>sc</sub> | k <sub>QT</sub> | k <sub>sc</sub>        | k <sub>QT</sub> | k <sub>sc</sub> | k <sub>QT</sub> | k <sub>sc</sub>                       | k <sub>QT</sub> |
| 5      | 2.00E-01  |                 |                 |                 |                 | 3E-268                 | 4E+01           | 5E-289          | 4E-32           |                                       |                 |
| 6      | 1.67E-01  |                 |                 |                 |                 | 1E-221                 | 4E+01           | 5E-239          | 4E-32           |                                       |                 |
| 8      | 1.25E-01  |                 |                 |                 |                 | 1E-163                 | 4E+01           | 1E-176          | 4E-32           | 2E-224                                | 2E-02           |
| 10     | 1.00E-01  |                 |                 |                 |                 | 1E-128                 | 4E+01           | 4.55-139        | 4E-32           | 2E-177                                | 2E-02           |
| 20     | 5.00E-02  | 2E-210          | 2E-16           | 2E-172          | 6E-12           | 9E-59                  | 3E+01           | 6E-64           | 4E-32           | 4E-83                                 | 2E-02           |
| 30     | 3.33E-02  | 2E-136          | 3E-16           | 3E-111          | 7E-12           | 2E-35                  | 3E+01           | 9E-39           | 3E-24           | 1E-51                                 | 2E-02           |
| 40     | 2.50E-02  | 2E-99           | 3E-16           | 2E-80           | 9E-12           | 9E-24                  | 3E+01           | 4E-26           | 3E-16           | 8E-36                                 | 2E-02           |
| 50     | 2.00E-02  | 3E-77           | 4E-16           | 4E-62           | 1E-11           | 1E-16                  | 3E+01           | 1E-18           | 2E-11           | 3E-26                                 | 2E-02           |
| 75     | 1.33E-02  | 1E-47           | 2E-15           | 2E-37           | 5E-11           | 2E-07                  | 4E+01           | 2E-08           | 1E-04           | 1E-13                                 | 9E-02           |
| 77.36  | 1.29E-02  | 7E-46           | 3E-15           | 5E-36           | 6E-11           | 8E-07                  | 4E+01           | 9E-08           | 3E-04           | 8E-13                                 | 1E-01           |
| 100    | 1.00E-02  | 8E-33           | 3E-14           | 3E-25           | 4E-10           | 1E-02                  | 9E+01           | 3E-03           | 3E-01           | 3E-07                                 | 8E-01           |
| 125    | 8.00E-03  | 6E-24           | 9E-13           | 7E-18           | 6E-09           | 6E+00                  | 5E+02           | 4E+00           | 6E+01           | 2E-03                                 | 8E+00           |
| 150    | 6.67E-03  | 5E-18           | 4E-11           | 6E-13           | 2E-07           | 4E+02                  | 5E+03           | 4E+02           | 3E+03           | 8E-01                                 | 1E+02           |
| 175    | 5.71E-03  | 8E-14           | 2E-09           | 2E-09           | 5E-06           | 8E+03                  | 4E+04           | 1E+04           | 5E+04           | 5E+01                                 | 1E+03           |
| 194.7  | 5.14E-03  | 3E-11           | 5E-08           | 3E-07           | 8E-05           | 5E+04                  | 1E+05           | 9E+04           | 3E+05           | 7E+02                                 | 7E+03           |
| 200    | 5.00E-03  | 1E-10           | 1E-07           | 8E-07           | 2E-04           | 7E+04                  | 2E+05           | 1E+05           | 4E+05           | 1E+03                                 | 1E+04           |
| 225    | 4.44E-03  | 3E-08           | 3E-06           | 9E-05           | 4E-03           | 4E+05                  | 9E+05           | 1E+06           | 2E+06           | 1E+04                                 | 7E+04           |
| 250    | 4.00E-03  | 3E-06           | 8E-05           | 4E-03           | 6E-02           | 2E+06                  | 3E+06           | 5E+06           | 9E+06           | 9E+04                                 | 3E+05           |
| 273.15 | 3.66E-03  | 8E-05           | 1E-03           | 6E-02           | 6E-01           | 4E+06                  | 7E+06           | 2E+07           | 3E+07           | 4E+05                                 | 1E+06           |
| 275    | 3.64E-03  | 1E-04           | 1E-03           | 8E-02           | 7E-01           | 5E+06                  | 8E+06           | 2E+07           | 3E+07           | 5E+05                                 | 1E+06           |
| 298.15 | 3.35E-03  | 2E-03           | 1E-02           | 8E-01           | 5E+00           | 1E+07                  | 2E+07           | 5E+07           | 7E+07           | 2E+06                                 | 3E+06           |
| 300    | 3.33E-03  | 2E-03           | 2E-02           | 1E+00           | 5E+00           | 1E+07                  | 2E+07           | 5E+07           | 8E+07           | 2E+06                                 | 4E+06           |
| 325    | 3.08E-03  | 3E-02           | 1E-01           | 8E+00           | 3E+01           | 3E+07                  | 3E+07           | 1E+08           | 2E+08           | 5E+06                                 | 1E+07           |
| 350    | 2.86E-03  | 3E-01           | 1E+00           | 5E+01           | 2E+02           | 5E+07                  | 6E+07           | 3E+08           | 3E+08           | 1E+07                                 | 2E+07           |
| 373.15 | 2.68E-03  | 2E+00           | 5E+00           | 2E+02           | 6E+02           | 8E+07                  | 1E+08           | 5E+08           | 6E+08           | 3E+07                                 | 4E+07           |
| 375    | 2.67E-03  | 2E+00           | 5E+00           | 3E+02           | 7E+02           | 8E+07                  | 1E+08           | 5E+08           | 6E+08           | 3E+07                                 | 5E+07           |
| 400    | 2.50E-03  | 9E+00           | 2E+01           | 1E+03           | 2E+03           | 1E+08                  | 2E+08           | 9E+08           | 1E+09           | 6E+07                                 | 9E+07           |
